# Supplementary material
Source: publisher figshare collection journal article supplement (https://acs.figshare.com/ndownloader/files/4340764)
Supplement: Supplementary file 1 [file 4340764]

  
data_c091221b 
  
_audit_creation_method            SHELXL-97 
_chemical_name_systematic 
; 
 ? 
; 
_chemical_name_common             ? 
_chemical_melting_point           ? 
_chemical_formula_moiety          'C47 H66 N4 Ni O2' 
_chemical_formula_sum 
 'C47 H66 N4 Ni O2' 
_chemical_formula_weight          777.75 
  
loop_ 
 _atom_type_symbol 
 _atom_type_description 
 _atom_type_scat_dispersion_real 
 _atom_type_scat_dispersion_imag 
 _atom_type_scat_source 
 'C'  'C'   0.0181   0.0091 
 'International Tables Vol C Tables 4.2.6.8 and 6.1.1.4' 
 'H'  'H'   0.0000   0.0000 
 'International Tables Vol C Tables 4.2.6.8 and 6.1.1.4' 
 'N'  'N'   0.0311   0.0180 
 'International Tables Vol C Tables 4.2.6.8 and 6.1.1.4' 
 'Ni'  'Ni'  -3.0029   0.5091 
 'International Tables Vol C Tables 4.2.6.8 and 6.1.1.4' 
 'O'  'O'   0.0492   0.0322 
 'International Tables Vol C Tables 4.2.6.8 and 6.1.1.4' 
  
_symmetry_cell_setting            monoclinic 
_symmetry_space_group_name_H-M    'P 1 21/n 1' 
  
loop_ 
 _symmetry_equiv_pos_as_xyz 
 'x, y, z' 
 '-x+1/2, y+1/2, -z+1/2' 
 '-x, -y, -z' 
 'x-1/2, -y-1/2, z-1/2' 
  
_cell_length_a                    13.7915(14) 
_cell_length_b                    17.3519(15) 
_cell_length_c                    37.169(4) 
_cell_angle_alpha                 90.00 
_cell_angle_beta                  95.731(3) 
_cell_angle_gamma                 90.00 
_cell_volume                      8850.4(15) 
_cell_formula_units_Z             8 
_cell_measurement_temperature     113(2) 
_cell_measurement_reflns_used     9984 
_cell_measurement_theta_min       27.5 
_cell_measurement_theta_max       72.4 
  
_exptl_crystal_description        prism 
_exptl_crystal_colour             colorless 
_exptl_crystal_size_max           0.24 
_exptl_crystal_size_mid           0.14 
_exptl_crystal_size_min           0.12 
_exptl_crystal_density_meas       ? 
_exptl_crystal_density_diffrn     1.167 
_exptl_crystal_density_method     'not measured' 
_exptl_crystal_F_000              3360 
_exptl_absorpt_coefficient_mu     0.934 
_exptl_absorpt_correction_type    numerical 
_exptl_absorpt_correction_T_min   0.8070 
_exptl_absorpt_correction_T_max   0.8962 
_exptl_absorpt_process_details    CrystalClear 
  
_exptl_special_details 
; 
 ? 
; 
  
_diffrn_ambient_temperature       113(2) 
_diffrn_radiation_wavelength      1.54187 
_diffrn_radiation_type            CuK\a 
_diffrn_radiation_source          'fine-focus sealed tube' 
_diffrn_radiation_monochromator   multilayer
_diffrn_measurement_device_type   'Rigaku Saturn' 
_diffrn_measurement_method        \w 
_diffrn_detector_area_resol_mean  14.63 
_diffrn_standards_number          0 
_diffrn_standards_interval_count  0 
_diffrn_standards_interval_time   0 
_diffrn_standards_decay_%         0 
_diffrn_reflns_number             138594 
_diffrn_reflns_av_R_equivalents   0.0763 
_diffrn_reflns_av_sigmaI/netI     0.0391 
_diffrn_reflns_limit_h_min        -11 
_diffrn_reflns_limit_h_max        16 
_diffrn_reflns_limit_k_min        -21 
_diffrn_reflns_limit_k_max        21 
_diffrn_reflns_limit_l_min        -45 
_diffrn_reflns_limit_l_max        45 
_diffrn_reflns_theta_min          2.39 
_diffrn_reflns_theta_max          72.80 
_reflns_number_total              17155 
_reflns_number_gt                 15709 
_reflns_threshold_expression      >2sigma(I) 
  
_computing_data_collection        CrystalClear 
_computing_cell_refinement        CrystalClear 
_computing_data_reduction         CrystalClear 
_computing_structure_solution     'SHELXS-97 (Sheldrick, 1990)' 
_computing_structure_refinement   'SHELXL-97 (Sheldrick, 1997)' 
_computing_molecular_graphics     ? 
_computing_publication_material   'CrystalStructure 3.8' 
  
_refine_special_details 
; 
 Refinement of F^2^ against ALL reflections.  The weighted R-factor wR and 
 goodness of fit S are based on F^2^, conventional R-factors R are based 
 on F, with F set to zero for negative F^2^. The threshold expression of 
 F^2^ > 2sigma(F^2^) is used only for calculating R-factors(gt) etc. and is 
 not relevant to the choice of reflections for refinement.  R-factors based 
 on F^2^ are statistically about twice as large as those based on F, and R- 
 factors based on ALL data will be even larger. 
; 
  
_refine_ls_structure_factor_coef  Fsqd 
_refine_ls_matrix_type            full 
_refine_ls_weighting_scheme       calc 
_refine_ls_weighting_details 
 'calc w=1/[\s^2^(Fo^2^)+(0.0643P)^2^+5.8553P] where P=(Fo^2^+2Fc^2^)/3' 
_atom_sites_solution_primary      direct 
_atom_sites_solution_secondary    difmap 
_atom_sites_solution_hydrogens    geom 
_refine_ls_hydrogen_treatment     constr
_refine_ls_extinction_method      none 
_refine_ls_extinction_coef        ? 
_refine_ls_number_reflns          17155 
_refine_ls_number_parameters      1120 
_refine_ls_number_restraints      16 
_refine_ls_R_factor_all           0.0556 
_refine_ls_R_factor_gt            0.0505 
_refine_ls_wR_factor_ref          0.1363 
_refine_ls_wR_factor_gt           0.1284 
_refine_ls_goodness_of_fit_ref    1.048 
_refine_ls_restrained_S_all       1.048 
_refine_ls_shift/su_max           0.003 
_refine_ls_shift/su_mean          0.000 
  
loop_ 
 _atom_site_label 
 _atom_site_type_symbol 
 _atom_site_fract_x 
 _atom_site_fract_y 
 _atom_site_fract_z 
 _atom_site_U_iso_or_equiv 
 _atom_site_adp_type 
 _atom_site_occupancy 
 _atom_site_symmetry_multiplicity 
 _atom_site_calc_flag 
 _atom_site_refinement_flags 
 _atom_site_disorder_assembly 
 _atom_site_disorder_group 
Ni1 Ni 0.82502(2) 0.271097(17) 0.391252(8) 0.02011(9) Uani 1 1 d . . . 
Ni2 Ni 0.31113(2) 0.208360(16) 0.383470(8) 0.01876(9) Uani 1 1 d . . . 
N1 N 0.96157(12) 0.20018(9) 0.35023(4) 0.0233(3) Uani 1 1 d . . . 
N2 N 0.97432(12) 0.15094(9) 0.40361(4) 0.0224(3) Uani 1 1 d . . . 
N3 N 0.67507(11) 0.21713(8) 0.43241(4) 0.0192(3) Uani 1 1 d . . . 
N4 N 0.69338(11) 0.13971(8) 0.38814(4) 0.0210(3) Uani 1 1 d . . . 
N5 N 0.38392(11) 0.28249(8) 0.44825(4) 0.0207(3) Uani 1 1 d . . . 
N6 N 0.42834(11) 0.34578(8) 0.40249(4) 0.0201(3) Uani 1 1 d . . . 
N7 N 0.21581(12) 0.26164(8) 0.31667(4) 0.0209(3) Uani 1 1 d . . . 
N8 N 0.18778(11) 0.34086(8) 0.35947(4) 0.0195(3) Uani 1 1 d . . . 
O1 O 0.88325(10) 0.34337(7) 0.36146(4) 0.0262(3) Uani 1 1 d . . . 
O2 O 0.75725(10) 0.35276(7) 0.41018(3) 0.0237(3) Uani 1 1 d . . . 
O3 O 0.35815(10) 0.13511(7) 0.41864(3) 0.0218(3) Uani 1 1 d . . . 
O4 O 0.26984(9) 0.12513(7) 0.35340(3) 0.0214(3) Uani 1 1 d . . . 
C1 C 0.92015(14) 0.20102(10) 0.38185(5) 0.0220(4) Uani 1 1 d . . . 
C2 C 1.04848(15) 0.12006(11) 0.38562(5) 0.0277(4) Uani 1 1 d . . . 
H2 H 1.0960 0.0839 0.3951 0.033 Uiso 1 1 calc R . . 
C3 C 1.04074(14) 0.15083(11) 0.35225(5) 0.0269(4) Uani 1 1 d . . . 
H3 H 1.0816 0.1407 0.3337 0.032 Uiso 1 1 calc R . . 
C4 C 0.92741(14) 0.24723(11) 0.32006(5) 0.0250(4) Uani 1 1 d . . . 
C5 C 0.89057(14) 0.32058(11) 0.32783(5) 0.0259(4) Uani 1 1 d . . . 
C6 C 0.86365(15) 0.36881(12) 0.29727(6) 0.0314(5) Uani 1 1 d . . . 
C7 C 0.87083(16) 0.33908(14) 0.26294(6) 0.0381(5) Uani 1 1 d . . . 
H7 H 0.8528 0.3718 0.2429 0.046 Uiso 1 1 calc R . . 
C8 C 0.90255(16) 0.26464(15) 0.25563(6) 0.0367(5) Uani 1 1 d . A . 
C9 C 0.93169(15) 0.21895(12) 0.28543(5) 0.0301(4) Uani 1 1 d . . . 
H9 H 0.9546 0.1681 0.2820 0.036 Uiso 1 1 calc R . . 
C10 C 0.82200(16) 0.44970(13) 0.30276(6) 0.0368(5) Uani 1 1 d . . . 
C11 C 0.72260(16) 0.44162(13) 0.31777(6) 0.0366(5) Uani 1 1 d . . . 
H11A H 0.6961 0.4929 0.3218 0.055 Uiso 1 1 calc R . . 
H11B H 0.7306 0.4133 0.3407 0.055 Uiso 1 1 calc R . . 
H11C H 0.6777 0.4135 0.3004 0.055 Uiso 1 1 calc R . . 
C12 C 0.89004(18) 0.49740(13) 0.32935(8) 0.0456(6) Uani 1 1 d . . . 
H12A H 0.9531 0.5037 0.3197 0.068 Uiso 1 1 calc R . . 
H12B H 0.8994 0.4708 0.3527 0.068 Uiso 1 1 calc R . . 
H12C H 0.8610 0.5482 0.3326 0.068 Uiso 1 1 calc R . . 
C13 C 0.8073(2) 0.49524(16) 0.26716(8) 0.0539(7) Uani 1 1 d . . . 
H13A H 0.8696 0.4995 0.2568 0.081 Uiso 1 1 calc R . . 
H13B H 0.7828 0.5469 0.2719 0.081 Uiso 1 1 calc R . . 
H13C H 0.7601 0.4683 0.2501 0.081 Uiso 1 1 calc R . . 
C14 C 0.90156(19) 0.23399(16) 0.21686(6) 0.0435(6) Uani 1 1 d . . . 
C15 C 0.9391(3) 0.1451(2) 0.21500(10) 0.0434(10) Uani 0.614(4) 1 d P A 1 
H15A H 0.8971 0.1116 0.2280 0.065 Uiso 0.614(4) 1 calc PR A 1 
H15B H 1.0064 0.1415 0.2262 0.065 Uiso 0.614(4) 1 calc PR A 1 
H15C H 0.9365 0.1287 0.1897 0.065 Uiso 0.614(4) 1 calc PR A 1 
C16 C 0.7943(3) 0.2272(3) 0.19814(12) 0.0501(12) Uani 0.614(4) 1 d P A 1 
H16A H 0.7953 0.2025 0.1745 0.075 Uiso 0.614(4) 1 calc PR A 1 
H16B H 0.7658 0.2788 0.1950 0.075 Uiso 0.614(4) 1 calc PR A 1 
H16C H 0.7552 0.1961 0.2133 0.075 Uiso 0.614(4) 1 calc PR A 1 
C17 C 0.9627(4) 0.2790(3) 0.19414(11) 0.0492(12) Uani 0.614(4) 1 d P A 1 
H17A H 0.9579 0.2570 0.1698 0.074 Uiso 0.614(4) 1 calc PR A 1 
H17B H 1.0306 0.2775 0.2047 0.074 Uiso 0.614(4) 1 calc PR A 1 
H17C H 0.9400 0.3326 0.1928 0.074 Uiso 0.614(4) 1 calc PR A 1 
C15' C 0.8347(6) 0.1766(5) 0.21302(18) 0.059(2) Uani 0.386(4) 1 d P A 2 
H15D H 0.8328 0.1550 0.1886 0.088 Uiso 0.386(4) 1 calc PR A 2 
H15E H 0.7704 0.1972 0.2169 0.088 Uiso 0.386(4) 1 calc PR A 2 
H15F H 0.8526 0.1361 0.2308 0.088 Uiso 0.386(4) 1 calc PR A 2 
C16' C 0.8746(6) 0.3068(4) 0.18987(16) 0.052(2) Uani 0.386(4) 1 d P A 2 
H16D H 0.8762 0.2902 0.1647 0.077 Uiso 0.386(4) 1 calc PR A 2 
H16E H 0.9223 0.3481 0.1953 0.077 Uiso 0.386(4) 1 calc PR A 2 
H16F H 0.8093 0.3257 0.1934 0.077 Uiso 0.386(4) 1 calc PR A 2 
C17' C 1.0073(5) 0.2176(4) 0.21199(16) 0.0439(17) Uani 0.386(4) 1 d P A 2 
H17D H 1.0323 0.1778 0.2292 0.066 Uiso 0.386(4) 1 calc PR A 2 
H17E H 1.0456 0.2648 0.2163 0.066 Uiso 0.386(4) 1 calc PR A 2 
H17F H 1.0125 0.1995 0.1873 0.066 Uiso 0.386(4) 1 calc PR A 2 
C18 C 0.95738(15) 0.13273(11) 0.44129(5) 0.0260(4) Uani 1 1 d . . . 
H18 H 0.9041 0.1671 0.4483 0.031 Uiso 1 1 calc R . . 
C19 C 1.04850(17) 0.14856(14) 0.46699(6) 0.0363(5) Uani 1 1 d . . . 
H19A H 1.1019 0.1158 0.4605 0.054 Uiso 1 1 calc R . . 
H19B H 1.0352 0.1372 0.4918 0.054 Uiso 1 1 calc R . . 
H19C H 1.0669 0.2029 0.4652 0.054 Uiso 1 1 calc R . . 
C20 C 0.92349(19) 0.04993(13) 0.44375(6) 0.0421(6) Uani 1 1 d . . . 
H20A H 0.8624 0.0430 0.4282 0.063 Uiso 1 1 calc R . . 
H20B H 0.9129 0.0380 0.4688 0.063 Uiso 1 1 calc R . . 
H20C H 0.9732 0.0153 0.4358 0.063 Uiso 1 1 calc R . . 
C21 C 0.73452(13) 0.20208(10) 0.40613(5) 0.0198(4) Uani 1 1 d . . . 
C22 C 0.59706(14) 0.16632(10) 0.43027(5) 0.0218(4) Uani 1 1 d . . . 
H22 H 0.5455 0.1656 0.4454 0.026 Uiso 1 1 calc R . . 
C23 C 0.60854(14) 0.11853(10) 0.40269(5) 0.0237(4) Uani 1 1 d . . . 
H23 H 0.5662 0.0775 0.3946 0.028 Uiso 1 1 calc R . . 
C24 C 0.68883(14) 0.28144(10) 0.45659(5) 0.0207(4) Uani 1 1 d . . . 
C25 C 0.73031(13) 0.34846(10) 0.44330(5) 0.0215(4) Uani 1 1 d . . . 
C26 C 0.74074(14) 0.41290(10) 0.46732(5) 0.0246(4) Uani 1 1 d . . . 
C27 C 0.70814(15) 0.40566(11) 0.50131(5) 0.0266(4) Uani 1 1 d . . . 
H27 H 0.7138 0.4493 0.5168 0.032 Uiso 1 1 calc R . . 
C28 C 0.66746(14) 0.33848(11) 0.51433(5) 0.0245(4) Uani 1 1 d . . . 
C29 C 0.65878(14) 0.27570(10) 0.49101(5) 0.0220(4) Uani 1 1 d . . . 
H29 H 0.6322 0.2287 0.4987 0.026 Uiso 1 1 calc R . . 
C30 C 0.79053(16) 0.48657(11) 0.45536(6) 0.0298(4) Uani 1 1 d . . . 
C31 C 0.89437(17) 0.46753(13) 0.44645(6) 0.0374(5) Uani 1 1 d . . . 
H31A H 0.9318 0.4460 0.4679 0.056 Uiso 1 1 calc R . . 
H31B H 0.9261 0.5146 0.4390 0.056 Uiso 1 1 calc R . . 
H31C H 0.8913 0.4298 0.4268 0.056 Uiso 1 1 calc R . . 
C32 C 0.73130(18) 0.52111(11) 0.42185(6) 0.0352(5) Uani 1 1 d . . . 
H32A H 0.7240 0.4825 0.4025 0.053 Uiso 1 1 calc R . . 
H32B H 0.7655 0.5663 0.4135 0.053 Uiso 1 1 calc R . . 
H32C H 0.6668 0.5366 0.4282 0.053 Uiso 1 1 calc R . . 
C33 C 0.79840(19) 0.54842(12) 0.48515(6) 0.0398(5) Uani 1 1 d . . . 
H33A H 0.7331 0.5616 0.4914 0.060 Uiso 1 1 calc R . . 
H33B H 0.8297 0.5946 0.4764 0.060 Uiso 1 1 calc R . . 
H33C H 0.8374 0.5285 0.5066 0.060 Uiso 1 1 calc R . . 
C34 C 0.63834(16) 0.33577(12) 0.55313(5) 0.0291(4) Uani 1 1 d . . . 
C35 C 0.5973(2) 0.25745(14) 0.56246(6) 0.0437(6) Uani 1 1 d . . . 
H35A H 0.6474 0.2178 0.5610 0.066 Uiso 1 1 calc R . . 
H35B H 0.5407 0.2453 0.5453 0.066 Uiso 1 1 calc R . . 
H35C H 0.5775 0.2589 0.5870 0.066 Uiso 1 1 calc R . . 
C36 C 0.72840(19) 0.35112(17) 0.57963(6) 0.0465(6) Uani 1 1 d . . . 
H36A H 0.7548 0.4022 0.5749 0.070 Uiso 1 1 calc R . . 
H36B H 0.7779 0.3118 0.5765 0.070 Uiso 1 1 calc R . . 
H36C H 0.7103 0.3493 0.6044 0.070 Uiso 1 1 calc R . . 
C37 C 0.5617(2) 0.39739(15) 0.55868(6) 0.0471(6) Uani 1 1 d . . . 
H37A H 0.5477 0.3973 0.5840 0.071 Uiso 1 1 calc R . . 
H37B H 0.5019 0.3862 0.5430 0.071 Uiso 1 1 calc R . . 
H37C H 0.5866 0.4481 0.5525 0.071 Uiso 1 1 calc R . . 
C38 C 0.72518(15) 0.10823(11) 0.35431(5) 0.0269(4) Uani 1 1 d . . . 
H38 H 0.7963 0.1195 0.3543 0.032 Uiso 1 1 calc R . . 
C39 C 0.71257(17) 0.02140(11) 0.35238(6) 0.0333(5) Uani 1 1 d . . . 
H39A H 0.7454 -0.0021 0.3743 0.050 Uiso 1 1 calc R . . 
H39B H 0.7411 0.0016 0.3311 0.050 Uiso 1 1 calc R . . 
H39C H 0.6430 0.0087 0.3505 0.050 Uiso 1 1 calc R . . 
C40 C 0.6722(2) 0.14880(14) 0.32183(6) 0.0473(6) Uani 1 1 d . . . 
H40A H 0.6020 0.1392 0.3213 0.071 Uiso 1 1 calc R . . 
H40B H 0.6958 0.1290 0.2996 0.071 Uiso 1 1 calc R . . 
H40C H 0.6846 0.2043 0.3237 0.071 Uiso 1 1 calc R . . 
C41 C 0.37565(14) 0.28347(10) 0.41154(5) 0.0202(4) Uani 1 1 d . . . 
C42 C 0.44064(14) 0.34444(10) 0.46187(5) 0.0231(4) Uani 1 1 d . . . 
H42 H 0.4564 0.3570 0.4866 0.028 Uiso 1 1 calc R . . 
C43 C 0.46864(14) 0.38291(10) 0.43346(5) 0.0243(4) Uani 1 1 d . . . 
H43 H 0.5088 0.4275 0.4344 0.029 Uiso 1 1 calc R . . 
C44 C 0.35244(14) 0.22014(10) 0.46932(5) 0.0207(4) Uani 1 1 d . . . 
C45 C 0.34681(13) 0.14628(10) 0.45333(5) 0.0207(4) Uani 1 1 d . . . 
C46 C 0.33023(13) 0.08323(10) 0.47654(5) 0.0209(4) Uani 1 1 d . . . 
C47 C 0.31549(14) 0.09847(10) 0.51224(5) 0.0231(4) Uani 1 1 d . . . 
H47 H 0.3046 0.0559 0.5274 0.028 Uiso 1 1 calc R . . 
C48 C 0.31555(14) 0.17252(11) 0.52742(5) 0.0237(4) Uani 1 1 d . . . 
C49 C 0.33495(14) 0.23324(10) 0.50512(5) 0.0233(4) Uani 1 1 d . . . 
H49 H 0.3364 0.2844 0.5143 0.028 Uiso 1 1 calc R . . 
C50 C 0.32903(14) 0.00012(10) 0.46210(5) 0.0220(4) Uani 1 1 d . . . 
C51 C 0.42755(15) -0.01900(11) 0.44825(5) 0.0276(4) Uani 1 1 d . . . 
H51A H 0.4792 -0.0160 0.4683 0.041 Uiso 1 1 calc R . . 
H51B H 0.4409 0.0180 0.4295 0.041 Uiso 1 1 calc R . . 
H51C H 0.4253 -0.0712 0.4381 0.041 Uiso 1 1 calc R . . 
C52 C 0.31025(17) -0.05914(11) 0.49111(5) 0.0315(4) Uani 1 1 d . . . 
H52A H 0.3086 -0.1109 0.4806 0.047 Uiso 1 1 calc R . . 
H52B H 0.2476 -0.0481 0.5004 0.047 Uiso 1 1 calc R . . 
H52C H 0.3625 -0.0563 0.5110 0.047 Uiso 1 1 calc R . . 
C53 C 0.24707(15) -0.00878(11) 0.43111(5) 0.0262(4) Uani 1 1 d . . . 
H53A H 0.2550 0.0302 0.4125 0.039 Uiso 1 1 calc R . . 
H53B H 0.1838 -0.0018 0.4406 0.039 Uiso 1 1 calc R . . 
H53C H 0.2502 -0.0603 0.4205 0.039 Uiso 1 1 calc R . . 
C54 C 0.29530(15) 0.18183(11) 0.56694(5) 0.0270(4) Uani 1 1 d . . . 
C55 C 0.19453(17) 0.14864(13) 0.57216(6) 0.0370(5) Uani 1 1 d . . . 
H55A H 0.1446 0.1764 0.5566 0.055 Uiso 1 1 calc R . . 
H55B H 0.1819 0.1544 0.5975 0.055 Uiso 1 1 calc R . . 
H55C H 0.1928 0.0939 0.5657 0.055 Uiso 1 1 calc R . . 
C56 C 0.37359(17) 0.13797(12) 0.59143(5) 0.0330(5) Uani 1 1 d . . . 
H56A H 0.3742 0.0838 0.5841 0.050 Uiso 1 1 calc R . . 
H56B H 0.3587 0.1414 0.6166 0.050 Uiso 1 1 calc R . . 
H56C H 0.4376 0.1609 0.5892 0.050 Uiso 1 1 calc R . . 
C57 C 0.29743(19) 0.26643(12) 0.57863(5) 0.0359(5) Uani 1 1 d . . . 
H57A H 0.3622 0.2880 0.5764 0.054 Uiso 1 1 calc R . . 
H57B H 0.2829 0.2701 0.6038 0.054 Uiso 1 1 calc R . . 
H57C H 0.2486 0.2954 0.5632 0.054 Uiso 1 1 calc R . . 
C58 C 0.45266(14) 0.36256(10) 0.36549(5) 0.0234(4) Uani 1 1 d . . . 
H58 H 0.3953 0.3482 0.3482 0.028 Uiso 1 1 calc R . . 
C59 C 0.4730(2) 0.44765(12) 0.36076(6) 0.0414(6) Uani 1 1 d . . . 
H59A H 0.4185 0.4780 0.3682 0.062 Uiso 1 1 calc R . . 
H59B H 0.4807 0.4582 0.3353 0.062 Uiso 1 1 calc R . . 
H59C H 0.5330 0.4618 0.3757 0.062 Uiso 1 1 calc R . . 
C60 C 0.53838(17) 0.31303(14) 0.35719(6) 0.0374(5) Uani 1 1 d . . . 
H60A H 0.5954 0.3258 0.3740 0.056 Uiso 1 1 calc R . . 
H60B H 0.5532 0.3228 0.3324 0.056 Uiso 1 1 calc R . . 
H60C H 0.5219 0.2585 0.3598 0.056 Uiso 1 1 calc R . . 
C61 C 0.23906(13) 0.27594(10) 0.35256(5) 0.0196(4) Uani 1 1 d . . . 
C62 C 0.15129(14) 0.31713(11) 0.30163(5) 0.0239(4) Uani 1 1 d . . . 
H62 H 0.1245 0.3199 0.2771 0.029 Uiso 1 1 calc R . . 
C63 C 0.13398(14) 0.36595(10) 0.32817(5) 0.0238(4) Uani 1 1 d . . . 
H63 H 0.0925 0.4097 0.3259 0.029 Uiso 1 1 calc R . . 
C64 C 0.24757(14) 0.19600(10) 0.29789(5) 0.0222(4) Uani 1 1 d . . . 
C65 C 0.27135(13) 0.12829(10) 0.31797(5) 0.0207(4) Uani 1 1 d . . . 
C66 C 0.29578(14) 0.06209(10) 0.29776(5) 0.0243(4) Uani 1 1 d . . . 
C67 C 0.29822(15) 0.06932(11) 0.26076(5) 0.0275(4) Uani 1 1 d . . . 
H67 H 0.3146 0.0249 0.2477 0.033 Uiso 1 1 calc R . . 
C68 C 0.27820(16) 0.13746(11) 0.24134(5) 0.0282(4) Uani 1 1 d . . . 
C69 C 0.25211(15) 0.20097(11) 0.26071(5) 0.0268(4) Uani 1 1 d . . . 
H69 H 0.2372 0.2483 0.2486 0.032 Uiso 1 1 calc R . . 
C70 C 0.32062(16) -0.01459(11) 0.31727(5) 0.0297(4) Uani 1 1 d . . . 
C71 C 0.40932(17) -0.00291(13) 0.34540(6) 0.0374(5) Uani 1 1 d . . . 
H71A H 0.4646 0.0160 0.3333 0.056 Uiso 1 1 calc R . . 
H71B H 0.4267 -0.0521 0.3573 0.056 Uiso 1 1 calc R . . 
H71C H 0.3931 0.0348 0.3635 0.056 Uiso 1 1 calc R . . 
C72 C 0.23250(18) -0.04357(12) 0.33563(5) 0.0350(5) Uani 1 1 d . . . 
H72A H 0.2115 -0.0034 0.3517 0.052 Uiso 1 1 calc R . . 
H72B H 0.2508 -0.0900 0.3497 0.052 Uiso 1 1 calc R . . 
H72C H 0.1790 -0.0558 0.3172 0.052 Uiso 1 1 calc R . . 
C73 C 0.3470(2) -0.07806(12) 0.29118(6) 0.0416(6) Uani 1 1 d . . . 
H73A H 0.2919 -0.0869 0.2729 0.062 Uiso 1 1 calc R . . 
H73B H 0.3621 -0.1258 0.3047 0.062 Uiso 1 1 calc R . . 
H73C H 0.4040 -0.0620 0.2793 0.062 Uiso 1 1 calc R . . 
C74 C 0.28662(18) 0.13879(12) 0.20053(5) 0.0350(5) Uani 1 1 d . . . 
C75 C 0.3890(2) 0.11324(15) 0.19305(7) 0.0478(6) Uani 1 1 d . . . 
H75A H 0.4373 0.1488 0.2049 0.072 Uiso 1 1 calc R . . 
H75B H 0.3938 0.1135 0.1669 0.072 Uiso 1 1 calc R . . 
H75C H 0.4014 0.0611 0.2025 0.072 Uiso 1 1 calc R . . 
C76 C 0.2118(2) 0.08227(14) 0.18194(6) 0.0438(6) Uani 1 1 d . . . 
H76A H 0.2243 0.0304 0.1918 0.066 Uiso 1 1 calc R . . 
H76B H 0.2176 0.0818 0.1559 0.066 Uiso 1 1 calc R . . 
H76C H 0.1460 0.0985 0.1863 0.066 Uiso 1 1 calc R . . 
C77 C 0.2685(2) 0.21940(13) 0.18456(6) 0.0451(6) Uani 1 1 d . . . 
H77A H 0.2011 0.2348 0.1870 0.068 Uiso 1 1 calc R . . 
H77B H 0.2797 0.2189 0.1589 0.068 Uiso 1 1 calc R . . 
H77C H 0.3132 0.2561 0.1976 0.068 Uiso 1 1 calc R . . 
C78 C 0.18080(14) 0.37449(10) 0.39593(5) 0.0221(4) Uani 1 1 d . . . 
H78 H 0.2483 0.3812 0.4081 0.026 Uiso 1 1 calc R . . 
C79 C 0.13164(18) 0.45320(12) 0.39314(6) 0.0359(5) Uani 1 1 d . . . 
H79A H 0.1659 0.4866 0.3773 0.054 Uiso 1 1 calc R . . 
H79B H 0.1338 0.4764 0.4173 0.054 Uiso 1 1 calc R . . 
H79C H 0.0636 0.4472 0.3831 0.054 Uiso 1 1 calc R . . 
C80 C 0.12632(18) 0.31998(12) 0.41853(6) 0.0346(5) Uani 1 1 d . . . 
H80A H 0.0587 0.3151 0.4078 0.052 Uiso 1 1 calc R . . 
H80B H 0.1272 0.3403 0.4432 0.052 Uiso 1 1 calc R . . 
H80C H 0.1577 0.2693 0.4192 0.052 Uiso 1 1 calc R . . 
C81 C 0.0491(5) 0.6959(4) 0.47426(17) 0.078(2) Uani 0.557(5) 1 d PD B 1 
H81A H 0.1047 0.7194 0.4887 0.116 Uiso 0.557(5) 1 calc PR B 1 
H81B H 0.0610 0.6406 0.4716 0.116 Uiso 0.557(5) 1 calc PR B 1 
H81C H -0.0100 0.7034 0.4865 0.116 Uiso 0.557(5) 1 calc PR B 1 
C82 C 0.0361(3) 0.7326(2) 0.43803(9) 0.0538(15) Uani 0.557(5) 1 d PGD B 1 
C83 C 0.0728(3) 0.8058(2) 0.43262(10) 0.0435(15) Uani 0.557(5) 1 d PGD B 1 
H83 H 0.1059 0.8332 0.4523 0.052 Uiso 0.557(5) 1 calc PR B 1 
C84 C 0.0609(3) 0.83905(19) 0.39843(11) 0.0624(16) Uani 0.557(5) 1 d PG B 1 
H84 H 0.0860 0.8891 0.3947 0.075 Uiso 0.557(5) 1 calc PR B 1 
C85 C 0.0124(3) 0.7990(2) 0.36965(9) 0.0621(19) Uani 0.557(5) 1 d PG B 1 
H85 H 0.0043 0.8217 0.3463 0.075 Uiso 0.557(5) 1 calc PR B 1 
C86 C -0.0243(3) 0.7258(2) 0.37505(10) 0.0621(19) Uani 0.557(5) 1 d PG B 1 
H86 H -0.0575 0.6984 0.3554 0.075 Uiso 0.557(5) 1 calc PR B 1 
C87 C -0.0125(3) 0.69255(18) 0.40924(12) 0.062(2) Uani 0.557(5) 1 d PGD B 1 
H87 H -0.0375 0.6425 0.4129 0.074 Uiso 0.557(5) 1 calc PR B 1 
C88 C -0.0226(10) 0.7643(7) 0.3609(2) 0.111(5) Uani 0.443(5) 1 d PD B 2 
H88A H -0.0840 0.7930 0.3599 0.167 Uiso 0.443(5) 1 calc PR B 2 
H88B H -0.0338 0.7147 0.3486 0.167 Uiso 0.443(5) 1 calc PR B 2 
H88C H 0.0252 0.7941 0.3489 0.167 Uiso 0.443(5) 1 calc PR B 2 
C89 C 0.0152(4) 0.7509(4) 0.39916(12) 0.073(3) Uani 0.443(5) 1 d PGD B 2 
C90 C 0.0665(4) 0.8095(3) 0.41811(18) 0.079(4) Uani 0.443(5) 1 d PGD B 2 
H90 H 0.0784 0.8567 0.4064 0.095 Uiso 0.443(5) 1 calc PR B 2 
C91 C 0.1005(4) 0.7991(3) 0.45425(17) 0.071(3) Uani 0.443(5) 1 d PG B 2 
H91 H 0.1356 0.8391 0.4672 0.085 Uiso 0.443(5) 1 calc PR B 2 
C92 C 0.0832(3) 0.7300(3) 0.47146(12) 0.056(2) Uani 0.443(5) 1 d PG B 2 
H92 H 0.1064 0.7229 0.4962 0.067 Uiso 0.443(5) 1 calc PR B 2 
C93 C 0.0318(4) 0.6714(2) 0.45251(14) 0.0454(16) Uani 0.443(5) 1 d PG B 2 
H93 H 0.0200 0.6242 0.4643 0.055 Uiso 0.443(5) 1 calc PR B 2 
C94 C -0.0022(4) 0.6818(3) 0.41636(13) 0.058(3) Uani 0.443(5) 1 d PGD B 2 
H94 H -0.0373 0.6418 0.4034 0.069 Uiso 0.443(5) 1 calc PR B 2 
C95 C 0.0416(7) 0.0074(4) 0.7078(3) 0.099(3) Uani 0.616(6) 1 d PD C 1 
H95A H 0.0459 0.0207 0.6824 0.148 Uiso 0.616(6) 1 calc PR C 1 
H95B H -0.0103 -0.0306 0.7094 0.148 Uiso 0.616(6) 1 calc PR C 1 
H95C H 0.1039 -0.0143 0.7181 0.148 Uiso 0.616(6) 1 calc PR C 1 
C96 C 0.0194(2) 0.07825(19) 0.72831(9) 0.0491(13) Uani 0.616(6) 1 d PGD C 1 
C97 C 0.0753(2) 0.1442(2) 0.72552(11) 0.0567(15) Uani 0.616(6) 1 d PGD C 1 
H97 H 0.1290 0.1436 0.7114 0.068 Uiso 0.616(6) 1 calc PR C 1 
C98 C 0.0526(3) 0.2112(2) 0.74342(12) 0.0607(18) Uani 0.616(6) 1 d PG C 1 
H98 H 0.0908 0.2563 0.7415 0.073 Uiso 0.616(6) 1 calc PR C 1 
C99 C -0.0259(3) 0.21218(18) 0.76410(10) 0.0557(14) Uani 0.616(6) 1 d PG C 1 
H99 H -0.0415 0.2579 0.7763 0.067 Uiso 0.616(6) 1 calc PR C 1 
C100 C -0.0818(2) 0.1462(2) 0.76689(10) 0.0489(15) Uani 0.616(6) 1 d PG C 1 
H100 H -0.1355 0.1468 0.7810 0.059 Uiso 0.616(6) 1 calc PR C 1 
C101 C -0.0591(3) 0.07922(18) 0.74899(11) 0.0512(15) Uani 0.616(6) 1 d PGD C 1 
H101 H -0.0973 0.0341 0.7509 0.061 Uiso 0.616(6) 1 calc PR C 1 
C102 C 0.0810(9) 0.2335(6) 0.7441(4) 0.102(5) Uani 0.384(6) 1 d PD C 2 
H10A H 0.1418 0.2290 0.7600 0.154 Uiso 0.384(6) 1 calc PR C 2 
H10B H 0.0379 0.2707 0.7543 0.154 Uiso 0.384(6) 1 calc PR C 2 
H10C H 0.0955 0.2511 0.7201 0.154 Uiso 0.384(6) 1 calc PR C 2 
C103 C 0.0320(4) 0.1567(4) 0.74071(16) 0.067(3) Uani 0.384(6) 1 d PGD C 2 
C104 C 0.0700(4) 0.0988(4) 0.72042(18) 0.062(3) Uani 0.384(6) 1 d PGD C 2 
H104 H 0.1245 0.1091 0.7075 0.075 Uiso 0.384(6) 1 calc PR C 2 
C105 C 0.0282(6) 0.0258(4) 0.7191(2) 0.086(5) Uani 0.384(6) 1 d PG C 2 
H105 H 0.0541 -0.0137 0.7052 0.103 Uiso 0.384(6) 1 calc PR C 2 
C106 C -0.0516(5) 0.0108(5) 0.7381(2) 0.091(4) Uani 0.384(6) 1 d PG C 2 
H106 H -0.0802 -0.0391 0.7372 0.110 Uiso 0.384(6) 1 calc PR C 2 
C107 C -0.0896(4) 0.0687(6) 0.7584(2) 0.089(5) Uani 0.384(6) 1 d PG C 2 
H107 H -0.1442 0.0584 0.7713 0.107 Uiso 0.384(6) 1 calc PR C 2 
C108 C -0.0478(5) 0.1417(5) 0.75968(18) 0.075(4) Uani 0.384(6) 1 d PGD C 2 
H108 H -0.0738 0.1813 0.7736 0.090 Uiso 0.384(6) 1 calc PR C 2 
  
loop_ 
 _atom_site_aniso_label 
 _atom_site_aniso_U_11 
 _atom_site_aniso_U_22 
 _atom_site_aniso_U_33 
 _atom_site_aniso_U_23 
 _atom_site_aniso_U_13 
 _atom_site_aniso_U_12 
Ni1 0.01687(18) 0.01819(16) 0.02497(16) 0.00283(11) 0.00059(13) 0.00057(11) 
Ni2 0.01839(18) 0.01683(15) 0.02025(16) 0.00009(11) -0.00211(12) -0.00013(11) 
N1 0.0166(8) 0.0256(8) 0.0271(8) 0.0040(6) -0.0002(6) 0.0013(6) 
N2 0.0176(8) 0.0238(7) 0.0256(7) 0.0044(6) 0.0006(6) 0.0036(6) 
N3 0.0175(8) 0.0172(7) 0.0221(7) -0.0004(5) -0.0019(6) 0.0007(6) 
N4 0.0193(8) 0.0202(7) 0.0236(7) -0.0012(6) 0.0020(6) -0.0034(6) 
N5 0.0194(8) 0.0191(7) 0.0225(7) 0.0008(6) -0.0027(6) -0.0005(6) 
N6 0.0181(8) 0.0174(7) 0.0240(7) 0.0013(6) -0.0020(6) -0.0007(6) 
N7 0.0225(9) 0.0192(7) 0.0205(7) -0.0002(6) -0.0004(6) 0.0023(6) 
N8 0.0193(8) 0.0183(7) 0.0202(7) -0.0006(5) -0.0014(6) 0.0017(6) 
O1 0.0248(8) 0.0227(6) 0.0310(7) 0.0073(5) 0.0024(6) -0.0002(5) 
O2 0.0264(7) 0.0192(6) 0.0254(6) 0.0019(5) 0.0020(5) 0.0009(5) 
O3 0.0248(7) 0.0195(6) 0.0205(6) -0.0001(5) -0.0001(5) 0.0019(5) 
O4 0.0219(7) 0.0208(6) 0.0211(6) -0.0005(5) 0.0001(5) -0.0007(5) 
C1 0.0200(10) 0.0209(8) 0.0246(9) 0.0021(7) -0.0009(7) -0.0021(7) 
C2 0.0204(10) 0.0280(9) 0.0344(10) 0.0053(8) 0.0019(8) 0.0073(8) 
C3 0.0172(10) 0.0312(10) 0.0325(10) 0.0003(8) 0.0040(8) 0.0032(8) 
C4 0.0169(10) 0.0320(10) 0.0259(9) 0.0082(8) 0.0015(7) -0.0014(8) 
C5 0.0168(10) 0.0307(10) 0.0299(9) 0.0085(8) 0.0018(7) -0.0010(7) 
C6 0.0192(11) 0.0384(11) 0.0368(11) 0.0176(9) 0.0034(8) 0.0016(8) 
C7 0.0272(12) 0.0533(14) 0.0339(11) 0.0199(10) 0.0027(9) 0.0033(10) 
C8 0.0241(12) 0.0576(14) 0.0286(10) 0.0108(10) 0.0036(8) 0.0010(10) 
C9 0.0215(11) 0.0381(11) 0.0307(10) 0.0051(8) 0.0017(8) -0.0013(8) 
C10 0.0247(12) 0.0390(12) 0.0467(12) 0.0204(10) 0.0033(9) 0.0031(9) 
C11 0.0266(12) 0.0385(11) 0.0443(12) 0.0124(9) 0.0015(9) 0.0036(9) 
C12 0.0312(13) 0.0297(11) 0.0746(17) 0.0184(11) -0.0016(12) -0.0032(9) 
C13 0.0466(16) 0.0554(16) 0.0613(16) 0.0352(13) 0.0134(13) 0.0160(12) 
C14 0.0368(14) 0.0658(16) 0.0279(10) 0.0101(10) 0.0025(9) 0.0021(11) 
C15 0.050(3) 0.047(2) 0.0343(19) -0.0090(16) 0.0072(17) 0.0001(18) 
C16 0.043(3) 0.069(3) 0.037(2) -0.011(2) -0.0035(18) -0.003(2) 
C17 0.060(3) 0.055(3) 0.035(2) 0.0007(18) 0.0157(19) -0.010(2) 
C15' 0.074(6) 0.064(5) 0.035(3) -0.001(3) -0.005(3) -0.034(4) 
C16' 0.077(6) 0.053(4) 0.024(3) 0.006(3) -0.001(3) 0.003(4) 
C17' 0.054(4) 0.050(4) 0.029(3) -0.005(3) 0.012(3) -0.001(3) 
C18 0.0228(10) 0.0285(9) 0.0270(9) 0.0065(7) 0.0029(8) 0.0041(8) 
C19 0.0329(13) 0.0451(12) 0.0297(10) 0.0052(9) -0.0032(9) -0.0017(10) 
C20 0.0466(15) 0.0383(12) 0.0407(12) 0.0134(10) 0.0015(10) -0.0100(10) 
C21 0.0201(10) 0.0193(8) 0.0192(8) 0.0000(6) -0.0015(7) 0.0035(7) 
C22 0.0164(9) 0.0241(9) 0.0245(8) 0.0019(7) 0.0005(7) -0.0022(7) 
C23 0.0211(10) 0.0225(9) 0.0274(9) 0.0000(7) 0.0017(7) -0.0066(7) 
C24 0.0183(10) 0.0196(8) 0.0233(8) -0.0007(7) -0.0030(7) 0.0033(7) 
C25 0.0173(9) 0.0203(8) 0.0261(9) 0.0017(7) -0.0022(7) 0.0030(7) 
C26 0.0226(10) 0.0199(9) 0.0302(9) -0.0022(7) -0.0030(8) 0.0015(7) 
C27 0.0277(11) 0.0214(9) 0.0294(9) -0.0058(7) -0.0033(8) 0.0019(7) 
C28 0.0229(10) 0.0254(9) 0.0244(9) -0.0038(7) -0.0016(7) 0.0034(7) 
C29 0.0214(10) 0.0196(8) 0.0242(9) 0.0004(7) -0.0017(7) 0.0020(7) 
C30 0.0327(12) 0.0206(9) 0.0353(10) -0.0015(8) -0.0010(9) -0.0024(8) 
C31 0.0317(12) 0.0306(11) 0.0499(13) 0.0001(9) 0.0041(10) -0.0077(9) 
C32 0.0458(14) 0.0195(9) 0.0393(11) 0.0023(8) -0.0014(10) 0.0011(9) 
C33 0.0494(15) 0.0249(10) 0.0446(12) -0.0047(9) 0.0025(10) -0.0096(9) 
C34 0.0316(12) 0.0296(10) 0.0255(9) -0.0042(8) 0.0005(8) 0.0027(8) 
C35 0.0633(18) 0.0404(12) 0.0295(10) -0.0049(9) 0.0160(11) -0.0106(12) 
C36 0.0428(15) 0.0667(17) 0.0283(11) -0.0029(11) -0.0061(10) -0.0052(12) 
C37 0.0575(17) 0.0521(14) 0.0327(11) -0.0065(10) 0.0091(11) 0.0206(12) 
C38 0.0284(11) 0.0263(9) 0.0265(9) -0.0048(7) 0.0060(8) -0.0054(8) 
C39 0.0372(13) 0.0271(10) 0.0357(10) -0.0071(8) 0.0046(9) 0.0007(9) 
C40 0.079(2) 0.0375(12) 0.0258(10) 0.0005(9) 0.0072(11) 0.0099(12) 
C41 0.0178(9) 0.0198(8) 0.0226(8) 0.0034(7) -0.0007(7) 0.0037(7) 
C42 0.0231(10) 0.0195(8) 0.0252(9) -0.0034(7) -0.0042(7) -0.0007(7) 
C43 0.0212(10) 0.0196(8) 0.0306(9) -0.0018(7) -0.0045(8) -0.0024(7) 
C44 0.0195(10) 0.0205(8) 0.0211(8) 0.0023(7) -0.0021(7) 0.0005(7) 
C45 0.0159(9) 0.0214(8) 0.0239(8) 0.0002(7) -0.0018(7) 0.0025(7) 
C46 0.0179(9) 0.0194(8) 0.0245(8) 0.0025(7) -0.0018(7) 0.0023(7) 
C47 0.0223(10) 0.0214(8) 0.0248(9) 0.0024(7) -0.0011(7) 0.0028(7) 
C48 0.0225(10) 0.0247(9) 0.0233(9) 0.0006(7) -0.0011(7) 0.0025(7) 
C49 0.0235(10) 0.0203(8) 0.0252(9) -0.0006(7) -0.0022(7) 0.0024(7) 
C50 0.0229(10) 0.0187(8) 0.0239(8) 0.0009(7) -0.0005(7) 0.0022(7) 
C51 0.0258(11) 0.0230(9) 0.0333(10) -0.0024(8) -0.0001(8) 0.0048(8) 
C52 0.0414(13) 0.0209(9) 0.0321(10) 0.0018(8) 0.0034(9) 0.0007(8) 
C53 0.0255(11) 0.0203(8) 0.0318(9) -0.0005(7) -0.0020(8) -0.0020(7) 
C54 0.0319(11) 0.0239(9) 0.0252(9) 0.0012(7) 0.0027(8) 0.0031(8) 
C55 0.0354(13) 0.0398(12) 0.0373(11) -0.0021(9) 0.0113(9) -0.0009(10) 
C56 0.0386(13) 0.0342(11) 0.0257(9) 0.0038(8) 0.0008(9) 0.0016(9) 
C57 0.0550(15) 0.0282(10) 0.0252(10) -0.0022(8) 0.0080(9) 0.0017(10) 
C58 0.0200(10) 0.0242(9) 0.0251(9) 0.0050(7) -0.0023(7) -0.0024(7) 
C59 0.0611(17) 0.0286(11) 0.0345(11) 0.0081(9) 0.0047(10) -0.0058(10) 
C60 0.0332(13) 0.0434(12) 0.0368(11) 0.0131(9) 0.0105(9) 0.0102(10) 
C61 0.0177(9) 0.0203(8) 0.0207(8) -0.0011(6) 0.0016(7) -0.0040(7) 
C62 0.0265(11) 0.0231(9) 0.0209(8) 0.0027(7) -0.0033(7) 0.0037(7) 
C63 0.0226(10) 0.0225(9) 0.0251(9) 0.0023(7) -0.0032(7) 0.0044(7) 
C64 0.0214(10) 0.0212(8) 0.0238(9) -0.0040(7) 0.0010(7) 0.0008(7) 
C65 0.0170(9) 0.0211(8) 0.0237(8) -0.0015(7) 0.0002(7) -0.0015(7) 
C66 0.0233(10) 0.0215(9) 0.0274(9) -0.0031(7) -0.0017(7) -0.0001(7) 
C67 0.0297(11) 0.0236(9) 0.0291(9) -0.0059(7) 0.0026(8) 0.0017(8) 
C68 0.0318(12) 0.0291(10) 0.0240(9) -0.0027(7) 0.0049(8) -0.0009(8) 
C69 0.0328(12) 0.0226(9) 0.0247(9) 0.0008(7) 0.0018(8) 0.0014(8) 
C70 0.0366(12) 0.0205(9) 0.0304(9) -0.0031(7) -0.0040(8) 0.0026(8) 
C71 0.0344(13) 0.0325(11) 0.0430(12) -0.0042(9) -0.0075(10) 0.0116(9) 
C72 0.0502(14) 0.0239(9) 0.0298(10) -0.0009(8) -0.0013(9) -0.0076(9) 
C73 0.0596(16) 0.0248(10) 0.0397(12) -0.0059(9) 0.0019(11) 0.0090(10) 
C74 0.0483(14) 0.0310(10) 0.0270(10) -0.0042(8) 0.0106(9) 0.0008(9) 
C75 0.0586(18) 0.0463(14) 0.0425(13) -0.0032(11) 0.0238(12) 0.0019(12) 
C76 0.0626(17) 0.0448(13) 0.0240(10) -0.0049(9) 0.0043(10) -0.0067(12) 
C77 0.0750(19) 0.0379(12) 0.0237(10) -0.0005(9) 0.0115(11) 0.0023(12) 
C78 0.0209(10) 0.0222(8) 0.0226(8) -0.0049(7) -0.0001(7) 0.0008(7) 
C79 0.0478(14) 0.0281(10) 0.0313(10) -0.0054(8) 0.0012(9) 0.0089(9) 
C80 0.0430(14) 0.0326(11) 0.0295(10) -0.0069(8) 0.0100(9) -0.0071(9) 
C81 0.048(5) 0.090(6) 0.095(6) 0.015(5) 0.008(4) 0.019(4) 
C82 0.032(3) 0.056(3) 0.074(4) 0.004(3) 0.013(2) 0.006(2) 
C83 0.025(3) 0.045(3) 0.061(4) -0.006(2) 0.001(2) -0.008(2) 
C84 0.038(3) 0.063(4) 0.089(4) -0.011(3) 0.020(3) -0.011(3) 
C85 0.047(4) 0.085(5) 0.057(4) 0.005(3) 0.019(3) 0.005(3) 
C86 0.046(4) 0.060(4) 0.082(5) -0.022(3) 0.015(4) 0.000(3) 
C87 0.041(4) 0.042(3) 0.104(6) -0.017(4) 0.017(4) 0.001(3) 
C88 0.103(11) 0.150(14) 0.083(8) 0.003(8) 0.013(7) 0.058(10) 
C89 0.042(4) 0.125(8) 0.055(4) 0.026(5) 0.017(3) 0.048(5) 
C90 0.068(7) 0.055(6) 0.124(11) 0.017(6) 0.052(7) 0.010(5) 
C91 0.037(4) 0.058(4) 0.119(8) -0.020(5) 0.020(5) -0.004(3) 
C92 0.024(4) 0.064(5) 0.080(5) -0.025(4) 0.004(3) -0.009(3) 
C93 0.034(3) 0.044(3) 0.057(4) 0.007(3) 0.000(3) -0.010(2) 
C94 0.029(5) 0.080(6) 0.063(5) -0.007(5) 0.001(4) -0.014(4) 
C95 0.070(5) 0.085(5) 0.135(7) -0.044(5) -0.022(5) 0.025(4) 
C96 0.046(3) 0.053(3) 0.044(2) -0.006(2) -0.013(2) 0.014(2) 
C97 0.042(3) 0.070(4) 0.057(3) 0.002(3) 0.000(2) 0.006(3) 
C98 0.047(3) 0.062(4) 0.069(4) 0.004(3) -0.013(3) -0.001(3) 
C99 0.049(3) 0.059(3) 0.056(3) -0.011(2) -0.012(2) 0.008(2) 
C100 0.026(3) 0.083(4) 0.036(2) 0.006(2) -0.002(2) 0.007(2) 
C101 0.044(3) 0.064(4) 0.042(3) 0.004(2) -0.014(2) 0.000(2) 
C102 0.123(13) 0.093(9) 0.082(9) -0.022(7) -0.040(8) 0.017(9) 
C103 0.074(8) 0.067(6) 0.050(5) 0.008(4) -0.034(5) -0.003(5) 
C104 0.052(6) 0.072(7) 0.061(5) 0.020(5) -0.006(4) -0.005(5) 
C105 0.054(8) 0.076(9) 0.119(12) 0.032(9) -0.036(7) -0.005(7) 
C106 0.046(6) 0.114(10) 0.105(8) 0.050(7) -0.037(5) -0.027(6) 
C107 0.048(7) 0.166(14) 0.050(6) 0.037(7) -0.018(5) -0.002(8) 
C108 0.022(6) 0.166(13) 0.036(5) 0.018(6) -0.008(4) 0.011(6) 
  
_geom_special_details 
; 
 All esds (except the esd in the dihedral angle between two l.s. planes) 
 are estimated using the full covariance matrix.  The cell esds are taken 
 into account individually in the estimation of esds in distances, angles 
 and torsion angles; correlations between esds in cell parameters are only 
 used when they are defined by crystal symmetry.  An approximate (isotropic) 
 treatment of cell esds is used for estimating esds involving l.s. planes. 
; 
  
loop_ 
 _geom_bond_atom_site_label_1 
 _geom_bond_atom_site_label_2 
 _geom_bond_distance 
 _geom_bond_site_symmetry_2 
 _geom_bond_publ_flag 
Ni1 C1 1.8476(19) . ? 
Ni1 C21 1.8536(19) . ? 
Ni1 O2 1.8728(13) . ? 
Ni1 O1 1.9030(13) . ? 
Ni2 C41 1.8420(18) . ? 
Ni2 C61 1.8587(18) . ? 
Ni2 O4 1.8794(12) . ? 
Ni2 O3 1.8908(12) . ? 
N1 C1 1.357(2) . ? 
N1 C3 1.384(2) . ? 
N1 C4 1.429(2) . ? 
N2 C1 1.359(2) . ? 
N2 C2 1.384(3) . ? 
N2 C18 1.477(2) . ? 
N3 C21 1.362(2) . ? 
N3 C22 1.387(2) . ? 
N3 C24 1.433(2) . ? 
N4 C21 1.365(2) . ? 
N4 C23 1.387(2) . ? 
N4 C38 1.477(2) . ? 
N5 C41 1.358(2) . ? 
N5 C42 1.395(2) . ? 
N5 C44 1.428(2) . ? 
N6 C41 1.363(2) . ? 
N6 C43 1.386(2) . ? 
N6 C58 1.477(2) . ? 
N7 C61 1.363(2) . ? 
N7 C62 1.390(2) . ? 
N7 C64 1.427(2) . ? 
N8 C61 1.368(2) . ? 
N8 C63 1.386(2) . ? 
N8 C78 1.487(2) . ? 
O1 C5 1.325(2) . ? 
O2 C25 1.323(2) . ? 
O3 C45 1.329(2) . ? 
O4 C65 1.320(2) . ? 
C2 C3 1.345(3) . ? 
C2 H2 0.9500 . ? 
C3 H3 0.9500 . ? 
C4 C9 1.384(3) . ? 
C4 C5 1.411(3) . ? 
C5 C6 1.430(3) . ? 
C6 C7 1.389(3) . ? 
C6 C10 1.538(3) . ? 
C7 C8 1.399(3) . ? 
C7 H7 0.9500 . ? 
C8 C9 1.389(3) . ? 
C8 C14 1.535(3) . ? 
C9 H9 0.9500 . ? 
C10 C12 1.535(3) . ? 
C10 C11 1.537(3) . ? 
C10 C13 1.537(3) . ? 
C11 H11A 0.9800 . ? 
C11 H11B 0.9800 . ? 
C11 H11C 0.9800 . ? 
C12 H12A 0.9800 . ? 
C12 H12B 0.9800 . ? 
C12 H12C 0.9800 . ? 
C13 H13A 0.9800 . ? 
C13 H13B 0.9800 . ? 
C13 H13C 0.9800 . ? 
C14 C15' 1.355(7) . ? 
C14 C17 1.475(5) . ? 
C14 C17' 1.515(7) . ? 
C14 C16 1.575(5) . ? 
C14 C15 1.631(5) . ? 
C14 C16' 1.632(7) . ? 
C15 H15A 0.9800 . ? 
C15 H15B 0.9800 . ? 
C15 H15C 0.9800 . ? 
C16 H16A 0.9800 . ? 
C16 H16B 0.9800 . ? 
C16 H16C 0.9800 . ? 
C17 H17A 0.9800 . ? 
C17 H17B 0.9800 . ? 
C17 H17C 0.9800 . ? 
C15' H15D 0.9800 . ? 
C15' H15E 0.9800 . ? 
C15' H15F 0.9800 . ? 
C16' H16D 0.9800 . ? 
C16' H16E 0.9800 . ? 
C16' H16F 0.9800 . ? 
C17' H17D 0.9800 . ? 
C17' H17E 0.9800 . ? 
C17' H17F 0.9800 . ? 
C18 C20 1.516(3) . ? 
C18 C19 1.526(3) . ? 
C18 H18 1.0000 . ? 
C19 H19A 0.9800 . ? 
C19 H19B 0.9800 . ? 
C19 H19C 0.9800 . ? 
C20 H20A 0.9800 . ? 
C20 H20B 0.9800 . ? 
C20 H20C 0.9800 . ? 
C22 C23 1.340(3) . ? 
C22 H22 0.9500 . ? 
C23 H23 0.9500 . ? 
C24 C29 1.387(3) . ? 
C24 C25 1.407(3) . ? 
C25 C26 1.429(2) . ? 
C26 C27 1.389(3) . ? 
C26 C30 1.538(3) . ? 
C27 C28 1.401(3) . ? 
C27 H27 0.9500 . ? 
C28 C29 1.390(3) . ? 
C28 C34 1.536(3) . ? 
C29 H29 0.9500 . ? 
C30 C31 1.538(3) . ? 
C30 C33 1.538(3) . ? 
C30 C32 1.541(3) . ? 
C31 H31A 0.9800 . ? 
C31 H31B 0.9800 . ? 
C31 H31C 0.9800 . ? 
C32 H32A 0.9800 . ? 
C32 H32B 0.9800 . ? 
C32 H32C 0.9800 . ? 
C33 H33A 0.9800 . ? 
C33 H33B 0.9800 . ? 
C33 H33C 0.9800 . ? 
C34 C35 1.525(3) . ? 
C34 C36 1.529(3) . ? 
C34 C37 1.531(3) . ? 
C35 H35A 0.9800 . ? 
C35 H35B 0.9800 . ? 
C35 H35C 0.9800 . ? 
C36 H36A 0.9800 . ? 
C36 H36B 0.9800 . ? 
C36 H36C 0.9800 . ? 
C37 H37A 0.9800 . ? 
C37 H37B 0.9800 . ? 
C37 H37C 0.9800 . ? 
C38 C39 1.517(3) . ? 
C38 C40 1.520(3) . ? 
C38 H38 1.0000 . ? 
C39 H39A 0.9800 . ? 
C39 H39B 0.9800 . ? 
C39 H39C 0.9800 . ? 
C40 H40A 0.9800 . ? 
C40 H40B 0.9800 . ? 
C40 H40C 0.9800 . ? 
C42 C43 1.339(3) . ? 
C42 H42 0.9500 . ? 
C43 H43 0.9500 . ? 
C44 C49 1.394(3) . ? 
C44 C45 1.412(2) . ? 
C45 C46 1.426(2) . ? 
C46 C47 1.388(3) . ? 
C46 C50 1.538(2) . ? 
C47 C48 1.403(3) . ? 
C47 H47 0.9500 . ? 
C48 C49 1.383(3) . ? 
C48 C54 1.531(3) . ? 
C49 H49 0.9500 . ? 
C50 C52 1.531(3) . ? 
C50 C51 1.537(3) . ? 
C50 C53 1.539(2) . ? 
C51 H51A 0.9800 . ? 
C51 H51B 0.9800 . ? 
C51 H51C 0.9800 . ? 
C52 H52A 0.9800 . ? 
C52 H52B 0.9800 . ? 
C52 H52C 0.9800 . ? 
C53 H53A 0.9800 . ? 
C53 H53B 0.9800 . ? 
C53 H53C 0.9800 . ? 
C54 C57 1.530(3) . ? 
C54 C55 1.535(3) . ? 
C54 C56 1.542(3) . ? 
C55 H55A 0.9800 . ? 
C55 H55B 0.9800 . ? 
C55 H55C 0.9800 . ? 
C56 H56A 0.9800 . ? 
C56 H56B 0.9800 . ? 
C56 H56C 0.9800 . ? 
C57 H57A 0.9800 . ? 
C57 H57B 0.9800 . ? 
C57 H57C 0.9800 . ? 
C58 C59 1.516(3) . ? 
C58 C60 1.518(3) . ? 
C58 H58 1.0000 . ? 
C59 H59A 0.9800 . ? 
C59 H59B 0.9800 . ? 
C59 H59C 0.9800 . ? 
C60 H60A 0.9800 . ? 
C60 H60B 0.9800 . ? 
C60 H60C 0.9800 . ? 
C62 C63 1.340(3) . ? 
C62 H62 0.9500 . ? 
C63 H63 0.9500 . ? 
C64 C69 1.392(3) . ? 
C64 C65 1.413(3) . ? 
C65 C66 1.431(2) . ? 
C66 C67 1.385(3) . ? 
C66 C70 1.537(3) . ? 
C67 C68 1.398(3) . ? 
C67 H67 0.9500 . ? 
C68 C69 1.383(3) . ? 
C68 C74 1.533(3) . ? 
C69 H69 0.9500 . ? 
C70 C73 1.535(3) . ? 
C70 C72 1.537(3) . ? 
C70 C71 1.541(3) . ? 
C71 H71A 0.9800 . ? 
C71 H71B 0.9800 . ? 
C71 H71C 0.9800 . ? 
C72 H72A 0.9800 . ? 
C72 H72B 0.9800 . ? 
C72 H72C 0.9800 . ? 
C73 H73A 0.9800 . ? 
C73 H73B 0.9800 . ? 
C73 H73C 0.9800 . ? 
C74 C77 1.530(3) . ? 
C74 C75 1.532(4) . ? 
C74 C76 1.537(3) . ? 
C75 H75A 0.9800 . ? 
C75 H75B 0.9800 . ? 
C75 H75C 0.9800 . ? 
C76 H76A 0.9800 . ? 
C76 H76B 0.9800 . ? 
C76 H76C 0.9800 . ? 
C77 H77A 0.9800 . ? 
C77 H77B 0.9800 . ? 
C77 H77C 0.9800 . ? 
C78 C80 1.513(3) . ? 
C78 C79 1.524(3) . ? 
C78 H78 1.0000 . ? 
C79 H79A 0.9800 . ? 
C79 H79B 0.9800 . ? 
C79 H79C 0.9800 . ? 
C80 H80A 0.9800 . ? 
C80 H80B 0.9800 . ? 
C80 H80C 0.9800 . ? 
C81 C82 1.484(6) . ? 
C81 H81A 0.9800 . ? 
C81 H81B 0.9800 . ? 
C81 H81C 0.9800 . ? 
C82 C83 1.3900 . ? 
C82 C87 1.3900 . ? 
C83 C84 1.3900 . ? 
C83 H83 0.9500 . ? 
C84 C85 1.3900 . ? 
C84 H84 0.9500 . ? 
C85 C86 1.3900 . ? 
C85 H85 0.9500 . ? 
C86 C87 1.3900 . ? 
C86 H86 0.9500 . ? 
C87 H87 0.9500 . ? 
C88 C89 1.483(6) . ? 
C88 H88A 0.9800 . ? 
C88 H88B 0.9800 . ? 
C88 H88C 0.9800 . ? 
C89 C90 1.3900 . ? 
C89 C94 1.3900 . ? 
C90 C91 1.3900 . ? 
C90 H90 0.9500 . ? 
C91 C92 1.3900 . ? 
C91 H91 0.9500 . ? 
C92 C93 1.3900 . ? 
C92 H92 0.9500 . ? 
C93 C94 1.3900 . ? 
C93 H93 0.9500 . ? 
C94 H94 0.9500 . ? 
C95 C96 1.494(6) . ? 
C95 H95A 0.9800 . ? 
C95 H95B 0.9800 . ? 
C95 H95C 0.9800 . ? 
C96 C97 1.3900 . ? 
C96 C101 1.3900 . ? 
C97 C98 1.3900 . ? 
C97 H97 0.9500 . ? 
C98 C99 1.3900 . ? 
C98 H98 0.9500 . ? 
C99 C100 1.3900 . ? 
C99 H99 0.9500 . ? 
C100 C101 1.3900 . ? 
C100 H100 0.9500 . ? 
C101 H101 0.9500 . ? 
C102 C103 1.493(7) . ? 
C102 H10A 0.9800 . ? 
C102 H10B 0.9800 . ? 
C102 H10C 0.9800 . ? 
C103 C104 1.3900 . ? 
C103 C108 1.3900 . ? 
C104 C105 1.3900 . ? 
C104 H104 0.9500 . ? 
C105 C106 1.3900 . ? 
C105 H105 0.9500 . ? 
C106 C107 1.3900 . ? 
C106 H106 0.9500 . ? 
C107 C108 1.3900 . ? 
C107 H107 0.9500 . ? 
C108 H108 0.9500 . ? 
  
loop_ 
 _geom_angle_atom_site_label_1 
 _geom_angle_atom_site_label_2 
 _geom_angle_atom_site_label_3 
 _geom_angle 
 _geom_angle_site_symmetry_1 
 _geom_angle_site_symmetry_3 
 _geom_angle_publ_flag 
C1 Ni1 C21 98.24(8) . . ? 
C1 Ni1 O2 163.63(7) . . ? 
C21 Ni1 O2 90.03(7) . . ? 
C1 Ni1 O1 88.55(7) . . ? 
C21 Ni1 O1 159.27(7) . . ? 
O2 Ni1 O1 88.59(6) . . ? 
C41 Ni2 C61 95.85(8) . . ? 
C41 Ni2 O4 168.82(7) . . ? 
C61 Ni2 O4 90.33(7) . . ? 
C41 Ni2 O3 88.34(7) . . ? 
C61 Ni2 O3 167.60(7) . . ? 
O4 Ni2 O3 87.55(5) . . ? 
C1 N1 C3 110.97(15) . . ? 
C1 N1 C4 122.64(16) . . ? 
C3 N1 C4 126.36(17) . . ? 
C1 N2 C2 110.41(16) . . ? 
C1 N2 C18 124.86(16) . . ? 
C2 N2 C18 124.72(15) . . ? 
C21 N3 C22 110.87(15) . . ? 
C21 N3 C24 123.19(15) . . ? 
C22 N3 C24 125.73(16) . . ? 
C21 N4 C23 110.15(15) . . ? 
C21 N4 C38 124.46(16) . . ? 
C23 N4 C38 124.59(15) . . ? 
C41 N5 C42 110.06(15) . . ? 
C41 N5 C44 124.12(15) . . ? 
C42 N5 C44 125.09(15) . . ? 
C41 N6 C43 110.07(15) . . ? 
C41 N6 C58 124.21(15) . . ? 
C43 N6 C58 124.91(15) . . ? 
C61 N7 C62 110.24(15) . . ? 
C61 N7 C64 124.75(15) . . ? 
C62 N7 C64 124.86(15) . . ? 
C61 N8 C63 110.15(14) . . ? 
C61 N8 C78 125.16(14) . . ? 
C63 N8 C78 124.30(15) . . ? 
C5 O1 Ni1 115.39(12) . . ? 
C25 O2 Ni1 120.26(11) . . ? 
C45 O3 Ni2 120.49(11) . . ? 
C65 O4 Ni2 121.82(11) . . ? 
N1 C1 N2 104.75(16) . . ? 
N1 C1 Ni1 122.63(13) . . ? 
N2 C1 Ni1 131.82(14) . . ? 
C3 C2 N2 107.29(17) . . ? 
C3 C2 H2 126.4 . . ? 
N2 C2 H2 126.4 . . ? 
C2 C3 N1 106.58(17) . . ? 
C2 C3 H3 126.7 . . ? 
N1 C3 H3 126.7 . . ? 
C9 C4 C5 124.05(18) . . ? 
C9 C4 N1 119.08(18) . . ? 
C5 C4 N1 116.87(17) . . ? 
O1 C5 C4 121.70(16) . . ? 
O1 C5 C6 122.47(18) . . ? 
C4 C5 C6 115.82(18) . . ? 
C7 C6 C5 118.4(2) . . ? 
C7 C6 C10 121.52(18) . . ? 
C5 C6 C10 119.96(19) . . ? 
C6 C7 C8 125.02(19) . . ? 
C6 C7 H7 117.5 . . ? 
C8 C7 H7 117.5 . . ? 
C9 C8 C7 116.3(2) . . ? 
C9 C8 C14 121.7(2) . . ? 
C7 C8 C14 121.9(2) . . ? 
C4 C9 C8 120.2(2) . . ? 
C4 C9 H9 119.9 . . ? 
C8 C9 H9 119.9 . . ? 
C12 C10 C11 109.0(2) . . ? 
C12 C10 C13 107.2(2) . . ? 
C11 C10 C13 108.26(18) . . ? 
C12 C10 C6 111.42(18) . . ? 
C11 C10 C6 108.88(18) . . ? 
C13 C10 C6 112.0(2) . . ? 
C10 C11 H11A 109.5 . . ? 
C10 C11 H11B 109.5 . . ? 
H11A C11 H11B 109.5 . . ? 
C10 C11 H11C 109.5 . . ? 
H11A C11 H11C 109.5 . . ? 
H11B C11 H11C 109.5 . . ? 
C10 C12 H12A 109.5 . . ? 
C10 C12 H12B 109.5 . . ? 
H12A C12 H12B 109.5 . . ? 
C10 C12 H12C 109.5 . . ? 
H12A C12 H12C 109.5 . . ? 
H12B C12 H12C 109.5 . . ? 
C10 C13 H13A 109.5 . . ? 
C10 C13 H13B 109.5 . . ? 
H13A C13 H13B 109.5 . . ? 
C10 C13 H13C 109.5 . . ? 
H13A C13 H13C 109.5 . . ? 
H13B C13 H13C 109.5 . . ? 
C15' C14 C17 138.7(4) . . ? 
C15' C14 C17' 120.2(5) . . ? 
C17 C14 C17' 54.5(3) . . ? 
C15' C14 C8 107.2(4) . . ? 
C17 C14 C8 113.7(3) . . ? 
C17' C14 C8 105.0(3) . . ? 
C15' C14 C16 45.5(4) . . ? 
C17 C14 C16 110.6(3) . . ? 
C17' C14 C16 143.7(3) . . ? 
C8 C14 C16 111.1(2) . . ? 
C15' C14 C15 61.1(5) . . ? 
C17 C14 C15 105.9(3) . . ? 
C17' C14 C15 60.2(3) . . ? 
C8 C14 C15 113.2(2) . . ? 
C16 C14 C15 101.5(3) . . ? 
C15' C14 C16' 113.2(5) . . ? 
C17 C14 C16' 49.2(3) . . ? 
C17' C14 C16' 103.6(4) . . ? 
C8 C14 C16' 106.8(3) . . ? 
C16 C14 C16' 68.9(4) . . ? 
C15 C14 C16' 139.4(3) . . ? 
C14 C15 H15A 109.5 . . ? 
C14 C15 H15B 109.5 . . ? 
C14 C15 H15C 109.5 . . ? 
C14 C16 H16A 109.5 . . ? 
C14 C16 H16B 109.5 . . ? 
C14 C16 H16C 109.5 . . ? 
C14 C17 H17A 109.5 . . ? 
C14 C17 H17B 109.5 . . ? 
C14 C17 H17C 109.5 . . ? 
C14 C15' H15D 109.5 . . ? 
C14 C15' H15E 109.5 . . ? 
H15D C15' H15E 109.5 . . ? 
C14 C15' H15F 109.5 . . ? 
H15D C15' H15F 109.5 . . ? 
H15E C15' H15F 109.5 . . ? 
C14 C16' H16D 109.5 . . ? 
C14 C16' H16E 109.5 . . ? 
H16D C16' H16E 109.5 . . ? 
C14 C16' H16F 109.5 . . ? 
H16D C16' H16F 109.5 . . ? 
H16E C16' H16F 109.5 . . ? 
C14 C17' H17D 109.5 . . ? 
C14 C17' H17E 109.5 . . ? 
H17D C17' H17E 109.5 . . ? 
C14 C17' H17F 109.5 . . ? 
H17D C17' H17F 109.5 . . ? 
H17E C17' H17F 109.5 . . ? 
N2 C18 C20 109.81(17) . . ? 
N2 C18 C19 110.91(17) . . ? 
C20 C18 C19 111.86(17) . . ? 
N2 C18 H18 108.0 . . ? 
C20 C18 H18 108.0 . . ? 
C19 C18 H18 108.0 . . ? 
C18 C19 H19A 109.5 . . ? 
C18 C19 H19B 109.5 . . ? 
H19A C19 H19B 109.5 . . ? 
C18 C19 H19C 109.5 . . ? 
H19A C19 H19C 109.5 . . ? 
H19B C19 H19C 109.5 . . ? 
C18 C20 H20A 109.5 . . ? 
C18 C20 H20B 109.5 . . ? 
H20A C20 H20B 109.5 . . ? 
C18 C20 H20C 109.5 . . ? 
H20A C20 H20C 109.5 . . ? 
H20B C20 H20C 109.5 . . ? 
N3 C21 N4 104.64(15) . . ? 
N3 C21 Ni1 124.17(13) . . ? 
N4 C21 Ni1 128.70(13) . . ? 
C23 C22 N3 106.66(17) . . ? 
C23 C22 H22 126.7 . . ? 
N3 C22 H22 126.7 . . ? 
C22 C23 N4 107.64(16) . . ? 
C22 C23 H23 126.2 . . ? 
N4 C23 H23 126.2 . . ? 
C29 C24 C25 123.52(16) . . ? 
C29 C24 N3 119.29(16) . . ? 
C25 C24 N3 117.16(16) . . ? 
O2 C25 C24 122.33(16) . . ? 
O2 C25 C26 121.14(16) . . ? 
C24 C25 C26 116.53(17) . . ? 
C27 C26 C25 118.42(17) . . ? 
C27 C26 C30 122.21(16) . . ? 
C25 C26 C30 119.34(17) . . ? 
C26 C27 C28 124.54(17) . . ? 
C26 C27 H27 117.7 . . ? 
C28 C27 H27 117.7 . . ? 
C29 C28 C27 116.69(17) . . ? 
C29 C28 C34 123.19(17) . . ? 
C27 C28 C34 120.08(16) . . ? 
C24 C29 C28 120.26(17) . . ? 
C24 C29 H29 119.9 . . ? 
C28 C29 H29 119.9 . . ? 
C26 C30 C31 109.63(16) . . ? 
C26 C30 C33 111.92(17) . . ? 
C31 C30 C33 107.74(18) . . ? 
C26 C30 C32 109.95(16) . . ? 
C31 C30 C32 109.85(18) . . ? 
C33 C30 C32 107.70(17) . . ? 
C30 C31 H31A 109.5 . . ? 
C30 C31 H31B 109.5 . . ? 
H31A C31 H31B 109.5 . . ? 
C30 C31 H31C 109.5 . . ? 
H31A C31 H31C 109.5 . . ? 
H31B C31 H31C 109.5 . . ? 
C30 C32 H32A 109.5 . . ? 
C30 C32 H32B 109.5 . . ? 
H32A C32 H32B 109.5 . . ? 
C30 C32 H32C 109.5 . . ? 
H32A C32 H32C 109.5 . . ? 
H32B C32 H32C 109.5 . . ? 
C30 C33 H33A 109.5 . . ? 
C30 C33 H33B 109.5 . . ? 
H33A C33 H33B 109.5 . . ? 
C30 C33 H33C 109.5 . . ? 
H33A C33 H33C 109.5 . . ? 
H33B C33 H33C 109.5 . . ? 
C35 C34 C36 107.74(19) . . ? 
C35 C34 C37 108.4(2) . . ? 
C36 C34 C37 108.57(19) . . ? 
C35 C34 C28 112.23(16) . . ? 
C36 C34 C28 109.12(18) . . ? 
C37 C34 C28 110.71(17) . . ? 
C34 C35 H35A 109.5 . . ? 
C34 C35 H35B 109.5 . . ? 
H35A C35 H35B 109.5 . . ? 
C34 C35 H35C 109.5 . . ? 
H35A C35 H35C 109.5 . . ? 
H35B C35 H35C 109.5 . . ? 
C34 C36 H36A 109.5 . . ? 
C34 C36 H36B 109.5 . . ? 
H36A C36 H36B 109.5 . . ? 
C34 C36 H36C 109.5 . . ? 
H36A C36 H36C 109.5 . . ? 
H36B C36 H36C 109.5 . . ? 
C34 C37 H37A 109.5 . . ? 
C34 C37 H37B 109.5 . . ? 
H37A C37 H37B 109.5 . . ? 
C34 C37 H37C 109.5 . . ? 
H37A C37 H37C 109.5 . . ? 
H37B C37 H37C 109.5 . . ? 
N4 C38 C39 111.42(16) . . ? 
N4 C38 C40 110.17(17) . . ? 
C39 C38 C40 112.24(17) . . ? 
N4 C38 H38 107.6 . . ? 
C39 C38 H38 107.6 . . ? 
C40 C38 H38 107.6 . . ? 
C38 C39 H39A 109.5 . . ? 
C38 C39 H39B 109.5 . . ? 
H39A C39 H39B 109.5 . . ? 
C38 C39 H39C 109.5 . . ? 
H39A C39 H39C 109.5 . . ? 
H39B C39 H39C 109.5 . . ? 
C38 C40 H40A 109.5 . . ? 
C38 C40 H40B 109.5 . . ? 
H40A C40 H40B 109.5 . . ? 
C38 C40 H40C 109.5 . . ? 
H40A C40 H40C 109.5 . . ? 
H40B C40 H40C 109.5 . . ? 
N5 C41 N6 105.33(15) . . ? 
N5 C41 Ni2 123.20(13) . . ? 
N6 C41 Ni2 131.35(13) . . ? 
C43 C42 N5 107.06(16) . . ? 
C43 C42 H42 126.5 . . ? 
N5 C42 H42 126.5 . . ? 
C42 C43 N6 107.47(16) . . ? 
C42 C43 H43 126.3 . . ? 
N6 C43 H43 126.3 . . ? 
C49 C44 C45 122.84(16) . . ? 
C49 C44 N5 119.40(16) . . ? 
C45 C44 N5 117.63(16) . . ? 
O3 C45 C44 122.29(16) . . ? 
O3 C45 C46 121.13(15) . . ? 
C44 C45 C46 116.57(16) . . ? 
C47 C46 C45 118.69(16) . . ? 
C47 C46 C50 120.98(16) . . ? 
C45 C46 C50 120.33(16) . . ? 
C46 C47 C48 124.37(17) . . ? 
C46 C47 H47 117.8 . . ? 
C48 C47 H47 117.8 . . ? 
C49 C48 C47 116.69(17) . . ? 
C49 C48 C54 124.01(17) . . ? 
C47 C48 C54 119.30(16) . . ? 
C48 C49 C44 120.65(17) . . ? 
C48 C49 H49 119.7 . . ? 
C44 C49 H49 119.7 . . ? 
C52 C50 C51 107.97(15) . . ? 
C52 C50 C46 112.37(15) . . ? 
C51 C50 C46 109.89(15) . . ? 
C52 C50 C53 107.25(16) . . ? 
C51 C50 C53 109.61(15) . . ? 
C46 C50 C53 109.68(14) . . ? 
C50 C51 H51A 109.5 . . ? 
C50 C51 H51B 109.5 . . ? 
H51A C51 H51B 109.5 . . ? 
C50 C51 H51C 109.5 . . ? 
H51A C51 H51C 109.5 . . ? 
H51B C51 H51C 109.5 . . ? 
C50 C52 H52A 109.5 . . ? 
C50 C52 H52B 109.5 . . ? 
H52A C52 H52B 109.5 . . ? 
C50 C52 H52C 109.5 . . ? 
H52A C52 H52C 109.5 . . ? 
H52B C52 H52C 109.5 . . ? 
C50 C53 H53A 109.5 . . ? 
C50 C53 H53B 109.5 . . ? 
H53A C53 H53B 109.5 . . ? 
C50 C53 H53C 109.5 . . ? 
H53A C53 H53C 109.5 . . ? 
H53B C53 H53C 109.5 . . ? 
C57 C54 C48 111.93(16) . . ? 
C57 C54 C55 108.42(18) . . ? 
C48 C54 C55 109.64(16) . . ? 
C57 C54 C56 108.25(17) . . ? 
C48 C54 C56 109.30(16) . . ? 
C55 C54 C56 109.25(17) . . ? 
C54 C55 H55A 109.5 . . ? 
C54 C55 H55B 109.5 . . ? 
H55A C55 H55B 109.5 . . ? 
C54 C55 H55C 109.5 . . ? 
H55A C55 H55C 109.5 . . ? 
H55B C55 H55C 109.5 . . ? 
C54 C56 H56A 109.5 . . ? 
C54 C56 H56B 109.5 . . ? 
H56A C56 H56B 109.5 . . ? 
C54 C56 H56C 109.5 . . ? 
H56A C56 H56C 109.5 . . ? 
H56B C56 H56C 109.5 . . ? 
C54 C57 H57A 109.5 . . ? 
C54 C57 H57B 109.5 . . ? 
H57A C57 H57B 109.5 . . ? 
C54 C57 H57C 109.5 . . ? 
H57A C57 H57C 109.5 . . ? 
H57B C57 H57C 109.5 . . ? 
N6 C58 C59 111.22(16) . . ? 
N6 C58 C60 109.36(15) . . ? 
C59 C58 C60 111.75(19) . . ? 
N6 C58 H58 108.1 . . ? 
C59 C58 H58 108.1 . . ? 
C60 C58 H58 108.1 . . ? 
C58 C59 H59A 109.5 . . ? 
C58 C59 H59B 109.5 . . ? 
H59A C59 H59B 109.5 . . ? 
C58 C59 H59C 109.5 . . ? 
H59A C59 H59C 109.5 . . ? 
H59B C59 H59C 109.5 . . ? 
C58 C60 H60A 109.5 . . ? 
C58 C60 H60B 109.5 . . ? 
H60A C60 H60B 109.5 . . ? 
C58 C60 H60C 109.5 . . ? 
H60A C60 H60C 109.5 . . ? 
H60B C60 H60C 109.5 . . ? 
N7 C61 N8 104.96(15) . . ? 
N7 C61 Ni2 123.29(13) . . ? 
N8 C61 Ni2 131.15(13) . . ? 
C63 C62 N7 107.22(15) . . ? 
C63 C62 H62 126.4 . . ? 
N7 C62 H62 126.4 . . ? 
C62 C63 N8 107.43(16) . . ? 
C62 C63 H63 126.3 . . ? 
N8 C63 H63 126.3 . . ? 
C69 C64 C65 123.01(17) . . ? 
C69 C64 N7 118.84(16) . . ? 
C65 C64 N7 118.14(16) . . ? 
O4 C65 C64 122.38(16) . . ? 
O4 C65 C66 121.21(16) . . ? 
C64 C65 C66 116.40(16) . . ? 
C67 C66 C65 118.62(17) . . ? 
C67 C66 C70 121.36(17) . . ? 
C65 C66 C70 120.01(16) . . ? 
C66 C67 C68 124.48(18) . . ? 
C66 C67 H67 117.8 . . ? 
C68 C67 H67 117.8 . . ? 
C69 C68 C67 116.95(17) . . ? 
C69 C68 C74 123.52(18) . . ? 
C67 C68 C74 119.53(17) . . ? 
C68 C69 C64 120.46(17) . . ? 
C68 C69 H69 119.8 . . ? 
C64 C69 H69 119.8 . . ? 
C73 C70 C72 107.09(17) . . ? 
C73 C70 C66 112.26(17) . . ? 
C72 C70 C66 110.11(17) . . ? 
C73 C70 C71 107.49(18) . . ? 
C72 C70 C71 110.54(18) . . ? 
C66 C70 C71 109.31(16) . . ? 
C70 C71 H71A 109.5 . . ? 
C70 C71 H71B 109.5 . . ? 
H71A C71 H71B 109.5 . . ? 
C70 C71 H71C 109.5 . . ? 
H71A C71 H71C 109.5 . . ? 
H71B C71 H71C 109.5 . . ? 
C70 C72 H72A 109.5 . . ? 
C70 C72 H72B 109.5 . . ? 
H72A C72 H72B 109.5 . . ? 
C70 C72 H72C 109.5 . . ? 
H72A C72 H72C 109.5 . . ? 
H72B C72 H72C 109.5 . . ? 
C70 C73 H73A 109.5 . . ? 
C70 C73 H73B 109.5 . . ? 
H73A C73 H73B 109.5 . . ? 
C70 C73 H73C 109.5 . . ? 
H73A C73 H73C 109.5 . . ? 
H73B C73 H73C 109.5 . . ? 
C77 C74 C75 108.2(2) . . ? 
C77 C74 C68 111.84(17) . . ? 
C75 C74 C68 109.72(19) . . ? 
C77 C74 C76 109.4(2) . . ? 
C75 C74 C76 108.86(19) . . ? 
C68 C74 C76 108.76(18) . . ? 
C74 C75 H75A 109.5 . . ? 
C74 C75 H75B 109.5 . . ? 
H75A C75 H75B 109.5 . . ? 
C74 C75 H75C 109.5 . . ? 
H75A C75 H75C 109.5 . . ? 
H75B C75 H75C 109.5 . . ? 
C74 C76 H76A 109.5 . . ? 
C74 C76 H76B 109.5 . . ? 
H76A C76 H76B 109.5 . . ? 
C74 C76 H76C 109.5 . . ? 
H76A C76 H76C 109.5 . . ? 
H76B C76 H76C 109.5 . . ? 
C74 C77 H77A 109.5 . . ? 
C74 C77 H77B 109.5 . . ? 
H77A C77 H77B 109.5 . . ? 
C74 C77 H77C 109.5 . . ? 
H77A C77 H77C 109.5 . . ? 
H77B C77 H77C 109.5 . . ? 
N8 C78 C80 109.95(15) . . ? 
N8 C78 C79 111.01(15) . . ? 
C80 C78 C79 110.83(18) . . ? 
N8 C78 H78 108.3 . . ? 
C80 C78 H78 108.3 . . ? 
C79 C78 H78 108.3 . . ? 
C78 C79 H79A 109.5 . . ? 
C78 C79 H79B 109.5 . . ? 
H79A C79 H79B 109.5 . . ? 
C78 C79 H79C 109.5 . . ? 
H79A C79 H79C 109.5 . . ? 
H79B C79 H79C 109.5 . . ? 
C78 C80 H80A 109.5 . . ? 
C78 C80 H80B 109.5 . . ? 
H80A C80 H80B 109.5 . . ? 
C78 C80 H80C 109.5 . . ? 
H80A C80 H80C 109.5 . . ? 
H80B C80 H80C 109.5 . . ? 
C83 C82 C87 120.0 . . ? 
C83 C82 C81 120.7(3) . . ? 
C87 C82 C81 119.3(3) . . ? 
C84 C83 C82 120.0 . . ? 
C84 C83 H83 120.0 . . ? 
C82 C83 H83 120.0 . . ? 
C83 C84 C85 120.0 . . ? 
C83 C84 H84 120.0 . . ? 
C85 C84 H84 120.0 . . ? 
C84 C85 C86 120.0 . . ? 
C84 C85 H85 120.0 . . ? 
C86 C85 H85 120.0 . . ? 
C87 C86 C85 120.0 . . ? 
C87 C86 H86 120.0 . . ? 
C85 C86 H86 120.0 . . ? 
C86 C87 C82 120.0 . . ? 
C86 C87 H87 120.0 . . ? 
C82 C87 H87 120.0 . . ? 
C89 C88 H88A 109.5 . . ? 
C89 C88 H88B 109.5 . . ? 
H88A C88 H88B 109.5 . . ? 
C89 C88 H88C 109.5 . . ? 
H88A C88 H88C 109.5 . . ? 
H88B C88 H88C 109.5 . . ? 
C90 C89 C94 120.0 . . ? 
C90 C89 C88 118.9(4) . . ? 
C94 C89 C88 121.1(4) . . ? 
C91 C90 C89 120.0 . . ? 
C91 C90 H90 120.0 . . ? 
C89 C90 H90 120.0 . . ? 
C90 C91 C92 120.0 . . ? 
C90 C91 H91 120.0 . . ? 
C92 C91 H91 120.0 . . ? 
C93 C92 C91 120.0 . . ? 
C93 C92 H92 120.0 . . ? 
C91 C92 H92 120.0 . . ? 
C92 C93 C94 120.0 . . ? 
C92 C93 H93 120.0 . . ? 
C94 C93 H93 120.0 . . ? 
C93 C94 C89 120.0 . . ? 
C93 C94 H94 120.0 . . ? 
C89 C94 H94 120.0 . . ? 
C97 C96 C101 120.0 . . ? 
C97 C96 C95 119.8(3) . . ? 
C101 C96 C95 120.2(3) . . ? 
C96 C97 C98 120.0 . . ? 
C96 C97 H97 120.0 . . ? 
C98 C97 H97 120.0 . . ? 
C99 C98 C97 120.0 . . ? 
C99 C98 H98 120.0 . . ? 
C97 C98 H98 120.0 . . ? 
C98 C99 C100 120.0 . . ? 
C98 C99 H99 120.0 . . ? 
C100 C99 H99 120.0 . . ? 
C101 C100 C99 120.0 . . ? 
C101 C100 H100 120.0 . . ? 
C99 C100 H100 120.0 . . ? 
C100 C101 C96 120.0 . . ? 
C100 C101 H101 120.0 . . ? 
C96 C101 H101 120.0 . . ? 
C103 C102 H10A 109.5 . . ? 
C103 C102 H10B 109.5 . . ? 
H10A C102 H10B 109.5 . . ? 
C103 C102 H10C 109.5 . . ? 
H10A C102 H10C 109.5 . . ? 
H10B C102 H10C 109.5 . . ? 
C104 C103 C108 120.0 . . ? 
C104 C103 C102 119.9(4) . . ? 
C108 C103 C102 120.0(4) . . ? 
C105 C104 C103 120.0 . . ? 
C105 C104 H104 120.0 . . ? 
C103 C104 H104 120.0 . . ? 
C106 C105 C104 120.0 . . ? 
C106 C105 H105 120.0 . . ? 
C104 C105 H105 120.0 . . ? 
C105 C106 C107 120.0 . . ? 
C105 C106 H106 120.0 . . ? 
C107 C106 H106 120.0 . . ? 
C106 C107 C108 120.0 . . ? 
C106 C107 H107 120.0 . . ? 
C108 C107 H107 120.0 . . ? 
C107 C108 C103 120.0 . . ? 
C107 C108 H108 120.0 . . ? 
C103 C108 H108 120.0 . . ? 
  
loop_ 
 _geom_torsion_atom_site_label_1 
 _geom_torsion_atom_site_label_2 
 _geom_torsion_atom_site_label_3 
 _geom_torsion_atom_site_label_4 
 _geom_torsion 
 _geom_torsion_site_symmetry_1 
 _geom_torsion_site_symmetry_2 
 _geom_torsion_site_symmetry_3 
 _geom_torsion_site_symmetry_4 
 _geom_torsion_publ_flag 
C1 Ni1 O1 C5 57.39(14) . . . . ? 
C21 Ni1 O1 C5 -52.4(3) . . . . ? 
O2 Ni1 O1 C5 -138.73(13) . . . . ? 
C1 Ni1 O2 C25 -72.4(3) . . . . ? 
C21 Ni1 O2 C25 48.33(14) . . . . ? 
O1 Ni1 O2 C25 -152.36(13) . . . . ? 
C41 Ni2 O3 C45 51.08(14) . . . . ? 
C61 Ni2 O3 C45 -59.0(3) . . . . ? 
O4 Ni2 O3 C45 -139.33(14) . . . . ? 
C41 Ni2 O4 C65 -77.2(4) . . . . ? 
C61 Ni2 O4 C65 46.49(14) . . . . ? 
O3 Ni2 O4 C65 -145.72(14) . . . . ? 
C3 N1 C1 N2 -0.4(2) . . . . ? 
C4 N1 C1 N2 -178.34(16) . . . . ? 
C3 N1 C1 Ni1 170.43(13) . . . . ? 
C4 N1 C1 Ni1 -7.5(2) . . . . ? 
C2 N2 C1 N1 0.3(2) . . . . ? 
C18 N2 C1 N1 179.59(16) . . . . ? 
C2 N2 C1 Ni1 -169.30(15) . . . . ? 
C18 N2 C1 Ni1 9.9(3) . . . . ? 
C21 Ni1 C1 N1 129.34(15) . . . . ? 
O2 Ni1 C1 N1 -111.0(2) . . . . ? 
O1 Ni1 C1 N1 -30.99(15) . . . . ? 
C21 Ni1 C1 N2 -62.57(19) . . . . ? 
O2 Ni1 C1 N2 57.1(4) . . . . ? 
O1 Ni1 C1 N2 137.10(18) . . . . ? 
C1 N2 C2 C3 -0.2(2) . . . . ? 
C18 N2 C2 C3 -179.40(17) . . . . ? 
N2 C2 C3 N1 -0.1(2) . . . . ? 
C1 N1 C3 C2 0.3(2) . . . . ? 
C4 N1 C3 C2 178.16(18) . . . . ? 
C1 N1 C4 C9 -145.65(19) . . . . ? 
C3 N1 C4 C9 36.8(3) . . . . ? 
C1 N1 C4 C5 34.1(3) . . . . ? 
C3 N1 C4 C5 -143.50(19) . . . . ? 
Ni1 O1 C5 C4 -47.5(2) . . . . ? 
Ni1 O1 C5 C6 133.70(17) . . . . ? 
C9 C4 C5 O1 176.34(19) . . . . ? 
N1 C4 C5 O1 -3.4(3) . . . . ? 
C9 C4 C5 C6 -4.8(3) . . . . ? 
N1 C4 C5 C6 175.48(17) . . . . ? 
O1 C5 C6 C7 -177.92(19) . . . . ? 
C4 C5 C6 C7 3.2(3) . . . . ? 
O1 C5 C6 C10 -1.6(3) . . . . ? 
C4 C5 C6 C10 179.56(18) . . . . ? 
C5 C6 C7 C8 0.1(3) . . . . ? 
C10 C6 C7 C8 -176.2(2) . . . . ? 
C6 C7 C8 C9 -2.2(4) . . . . ? 
C6 C7 C8 C14 175.5(2) . . . . ? 
C5 C4 C9 C8 2.8(3) . . . . ? 
N1 C4 C9 C8 -177.45(19) . . . . ? 
C7 C8 C9 C4 0.8(3) . . . . ? 
C14 C8 C9 C4 -177.0(2) . . . . ? 
C7 C6 C10 C12 -129.6(2) . . . . ? 
C5 C6 C10 C12 54.2(3) . . . . ? 
C7 C6 C10 C11 110.2(2) . . . . ? 
C5 C6 C10 C11 -66.0(2) . . . . ? 
C7 C6 C10 C13 -9.5(3) . . . . ? 
C5 C6 C10 C13 174.3(2) . . . . ? 
C9 C8 C14 C15' 64.4(5) . . . . ? 
C7 C8 C14 C15' -113.3(5) . . . . ? 
C9 C8 C14 C17 -121.9(3) . . . . ? 
C7 C8 C14 C17 60.5(4) . . . . ? 
C9 C8 C14 C17' -64.5(4) . . . . ? 
C7 C8 C14 C17' 117.9(3) . . . . ? 
C9 C8 C14 C16 112.6(3) . . . . ? 
C7 C8 C14 C16 -65.0(4) . . . . ? 
C9 C8 C14 C15 -0.9(3) . . . . ? 
C7 C8 C14 C15 -178.5(3) . . . . ? 
C9 C8 C14 C16' -174.1(4) . . . . ? 
C7 C8 C14 C16' 8.3(4) . . . . ? 
C1 N2 C18 C20 112.4(2) . . . . ? 
C2 N2 C18 C20 -68.5(2) . . . . ? 
C1 N2 C18 C19 -123.5(2) . . . . ? 
C2 N2 C18 C19 55.6(2) . . . . ? 
C22 N3 C21 N4 -1.47(19) . . . . ? 
C24 N3 C21 N4 -176.51(15) . . . . ? 
C22 N3 C21 Ni1 161.96(13) . . . . ? 
C24 N3 C21 Ni1 -13.1(2) . . . . ? 
C23 N4 C21 N3 1.64(19) . . . . ? 
C38 N4 C21 N3 171.84(16) . . . . ? 
C23 N4 C21 Ni1 -160.75(14) . . . . ? 
C38 N4 C21 Ni1 9.4(3) . . . . ? 
C1 Ni1 C21 N3 145.05(15) . . . . ? 
O2 Ni1 C21 N3 -20.77(15) . . . . ? 
O1 Ni1 C21 N3 -106.9(2) . . . . ? 
C1 Ni1 C21 N4 -55.66(17) . . . . ? 
O2 Ni1 C21 N4 138.52(16) . . . . ? 
O1 Ni1 C21 N4 52.4(3) . . . . ? 
C21 N3 C22 C23 0.7(2) . . . . ? 
C24 N3 C22 C23 175.63(16) . . . . ? 
N3 C22 C23 N4 0.3(2) . . . . ? 
C21 N4 C23 C22 -1.2(2) . . . . ? 
C38 N4 C23 C22 -171.42(17) . . . . ? 
C21 N3 C24 C29 -150.73(17) . . . . ? 
C22 N3 C24 C29 35.0(3) . . . . ? 
C21 N3 C24 C25 31.0(2) . . . . ? 
C22 N3 C24 C25 -143.26(17) . . . . ? 
Ni1 O2 C25 C24 -43.7(2) . . . . ? 
Ni1 O2 C25 C26 137.27(15) . . . . ? 
C29 C24 C25 O2 -179.12(17) . . . . ? 
N3 C24 C25 O2 -1.0(3) . . . . ? 
C29 C24 C25 C26 -0.1(3) . . . . ? 
N3 C24 C25 C26 178.08(16) . . . . ? 
O2 C25 C26 C27 177.88(17) . . . . ? 
C24 C25 C26 C27 -1.2(3) . . . . ? 
O2 C25 C26 C30 -4.2(3) . . . . ? 
C24 C25 C26 C30 176.72(17) . . . . ? 
C25 C26 C27 C28 1.7(3) . . . . ? 
C30 C26 C27 C28 -176.17(18) . . . . ? 
C26 C27 C28 C29 -0.8(3) . . . . ? 
C26 C27 C28 C34 177.05(18) . . . . ? 
C25 C24 C29 C28 1.0(3) . . . . ? 
N3 C24 C29 C28 -177.15(17) . . . . ? 
C27 C28 C29 C24 -0.5(3) . . . . ? 
C34 C28 C29 C24 -178.30(17) . . . . ? 
C27 C26 C30 C31 119.3(2) . . . . ? 
C25 C26 C30 C31 -58.5(2) . . . . ? 
C27 C26 C30 C33 -0.1(3) . . . . ? 
C25 C26 C30 C33 -177.96(18) . . . . ? 
C27 C26 C30 C32 -119.8(2) . . . . ? 
C25 C26 C30 C32 62.4(2) . . . . ? 
C29 C28 C34 C35 -1.2(3) . . . . ? 
C27 C28 C34 C35 -178.9(2) . . . . ? 
C29 C28 C34 C36 118.1(2) . . . . ? 
C27 C28 C34 C36 -59.6(2) . . . . ? 
C29 C28 C34 C37 -122.4(2) . . . . ? 
C27 C28 C34 C37 59.9(3) . . . . ? 
C21 N4 C38 C39 146.97(18) . . . . ? 
C23 N4 C38 C39 -44.2(2) . . . . ? 
C21 N4 C38 C40 -87.8(2) . . . . ? 
C23 N4 C38 C40 81.0(2) . . . . ? 
C42 N5 C41 N6 0.6(2) . . . . ? 
C44 N5 C41 N6 -169.95(16) . . . . ? 
C42 N5 C41 Ni2 176.99(13) . . . . ? 
C44 N5 C41 Ni2 6.4(3) . . . . ? 
C43 N6 C41 N5 -0.1(2) . . . . ? 
C58 N6 C41 N5 170.03(15) . . . . ? 
C43 N6 C41 Ni2 -176.01(14) . . . . ? 
C58 N6 C41 Ni2 -5.9(3) . . . . ? 
C61 Ni2 C41 N5 132.20(16) . . . . ? 
O4 Ni2 C41 N5 -104.6(4) . . . . ? 
O3 Ni2 C41 N5 -36.10(15) . . . . ? 
C61 Ni2 C41 N6 -52.49(18) . . . . ? 
O4 Ni2 C41 N6 70.7(4) . . . . ? 
O3 Ni2 C41 N6 139.21(17) . . . . ? 
C41 N5 C42 C43 -1.0(2) . . . . ? 
C44 N5 C42 C43 169.50(17) . . . . ? 
N5 C42 C43 N6 0.9(2) . . . . ? 
C41 N6 C43 C42 -0.5(2) . . . . ? 
C58 N6 C43 C42 -170.55(17) . . . . ? 
C41 N5 C44 C49 -159.65(18) . . . . ? 
C42 N5 C44 C49 31.2(3) . . . . ? 
C41 N5 C44 C45 24.5(3) . . . . ? 
C42 N5 C44 C45 -144.67(18) . . . . ? 
Ni2 O3 C45 C44 -36.0(2) . . . . ? 
Ni2 O3 C45 C46 145.39(14) . . . . ? 
C49 C44 C45 O3 176.07(17) . . . . ? 
N5 C44 C45 O3 -8.3(3) . . . . ? 
C49 C44 C45 C46 -5.2(3) . . . . ? 
N5 C44 C45 C46 170.45(16) . . . . ? 
O3 C45 C46 C47 -177.77(17) . . . . ? 
C44 C45 C46 C47 3.5(3) . . . . ? 
O3 C45 C46 C50 2.3(3) . . . . ? 
C44 C45 C46 C50 -176.37(16) . . . . ? 
C45 C46 C47 C48 0.1(3) . . . . ? 
C50 C46 C47 C48 179.97(18) . . . . ? 
C46 C47 C48 C49 -2.2(3) . . . . ? 
C46 C47 C48 C54 178.16(18) . . . . ? 
C47 C48 C49 C44 0.6(3) . . . . ? 
C54 C48 C49 C44 -179.82(18) . . . . ? 
C45 C44 C49 C48 3.2(3) . . . . ? 
N5 C44 C49 C48 -172.39(17) . . . . ? 
C47 C46 C50 C52 0.1(3) . . . . ? 
C45 C46 C50 C52 179.94(17) . . . . ? 
C47 C46 C50 C51 -120.18(19) . . . . ? 
C45 C46 C50 C51 59.7(2) . . . . ? 
C47 C46 C50 C53 119.26(19) . . . . ? 
C45 C46 C50 C53 -60.9(2) . . . . ? 
C49 C48 C54 C57 0.9(3) . . . . ? 
C47 C48 C54 C57 -179.48(19) . . . . ? 
C49 C48 C54 C55 121.3(2) . . . . ? 
C47 C48 C54 C55 -59.1(2) . . . . ? 
C49 C48 C54 C56 -119.0(2) . . . . ? 
C47 C48 C54 C56 60.6(2) . . . . ? 
C41 N6 C58 C59 156.45(18) . . . . ? 
C43 N6 C58 C59 -34.9(2) . . . . ? 
C41 N6 C58 C60 -79.7(2) . . . . ? 
C43 N6 C58 C60 89.0(2) . . . . ? 
C62 N7 C61 N8 0.2(2) . . . . ? 
C64 N7 C61 N8 -175.59(16) . . . . ? 
C62 N7 C61 Ni2 172.22(14) . . . . ? 
C64 N7 C61 Ni2 -3.5(3) . . . . ? 
C63 N8 C61 N7 -0.1(2) . . . . ? 
C78 N8 C61 N7 173.03(16) . . . . ? 
C63 N8 C61 Ni2 -171.25(14) . . . . ? 
C78 N8 C61 Ni2 1.9(3) . . . . ? 
C41 Ni2 C61 N7 144.88(16) . . . . ? 
O4 Ni2 C61 N7 -25.78(16) . . . . ? 
O3 Ni2 C61 N7 -105.8(3) . . . . ? 
C41 Ni2 C61 N8 -45.35(18) . . . . ? 
O4 Ni2 C61 N8 143.99(17) . . . . ? 
O3 Ni2 C61 N8 64.0(4) . . . . ? 
C61 N7 C62 C63 -0.2(2) . . . . ? 
C64 N7 C62 C63 175.55(17) . . . . ? 
N7 C62 C63 N8 0.1(2) . . . . ? 
C61 N8 C63 C62 0.0(2) . . . . ? 
C78 N8 C63 C62 -173.23(17) . . . . ? 
C61 N7 C64 C69 -155.62(19) . . . . ? 
C62 N7 C64 C69 29.2(3) . . . . ? 
C61 N7 C64 C65 25.5(3) . . . . ? 
C62 N7 C64 C65 -149.66(18) . . . . ? 
Ni2 O4 C65 C64 -37.9(2) . . . . ? 
Ni2 O4 C65 C66 143.29(14) . . . . ? 
C69 C64 C65 O4 177.70(18) . . . . ? 
N7 C64 C65 O4 -3.5(3) . . . . ? 
C69 C64 C65 C66 -3.4(3) . . . . ? 
N7 C64 C65 C66 175.44(16) . . . . ? 
O4 C65 C66 C67 -178.62(17) . . . . ? 
C64 C65 C66 C67 2.5(3) . . . . ? 
O4 C65 C66 C70 0.2(3) . . . . ? 
C64 C65 C66 C70 -178.76(17) . . . . ? 
C65 C66 C67 C68 -0.1(3) . . . . ? 
C70 C66 C67 C68 -178.8(2) . . . . ? 
C66 C67 C68 C69 -1.6(3) . . . . ? 
C66 C67 C68 C74 178.0(2) . . . . ? 
C67 C68 C69 C64 0.7(3) . . . . ? 
C74 C68 C69 C64 -178.8(2) . . . . ? 
C65 C64 C69 C68 1.8(3) . . . . ? 
N7 C64 C69 C68 -176.99(18) . . . . ? 
C67 C66 C70 C73 0.1(3) . . . . ? 
C65 C66 C70 C73 -178.69(19) . . . . ? 
C67 C66 C70 C72 -119.2(2) . . . . ? 
C65 C66 C70 C72 62.1(2) . . . . ? 
C67 C66 C70 C71 119.2(2) . . . . ? 
C65 C66 C70 C71 -59.5(2) . . . . ? 
C69 C68 C74 C77 3.3(3) . . . . ? 
C67 C68 C74 C77 -176.2(2) . . . . ? 
C69 C68 C74 C75 123.3(2) . . . . ? 
C67 C68 C74 C75 -56.2(3) . . . . ? 
C69 C68 C74 C76 -117.7(2) . . . . ? 
C67 C68 C74 C76 62.8(3) . . . . ? 
C61 N8 C78 C80 -66.0(2) . . . . ? 
C63 N8 C78 C80 106.2(2) . . . . ? 
C61 N8 C78 C79 170.97(18) . . . . ? 
C63 N8 C78 C79 -16.9(3) . . . . ? 
C87 C82 C83 C84 0.0 . . . . ? 
C81 C82 C83 C84 179.3(5) . . . . ? 
C82 C83 C84 C85 0.0 . . . . ? 
C83 C84 C85 C86 0.0 . . . . ? 
C84 C85 C86 C87 0.0 . . . . ? 
C85 C86 C87 C82 0.0 . . . . ? 
C83 C82 C87 C86 0.0 . . . . ? 
C81 C82 C87 C86 -179.3(5) . . . . ? 
C94 C89 C90 C91 0.0 . . . . ? 
C88 C89 C90 C91 178.4(8) . . . . ? 
C89 C90 C91 C92 0.0 . . . . ? 
C90 C91 C92 C93 0.0 . . . . ? 
C91 C92 C93 C94 0.0 . . . . ? 
C92 C93 C94 C89 0.0 . . . . ? 
C90 C89 C94 C93 0.0 . . . . ? 
C88 C89 C94 C93 -178.4(8) . . . . ? 
C101 C96 C97 C98 0.0 . . . . ? 
C95 C96 C97 C98 177.5(6) . . . . ? 
C96 C97 C98 C99 0.0 . . . . ? 
C97 C98 C99 C100 0.0 . . . . ? 
C98 C99 C100 C101 0.0 . . . . ? 
C99 C100 C101 C96 0.0 . . . . ? 
C97 C96 C101 C100 0.0 . . . . ? 
C95 C96 C101 C100 -177.5(6) . . . . ? 
C108 C103 C104 C105 0.0 . . . . ? 
C102 C103 C104 C105 175.9(8) . . . . ? 
C103 C104 C105 C106 0.0 . . . . ? 
C104 C105 C106 C107 0.0 . . . . ? 
C105 C106 C107 C108 0.0 . . . . ? 
C106 C107 C108 C103 0.0 . . . . ? 
C104 C103 C108 C107 0.0 . . . . ? 
C102 C103 C108 C107 -175.9(8) . . . . ? 
  
_diffrn_measured_fraction_theta_max    0.973 
_diffrn_reflns_theta_full              72.80 
_diffrn_measured_fraction_theta_full   0.973 
_refine_diff_density_max    0.536 
_refine_diff_density_min   -0.460 
_refine_diff_density_rms    0.064 


#===END

  
data_r060429a 
  
_audit_creation_method            SHELXL-97 
_chemical_name_systematic 
; 
 ? 
; 
_chemical_name_common             ? 
_chemical_melting_point           ? 
_chemical_formula_moiety          'C44 H66 Cl4 N4 Ni O2' 
_chemical_formula_sum 
 'C44 H66 Cl4 N4 Ni O2' 
_chemical_formula_weight          883.52 
  
loop_ 
 _atom_type_symbol 
 _atom_type_description 
 _atom_type_scat_dispersion_real 
 _atom_type_scat_dispersion_imag 
 _atom_type_scat_source 
 'C'  'C'   0.0033   0.0016 
 'International Tables Vol C Tables 4.2.6.8 and 6.1.1.4' 
 'H'  'H'   0.0000   0.0000 
 'International Tables Vol C Tables 4.2.6.8 and 6.1.1.4' 
 'N'  'N'   0.0061   0.0033 
 'International Tables Vol C Tables 4.2.6.8 and 6.1.1.4' 
 'Ni'  'Ni'   0.3393   1.1124 
 'International Tables Vol C Tables 4.2.6.8 and 6.1.1.4' 
 'O'  'O'   0.0106   0.0060 
 'International Tables Vol C Tables 4.2.6.8 and 6.1.1.4' 
 'Cl'  'Cl'   0.1484   0.1585 
 'International Tables Vol C Tables 4.2.6.8 and 6.1.1.4' 
  
_symmetry_cell_setting            orthorhombic 
_symmetry_space_group_name_H-M    'P 21 21 21' 
  
loop_ 
 _symmetry_equiv_pos_as_xyz 
 'x, y, z' 
 'x+1/2, -y+1/2, -z' 
 '-x, y+1/2, -z+1/2' 
 '-x+1/2, -y, z+1/2' 
  
_cell_length_a                    12.3845(13) 
_cell_length_b                    17.0235(18) 
_cell_length_c                    21.782(2) 
_cell_angle_alpha                 90.00 
_cell_angle_beta                  90.00 
_cell_angle_gamma                 90.00 
_cell_volume                      4592.2(8) 
_cell_formula_units_Z             4 
_cell_measurement_temperature     113(2) 
_cell_measurement_reflns_used     15175 
_cell_measurement_theta_min       1.5 
_cell_measurement_theta_max       27.9 
  
_exptl_crystal_description        block 
_exptl_crystal_colour             yellow
_exptl_crystal_size_max           0.20 
_exptl_crystal_size_mid           0.20 
_exptl_crystal_size_min           0.20 
_exptl_crystal_density_meas       ? 
_exptl_crystal_density_diffrn     1.278 
_exptl_crystal_density_method     'not measured' 
_exptl_crystal_F_000              1880 
_exptl_absorpt_coefficient_mu     0.694 
_exptl_absorpt_correction_type    numerical 
_exptl_absorpt_correction_T_min   0.8736 
_exptl_absorpt_correction_T_max   0.8736 
_exptl_absorpt_process_details     
; 
    ENTER TEXT OF LETTER 
; 
  
_exptl_special_details 
; 
 ? 
; 
  
_diffrn_ambient_temperature       113(2) 
_diffrn_radiation_wavelength      0.71070 
_diffrn_radiation_type            MoK\a 
_diffrn_radiation_source          'rotating anode' 
_diffrn_radiation_monochromator   confocal 
_diffrn_measurement_device_type   'Rigaku Saturn' 
_diffrn_measurement_method        \w 
_diffrn_detector_area_resol_mean  7.31 
_diffrn_standards_number          ? 
_diffrn_standards_interval_count  ? 
_diffrn_standards_interval_time   ? 
_diffrn_standards_decay_%         ? 
_diffrn_reflns_number             18702 
_diffrn_reflns_av_R_equivalents   0.0369 
_diffrn_reflns_av_sigmaI/netI     0.0880 
_diffrn_reflns_limit_h_min        -8 
_diffrn_reflns_limit_h_max        16 
_diffrn_reflns_limit_k_min        -22 
_diffrn_reflns_limit_k_max        22 
_diffrn_reflns_limit_l_min        -22 
_diffrn_reflns_limit_l_max        28 
_diffrn_reflns_theta_min          3.04 
_diffrn_reflns_theta_max          27.49 
_reflns_number_total              10445 
_reflns_number_gt                 8269 
_reflns_threshold_expression      >2sigma(I) 
  
_computing_data_collection        'CrystalClear (Rigaku/MSC Inc., 2005)'
_computing_cell_refinement        'CrystalClear (Rigaku/MSC Inc., 2005)'
_computing_data_reduction         'CrystalClear (Rigaku/MSC Inc., 2005)'
_computing_structure_solution     'SHELXS-97 (Sheldrick, 1990)' 
_computing_structure_refinement   'SHELXL-97 (Sheldrick, 1997)' 
_computing_molecular_graphics     ? 
_computing_publication_material   'CrystalStructure 3.7.0' 
  
_refine_special_details 
; 
 Refinement of F^2^ against ALL reflections.  The weighted R-factor wR and 
 goodness of fit S are based on F^2^, conventional R-factors R are based 
 on F, with F set to zero for negative F^2^. The threshold expression of 
 F^2^ > 2sigma(F^2^) is used only for calculating R-factors(gt) etc. and is 
 not relevant to the choice of reflections for refinement.  R-factors based 
 on F^2^ are statistically about twice as large as those based on F, and R- 
 factors based on ALL data will be even larger. 
; 
  
_refine_ls_structure_factor_coef  Fsqd 
_refine_ls_matrix_type            full 
_refine_ls_weighting_scheme       calc 
_refine_ls_weighting_details 
 'calc w=1/[\s^2^(Fo^2^)+(0.0142P)^2^+0.0000P] where P=(Fo^2^+2Fc^2^)/3' 
_atom_sites_solution_primary      direct 
_atom_sites_solution_secondary    difmap 
_atom_sites_solution_hydrogens    geom 
_refine_ls_hydrogen_treatment     constr
_refine_ls_extinction_method      none 
_refine_ls_extinction_coef        ? 
_refine_ls_abs_structure_details 
 'Flack H D (1983), Acta Cryst. A39, 876-881' 
_refine_ls_abs_structure_Flack    0.012(8) 
_refine_ls_number_reflns          10445 
_refine_ls_number_parameters      524 
_refine_ls_number_restraints      42 
_refine_ls_R_factor_all           0.0460 
_refine_ls_R_factor_gt            0.0349 
_refine_ls_wR_factor_ref          0.0623 
_refine_ls_wR_factor_gt           0.0581 
_refine_ls_goodness_of_fit_ref    0.930 
_refine_ls_restrained_S_all       0.946 
_refine_ls_shift/su_max           0.001 
_refine_ls_shift/su_mean          0.000 
  
loop_ 
 _atom_site_label 
 _atom_site_type_symbol 
 _atom_site_fract_x 
 _atom_site_fract_y 
 _atom_site_fract_z 
 _atom_site_U_iso_or_equiv 
 _atom_site_adp_type 
 _atom_site_occupancy 
 _atom_site_symmetry_multiplicity 
 _atom_site_calc_flag 
 _atom_site_refinement_flags 
 _atom_site_disorder_assembly 
 _atom_site_disorder_group 
Ni1 Ni 0.05897(2) 0.901436(16) 0.215655(12) 0.01229(6) Uani 1 1 d . . . 
Cl1 Cl 0.27216(5) 0.12705(4) 0.20108(3) 0.02930(16) Uani 1 1 d . . . 
Cl2 Cl 0.46519(5) 0.02990(4) 0.18427(3) 0.03594(17) Uani 1 1 d . . . 
O1 O 0.12968(12) 0.80834(9) 0.24421(6) 0.0139(4) Uani 1 1 d . . . 
O2 O 0.16027(12) 0.90943(9) 0.15121(6) 0.0151(3) Uani 1 1 d . . . 
N1 N -0.03947(15) 0.84189(10) 0.32224(7) 0.0134(4) Uani 1 1 d . . . 
N2 N -0.16590(16) 0.86393(11) 0.25613(8) 0.0145(4) Uani 1 1 d . . . 
N3 N 0.01405(14) 1.03279(10) 0.14114(8) 0.0127(4) Uani 1 1 d . . . 
N4 N 0.00037(15) 1.07001(10) 0.23576(8) 0.0129(4) Uani 1 1 d . . . 
C1 C 0.14899(18) 0.81034(12) 0.30482(10) 0.0131(5) Uani 1 1 d . . . 
C2 C 0.06595(19) 0.82949(12) 0.34656(10) 0.0137(5) Uani 1 1 d . . . 
C3 C 0.08329(19) 0.83622(13) 0.40950(10) 0.0156(5) Uani 1 1 d . . . 
H3 H 0.0253 0.8506 0.4357 0.019 Uiso 1 1 calc R . . 
C4 C 0.18435(19) 0.82206(13) 0.43411(10) 0.0160(5) Uani 1 1 d . . . 
C5 C 0.2654(2) 0.79849(13) 0.39330(10) 0.0168(5) Uani 1 1 d . . . 
H5 H 0.3346 0.7868 0.4097 0.020 Uiso 1 1 calc R . . 
C6 C 0.25105(19) 0.79111(12) 0.32999(10) 0.0148(5) Uani 1 1 d . . . 
C7 C -0.05706(19) 0.87188(12) 0.26520(9) 0.0134(5) Uani 1 1 d . . . 
C8 C -0.13513(19) 0.81783(14) 0.34889(11) 0.0187(6) Uani 1 1 d . . . 
H8 H -0.1436 0.7958 0.3887 0.022 Uiso 1 1 calc R . . 
C9 C -0.21336(19) 0.83129(13) 0.30822(10) 0.0200(6) Uani 1 1 d . . . 
H9 H -0.2880 0.8206 0.3137 0.024 Uiso 1 1 calc R . . 
C10 C 0.2039(2) 0.83458(14) 0.50289(10) 0.0200(6) Uani 1 1 d . . . 
C11 C 0.3216(2) 0.81877(15) 0.52115(10) 0.0253(6) Uani 1 1 d . . . 
H11A H 0.3306 0.8282 0.5652 0.030 Uiso 1 1 calc R . . 
H11B H 0.3694 0.8539 0.4981 0.030 Uiso 1 1 calc R . . 
H11C H 0.3400 0.7641 0.5118 0.030 Uiso 1 1 calc R . . 
C12 C 0.1798(2) 0.92057(14) 0.51916(11) 0.0345(7) Uani 1 1 d . . . 
H12A H 0.1921 0.9289 0.5631 0.041 Uiso 1 1 calc R . . 
H12B H 0.1044 0.9326 0.5092 0.041 Uiso 1 1 calc R . . 
H12C H 0.2275 0.9551 0.4955 0.041 Uiso 1 1 calc R . . 
C13 C 0.1315(2) 0.78024(16) 0.54004(10) 0.0325(7) Uani 1 1 d . . . 
H13A H 0.1437 0.7892 0.5839 0.039 Uiso 1 1 calc R . . 
H13B H 0.1484 0.7255 0.5300 0.039 Uiso 1 1 calc R . . 
H13C H 0.0557 0.7910 0.5301 0.039 Uiso 1 1 calc R . . 
C14 C 0.34313(18) 0.76326(12) 0.28811(10) 0.0155(5) Uani 1 1 d . . . 
C15 C 0.3084(2) 0.68756(13) 0.25525(10) 0.0220(6) Uani 1 1 d . . . 
H15A H 0.3670 0.6695 0.2285 0.026 Uiso 1 1 calc R . . 
H15B H 0.2438 0.6979 0.2305 0.026 Uiso 1 1 calc R . . 
H15C H 0.2923 0.6469 0.2858 0.026 Uiso 1 1 calc R . . 
C16 C 0.44689(19) 0.74448(14) 0.32391(9) 0.0214(5) Uani 1 1 d . . . 
H16A H 0.5028 0.7266 0.2953 0.026 Uiso 1 1 calc R . . 
H16B H 0.4321 0.7031 0.3540 0.026 Uiso 1 1 calc R . . 
H16C H 0.4719 0.7918 0.3452 0.026 Uiso 1 1 calc R . . 
C17 C 0.37060(19) 0.82638(14) 0.24063(10) 0.0213(6) Uani 1 1 d . . . 
H17A H 0.4290 0.8076 0.2141 0.026 Uiso 1 1 calc R . . 
H17B H 0.3937 0.8744 0.2617 0.026 Uiso 1 1 calc R . . 
H17C H 0.3066 0.8377 0.2157 0.026 Uiso 1 1 calc R . . 
C18 C -0.22826(18) 0.88447(13) 0.19894(10) 0.0181(5) Uani 1 1 d . . . 
C19 C -0.33544(19) 0.83952(15) 0.19936(11) 0.0272(6) Uani 1 1 d . . . 
H19A H -0.3210 0.7829 0.1990 0.033 Uiso 1 1 calc R . . 
H19B H -0.3776 0.8538 0.1630 0.033 Uiso 1 1 calc R . . 
H19C H -0.3762 0.8531 0.2364 0.033 Uiso 1 1 calc R . . 
C20 C -0.25121(19) 0.97255(13) 0.19869(11) 0.0230(6) Uani 1 1 d . . . 
H20A H -0.2936 0.9864 0.2351 0.028 Uiso 1 1 calc R . . 
H20B H -0.2920 0.9863 0.1617 0.028 Uiso 1 1 calc R . . 
H20C H -0.1828 1.0015 0.1991 0.028 Uiso 1 1 calc R . . 
C21 C -0.16293(19) 0.85889(14) 0.14280(10) 0.0209(6) Uani 1 1 d . . . 
H21A H -0.1504 0.8021 0.1446 0.025 Uiso 1 1 calc R . . 
H21B H -0.0935 0.8864 0.1425 0.025 Uiso 1 1 calc R . . 
H21C H -0.2031 0.8717 0.1054 0.025 Uiso 1 1 calc R . . 
C22 C 0.12018(18) 0.92718(12) 0.09607(10) 0.0135(5) Uani 1 1 d . . . 
C23 C 0.04358(18) 0.98774(12) 0.08798(9) 0.0127(5) Uani 1 1 d . . . 
C24 C 0.00020(18) 1.00702(13) 0.03128(10) 0.0151(5) Uani 1 1 d . . . 
H24 H -0.0521 1.0477 0.0285 0.018 Uiso 1 1 calc R . . 
C25 C 0.03205(18) 0.96788(13) -0.02101(10) 0.0154(5) Uani 1 1 d . . . 
C26 C 0.10865(18) 0.90765(14) -0.01357(9) 0.0177(5) Uani 1 1 d . . . 
H26 H 0.1308 0.8796 -0.0491 0.021 Uiso 1 1 calc R . . 
C27 C 0.15385(18) 0.88659(13) 0.04219(9) 0.0150(5) Uani 1 1 d . . . 
C28 C 0.02045(17) 1.00584(12) 0.19972(10) 0.0129(5) Uani 1 1 d . . . 
C29 C -0.01535(17) 1.11176(12) 0.14042(10) 0.0156(5) Uani 1 1 d . . . 
H29 H -0.0271 1.1435 0.1052 0.019 Uiso 1 1 calc R . . 
C30 C -0.02386(17) 1.13411(13) 0.19936(10) 0.0167(5) Uani 1 1 d . . . 
H30 H -0.0431 1.1850 0.2135 0.020 Uiso 1 1 calc R . . 
C31 C -0.0123(2) 0.98587(15) -0.08521(11) 0.0230(6) Uani 1 1 d . . . 
C32 C -0.0850(2) 0.91828(15) -0.10570(12) 0.0396(8) Uani 1 1 d . . . 
H32A H -0.1131 0.9293 -0.1469 0.047 Uiso 1 1 calc R . . 
H32B H -0.1452 0.9128 -0.0769 0.047 Uiso 1 1 calc R . . 
H32C H -0.0431 0.8694 -0.1065 0.047 Uiso 1 1 calc R . . 
C33 C 0.0806(2) 0.99447(16) -0.13148(11) 0.0374(8) Uani 1 1 d . . . 
H33A H 0.0510 1.0056 -0.1723 0.045 Uiso 1 1 calc R . . 
H33B H 0.1222 0.9455 -0.1329 0.045 Uiso 1 1 calc R . . 
H33C H 0.1278 1.0377 -0.1188 0.045 Uiso 1 1 calc R . . 
C34 C -0.0762(2) 1.06225(15) -0.08716(11) 0.0381(8) Uani 1 1 d . . . 
H34A H -0.1026 1.0713 -0.1290 0.046 Uiso 1 1 calc R . . 
H34B H -0.0294 1.1059 -0.0748 0.046 Uiso 1 1 calc R . . 
H34C H -0.1376 1.0587 -0.0589 0.046 Uiso 1 1 calc R . . 
C35 C 0.2386(2) 0.82046(14) 0.04611(10) 0.0198(6) Uani 1 1 d . . . 
C36 C 0.1971(2) 0.75480(13) 0.08898(10) 0.0281(6) Uani 1 1 d . . . 
H36A H 0.1286 0.7343 0.0731 0.034 Uiso 1 1 calc R . . 
H36B H 0.1860 0.7761 0.1303 0.034 Uiso 1 1 calc R . . 
H36C H 0.2504 0.7123 0.0907 0.034 Uiso 1 1 calc R . . 
C37 C 0.34571(19) 0.85392(15) 0.06955(11) 0.0275(6) Uani 1 1 d . . . 
H37A H 0.3991 0.8116 0.0726 0.033 Uiso 1 1 calc R . . 
H37B H 0.3348 0.8775 0.1101 0.033 Uiso 1 1 calc R . . 
H37C H 0.3718 0.8941 0.0410 0.033 Uiso 1 1 calc R . . 
C38 C 0.2619(2) 0.78225(15) -0.01631(10) 0.0317(7) Uani 1 1 d . . . 
H38A H 0.1951 0.7597 -0.0329 0.038 Uiso 1 1 calc R . . 
H38B H 0.3158 0.7406 -0.0112 0.038 Uiso 1 1 calc R . . 
H38C H 0.2896 0.8220 -0.0448 0.038 Uiso 1 1 calc R . . 
C39 C 0.00859(18) 1.07567(12) 0.30480(10) 0.0154(5) Uani 1 1 d . . . 
C40 C 0.10439(18) 1.02763(13) 0.32715(9) 0.0186(5) Uani 1 1 d . . . 
H40A H 0.1705 1.0467 0.3074 0.022 Uiso 1 1 calc R . . 
H40B H 0.0933 0.9722 0.3166 0.022 Uiso 1 1 calc R . . 
H40C H 0.1111 1.0330 0.3718 0.022 Uiso 1 1 calc R . . 
C41 C -0.09812(19) 1.04879(14) 0.33376(10) 0.0206(6) Uani 1 1 d . . . 
H41A H -0.1573 1.0815 0.3183 0.025 Uiso 1 1 calc R . . 
H41B H -0.0936 1.0539 0.3785 0.025 Uiso 1 1 calc R . . 
H41C H -0.1116 0.9938 0.3230 0.025 Uiso 1 1 calc R . . 
C42 C 0.0293(2) 1.16200(13) 0.32174(10) 0.0210(6) Uani 1 1 d . . . 
H42A H -0.0313 1.1943 0.3076 0.025 Uiso 1 1 calc R . . 
H42B H 0.0960 1.1799 0.3020 0.025 Uiso 1 1 calc R . . 
H42C H 0.0364 1.1668 0.3664 0.025 Uiso 1 1 calc R . . 
C43 C 0.32703(18) 0.03105(13) 0.20344(12) 0.0242(6) Uani 1 1 d . . . 
H43A H 0.3176 0.0092 0.2452 0.029 Uiso 1 1 calc R . . 
H43B H 0.2870 -0.0029 0.1744 0.029 Uiso 1 1 calc R . . 
Cl3 Cl 0.59136(16) -0.05798(10) 0.03076(8) 0.0464(5) Uani 0.613(4) 1 d PDU A 1 
Cl4 Cl 0.6875(4) 0.0961(3) 0.0447(2) 0.0912(15) Uani 0.613(4) 1 d PDU A 1 
C44 C 0.6986(4) 0.0042(3) 0.0081(2) 0.0468(15) Uani 0.613(4) 1 d PDU A 1 
H44A H 0.7684 -0.0205 0.0190 0.056 Uiso 0.613(4) 1 calc PR A 1 
H44B H 0.6968 0.0115 -0.0370 0.056 Uiso 0.613(4) 1 calc PR A 1 
Cl3' Cl 0.6577(3) -0.06915(15) 0.01465(12) 0.0575(11) Uani 0.387(4) 1 d PDU A 2 
Cl4' Cl 0.6934(4) 0.0949(3) 0.0460(2) 0.0342(11) Uani 0.387(4) 1 d PDU A 2 
C44' C 0.5990(7) 0.0237(4) 0.0195(5) 0.075(3) Uani 0.387(4) 1 d PDU A 2 
H44C H 0.5367 0.0217 0.0480 0.090 Uiso 0.387(4) 1 calc PR A 2 
H44D H 0.5718 0.0394 -0.0214 0.090 Uiso 0.387(4) 1 calc PRU A 2 
  
loop_ 
 _atom_site_aniso_label 
 _atom_site_aniso_U_11 
 _atom_site_aniso_U_22 
 _atom_site_aniso_U_33 
 _atom_site_aniso_U_23 
 _atom_site_aniso_U_13 
 _atom_site_aniso_U_12 
Ni1 0.01324(14) 0.01119(13) 0.01244(13) 0.00070(12) 0.00115(13) 0.00076(13) 
Cl1 0.0288(4) 0.0234(3) 0.0357(4) 0.0064(3) 0.0071(3) 0.0039(3) 
Cl2 0.0210(3) 0.0337(4) 0.0530(4) 0.0026(3) 0.0059(3) 0.0015(3) 
O1 0.0165(9) 0.0146(8) 0.0106(8) 0.0012(6) -0.0022(7) 0.0040(7) 
O2 0.0161(8) 0.0173(8) 0.0118(8) 0.0016(7) 0.0011(6) 0.0028(8) 
N1 0.0140(10) 0.0149(10) 0.0115(9) 0.0019(8) 0.0023(8) -0.0015(9) 
N2 0.0150(10) 0.0148(10) 0.0136(10) 0.0011(8) -0.0015(8) -0.0005(9) 
N3 0.0156(10) 0.0092(9) 0.0133(10) 0.0015(8) -0.0003(8) 0.0018(8) 
N4 0.0137(10) 0.0113(9) 0.0136(10) 0.0018(8) 0.0008(8) 0.0012(8) 
C1 0.0197(12) 0.0065(11) 0.0130(12) 0.0004(9) -0.0014(10) -0.0029(10) 
C2 0.0166(12) 0.0092(11) 0.0154(11) 0.0031(9) -0.0026(11) -0.0004(10) 
C3 0.0199(13) 0.0136(11) 0.0134(11) 0.0011(10) 0.0049(10) -0.0007(10) 
C4 0.0230(13) 0.0139(12) 0.0111(12) 0.0031(10) -0.0022(11) -0.0046(11) 
C5 0.0191(13) 0.0138(12) 0.0176(13) 0.0021(10) -0.0020(10) -0.0023(11) 
C6 0.0161(12) 0.0096(11) 0.0186(12) 0.0004(10) -0.0013(10) -0.0007(10) 
C7 0.0178(12) 0.0104(10) 0.0119(10) -0.0011(8) 0.0007(10) 0.0031(11) 
C8 0.0198(13) 0.0213(14) 0.0150(12) 0.0050(11) 0.0054(11) -0.0009(11) 
C9 0.0168(13) 0.0210(13) 0.0223(13) 0.0014(11) 0.0026(11) -0.0027(11) 
C10 0.0252(14) 0.0219(14) 0.0129(12) 0.0026(11) -0.0033(11) -0.0038(12) 
C11 0.0296(15) 0.0309(15) 0.0153(13) 0.0008(12) -0.0091(12) -0.0061(13) 
C12 0.0522(19) 0.0292(17) 0.0221(14) -0.0091(12) -0.0101(14) 0.0019(15) 
C13 0.0354(17) 0.0462(18) 0.0160(13) 0.0027(13) -0.0028(12) -0.0136(15) 
C14 0.0168(12) 0.0151(11) 0.0147(12) -0.0013(11) -0.0012(11) 0.0027(10) 
C15 0.0260(14) 0.0162(13) 0.0239(14) -0.0042(11) -0.0007(12) 0.0038(12) 
C16 0.0197(13) 0.0251(13) 0.0193(12) -0.0008(10) -0.0031(12) 0.0062(12) 
C17 0.0179(13) 0.0251(14) 0.0210(13) -0.0013(11) -0.0012(11) 0.0014(11) 
C18 0.0157(12) 0.0192(13) 0.0194(12) 0.0058(10) -0.0049(10) -0.0004(10) 
C19 0.0179(13) 0.0323(15) 0.0314(15) 0.0072(12) -0.0078(12) -0.0051(12) 
C20 0.0206(13) 0.0238(14) 0.0246(14) 0.0034(12) -0.0044(11) 0.0022(11) 
C21 0.0247(14) 0.0174(13) 0.0207(13) 0.0004(11) -0.0045(11) 0.0001(11) 
C22 0.0147(12) 0.0120(11) 0.0139(12) 0.0024(9) 0.0006(10) -0.0016(10) 
C23 0.0138(12) 0.0142(11) 0.0099(11) -0.0012(9) 0.0029(10) -0.0003(10) 
C24 0.0152(12) 0.0134(12) 0.0168(12) 0.0045(10) -0.0005(10) -0.0007(10) 
C25 0.0180(13) 0.0176(12) 0.0106(11) -0.0001(10) -0.0021(10) -0.0018(10) 
C26 0.0224(12) 0.0182(12) 0.0125(11) -0.0034(11) 0.0038(10) -0.0055(11) 
C27 0.0170(12) 0.0151(13) 0.0129(11) 0.0011(10) 0.0033(10) -0.0014(10) 
C28 0.0116(11) 0.0157(12) 0.0115(11) 0.0017(9) 0.0018(9) -0.0009(10) 
C29 0.0177(12) 0.0132(12) 0.0158(12) 0.0031(10) -0.0008(10) 0.0019(10) 
C30 0.0164(12) 0.0125(11) 0.0211(13) 0.0009(10) 0.0009(10) 0.0011(10) 
C31 0.0292(15) 0.0262(14) 0.0136(12) -0.0020(11) -0.0048(11) 0.0032(12) 
C32 0.0465(19) 0.0385(18) 0.0337(16) -0.0069(13) -0.0199(14) -0.0036(15) 
C33 0.049(2) 0.0444(18) 0.0185(14) 0.0062(13) 0.0021(13) 0.0067(16) 
C34 0.058(2) 0.0371(16) 0.0191(14) 0.0013(12) -0.0153(14) 0.0160(16) 
C35 0.0265(14) 0.0182(13) 0.0147(13) 0.0009(10) 0.0058(11) 0.0066(12) 
C36 0.0404(17) 0.0178(14) 0.0259(14) -0.0014(12) 0.0043(13) 0.0101(13) 
C37 0.0235(14) 0.0340(16) 0.0250(14) 0.0019(12) 0.0042(12) 0.0117(13) 
C38 0.0442(18) 0.0292(15) 0.0219(14) -0.0038(12) 0.0077(13) 0.0152(14) 
C39 0.0196(12) 0.0136(12) 0.0129(11) -0.0032(10) 0.0002(10) 0.0011(10) 
C40 0.0251(13) 0.0185(13) 0.0121(12) -0.0018(10) -0.0018(11) -0.0010(11) 
C41 0.0254(14) 0.0208(13) 0.0155(12) -0.0016(10) 0.0033(11) 0.0000(11) 
C42 0.0281(15) 0.0176(12) 0.0172(13) -0.0029(10) -0.0004(11) 0.0026(11) 
C43 0.0186(13) 0.0217(13) 0.0323(15) 0.0020(12) 0.0011(12) -0.0010(11) 
Cl3 0.0295(10) 0.0526(10) 0.0571(9) 0.0094(7) 0.0009(7) -0.0053(7) 
Cl4 0.113(3) 0.055(3) 0.105(3) -0.001(3) 0.022(3) 0.011(3) 
C44 0.039(3) 0.041(3) 0.060(3) -0.002(3) 0.017(3) -0.013(3) 
Cl3' 0.073(3) 0.0550(16) 0.0450(15) 0.0073(12) -0.0166(15) 0.0101(15) 
Cl4' 0.049(2) 0.021(2) 0.033(2) 0.003(2) 0.0134(18) 0.002(2) 
C44' 0.067(5) 0.064(5) 0.094(5) -0.001(5) -0.004(5) 0.025(5) 
  
_geom_special_details 
; 
 All esds (except the esd in the dihedral angle between two l.s. planes) 
 are estimated using the full covariance matrix.  The cell esds are taken 
 into account individually in the estimation of esds in distances, angles 
 and torsion angles; correlations between esds in cell parameters are only 
 used when they are defined by crystal symmetry.  An approximate (isotropic) 
 treatment of cell esds is used for estimating esds involving l.s. planes. 
; 
  
loop_ 
 _geom_bond_atom_site_label_1 
 _geom_bond_atom_site_label_2 
 _geom_bond_distance 
 _geom_bond_site_symmetry_2 
 _geom_bond_publ_flag 
Ni1 C7 1.866(2) . ? 
Ni1 C28 1.873(2) . ? 
Ni1 O2 1.8875(14) . ? 
Ni1 O1 1.9145(15) . ? 
Cl1 C43 1.771(2) . ? 
Cl2 C43 1.761(2) . ? 
O1 C1 1.342(2) . ? 
O2 C22 1.334(2) . ? 
N1 C7 1.361(2) . ? 
N1 C8 1.381(3) . ? 
N1 C2 1.425(3) . ? 
N2 C7 1.369(3) . ? 
N2 C9 1.393(3) . ? 
N2 C18 1.507(3) . ? 
N3 C28 1.358(3) . ? 
N3 C29 1.393(3) . ? 
N3 C23 1.436(3) . ? 
N4 C28 1.368(3) . ? 
N4 C30 1.382(3) . ? 
N4 C39 1.510(3) . ? 
C1 C2 1.411(3) . ? 
C1 C6 1.416(3) . ? 
C2 C3 1.392(3) . ? 
C3 C4 1.383(3) . ? 
C3 H3 0.9500 . ? 
C4 C5 1.400(3) . ? 
C4 C10 1.532(3) . ? 
C5 C6 1.396(3) . ? 
C5 H5 0.9500 . ? 
C6 C14 1.535(3) . ? 
C8 C9 1.333(3) . ? 
C8 H8 0.9500 . ? 
C9 H9 0.9500 . ? 
C10 C13 1.521(3) . ? 
C10 C11 1.535(3) . ? 
C10 C12 1.535(3) . ? 
C11 H11A 0.9800 . ? 
C11 H11B 0.9800 . ? 
C11 H11C 0.9800 . ? 
C12 H12A 0.9800 . ? 
C12 H12B 0.9800 . ? 
C12 H12C 0.9800 . ? 
C13 H13A 0.9800 . ? 
C13 H13B 0.9800 . ? 
C13 H13C 0.9800 . ? 
C14 C17 1.529(3) . ? 
C14 C15 1.535(3) . ? 
C14 C16 1.537(3) . ? 
C15 H15A 0.9800 . ? 
C15 H15B 0.9800 . ? 
C15 H15C 0.9800 . ? 
C16 H16A 0.9800 . ? 
C16 H16B 0.9800 . ? 
C16 H16C 0.9800 . ? 
C17 H17A 0.9800 . ? 
C17 H17B 0.9800 . ? 
C17 H17C 0.9800 . ? 
C18 C20 1.526(3) . ? 
C18 C21 1.530(3) . ? 
C18 C19 1.532(3) . ? 
C19 H19A 0.9800 . ? 
C19 H19B 0.9800 . ? 
C19 H19C 0.9800 . ? 
C20 H20A 0.9800 . ? 
C20 H20B 0.9800 . ? 
C20 H20C 0.9800 . ? 
C21 H21A 0.9800 . ? 
C21 H21B 0.9800 . ? 
C21 H21C 0.9800 . ? 
C22 C23 1.412(3) . ? 
C22 C27 1.424(3) . ? 
C23 C24 1.386(3) . ? 
C24 C25 1.377(3) . ? 
C24 H24 0.9500 . ? 
C25 C26 1.406(3) . ? 
C25 C31 1.533(3) . ? 
C26 C27 1.385(3) . ? 
C26 H26 0.9500 . ? 
C27 C35 1.542(3) . ? 
C29 C30 1.343(3) . ? 
C29 H29 0.9500 . ? 
C30 H30 0.9500 . ? 
C31 C34 1.523(3) . ? 
C31 C32 1.527(3) . ? 
C31 C33 1.536(3) . ? 
C32 H32A 0.9800 . ? 
C32 H32B 0.9800 . ? 
C32 H32C 0.9800 . ? 
C33 H33A 0.9800 . ? 
C33 H33B 0.9800 . ? 
C33 H33C 0.9800 . ? 
C34 H34A 0.9800 . ? 
C34 H34B 0.9800 . ? 
C34 H34C 0.9800 . ? 
C35 C37 1.531(3) . ? 
C35 C38 1.535(3) . ? 
C35 C36 1.544(3) . ? 
C36 H36A 0.9800 . ? 
C36 H36B 0.9800 . ? 
C36 H36C 0.9800 . ? 
C37 H37A 0.9800 . ? 
C37 H37B 0.9800 . ? 
C37 H37C 0.9800 . ? 
C38 H38A 0.9800 . ? 
C38 H38B 0.9800 . ? 
C38 H38C 0.9800 . ? 
C39 C40 1.521(3) . ? 
C39 C41 1.534(3) . ? 
C39 C42 1.537(3) . ? 
C40 H40A 0.9800 . ? 
C40 H40B 0.9800 . ? 
C40 H40C 0.9800 . ? 
C41 H41A 0.9800 . ? 
C41 H41B 0.9800 . ? 
C41 H41C 0.9800 . ? 
C42 H42A 0.9800 . ? 
C42 H42B 0.9800 . ? 
C42 H42C 0.9800 . ? 
C43 H43A 0.9900 . ? 
C43 H43B 0.9900 . ? 
Cl3 C44 1.769(4) . ? 
Cl4 C44 1.762(5) . ? 
C44 H44A 0.9900 . ? 
C44 H44B 0.9900 . ? 
Cl3' C44' 1.743(7) . ? 
Cl4' C44' 1.780(8) . ? 
C44' H44C 0.9900 . ? 
C44' H44D 0.9900 . ? 
  
loop_ 
 _geom_angle_atom_site_label_1 
 _geom_angle_atom_site_label_2 
 _geom_angle_atom_site_label_3 
 _geom_angle 
 _geom_angle_site_symmetry_1 
 _geom_angle_site_symmetry_3 
 _geom_angle_publ_flag 
C7 Ni1 C28 99.61(9) . . ? 
C7 Ni1 O2 164.00(8) . . ? 
C28 Ni1 O2 87.88(8) . . ? 
C7 Ni1 O1 86.63(8) . . ? 
C28 Ni1 O1 164.23(8) . . ? 
O2 Ni1 O1 89.84(6) . . ? 
C1 O1 Ni1 112.33(13) . . ? 
C22 O2 Ni1 116.00(13) . . ? 
C7 N1 C8 110.95(19) . . ? 
C7 N1 C2 122.80(19) . . ? 
C8 N1 C2 125.86(18) . . ? 
C7 N2 C9 109.72(18) . . ? 
C7 N2 C18 126.93(19) . . ? 
C9 N2 C18 123.33(19) . . ? 
C28 N3 C29 110.60(17) . . ? 
C28 N3 C23 124.21(18) . . ? 
C29 N3 C23 124.94(17) . . ? 
C28 N4 C30 109.93(17) . . ? 
C28 N4 C39 127.59(17) . . ? 
C30 N4 C39 122.38(17) . . ? 
O1 C1 C2 120.7(2) . . ? 
O1 C1 C6 122.3(2) . . ? 
C2 C1 C6 117.03(19) . . ? 
C3 C2 C1 122.8(2) . . ? 
C3 C2 N1 119.7(2) . . ? 
C1 C2 N1 117.56(19) . . ? 
C4 C3 C2 120.5(2) . . ? 
C4 C3 H3 119.8 . . ? 
C2 C3 H3 119.8 . . ? 
C3 C4 C5 116.9(2) . . ? 
C3 C4 C10 119.9(2) . . ? 
C5 C4 C10 123.2(2) . . ? 
C6 C5 C4 124.2(2) . . ? 
C6 C5 H5 117.9 . . ? 
C4 C5 H5 117.9 . . ? 
C5 C6 C1 118.4(2) . . ? 
C5 C6 C14 121.3(2) . . ? 
C1 C6 C14 120.28(19) . . ? 
N1 C7 N2 104.61(19) . . ? 
N1 C7 Ni1 120.38(17) . . ? 
N2 C7 Ni1 134.54(16) . . ? 
C9 C8 N1 107.04(19) . . ? 
C9 C8 H8 126.5 . . ? 
N1 C8 H8 126.5 . . ? 
C8 C9 N2 107.7(2) . . ? 
C8 C9 H9 126.2 . . ? 
N2 C9 H9 126.2 . . ? 
C13 C10 C4 110.00(19) . . ? 
C13 C10 C11 108.4(2) . . ? 
C4 C10 C11 112.3(2) . . ? 
C13 C10 C12 110.0(2) . . ? 
C4 C10 C12 109.12(19) . . ? 
C11 C10 C12 107.0(2) . . ? 
C10 C11 H11A 109.5 . . ? 
C10 C11 H11B 109.5 . . ? 
H11A C11 H11B 109.5 . . ? 
C10 C11 H11C 109.5 . . ? 
H11A C11 H11C 109.5 . . ? 
H11B C11 H11C 109.5 . . ? 
C10 C12 H12A 109.5 . . ? 
C10 C12 H12B 109.5 . . ? 
H12A C12 H12B 109.5 . . ? 
C10 C12 H12C 109.5 . . ? 
H12A C12 H12C 109.5 . . ? 
H12B C12 H12C 109.5 . . ? 
C10 C13 H13A 109.5 . . ? 
C10 C13 H13B 109.5 . . ? 
H13A C13 H13B 109.5 . . ? 
C10 C13 H13C 109.5 . . ? 
H13A C13 H13C 109.5 . . ? 
H13B C13 H13C 109.5 . . ? 
C17 C14 C6 110.48(18) . . ? 
C17 C14 C15 109.67(18) . . ? 
C6 C14 C15 109.16(18) . . ? 
C17 C14 C16 107.66(18) . . ? 
C6 C14 C16 112.56(18) . . ? 
C15 C14 C16 107.21(18) . . ? 
C14 C15 H15A 109.5 . . ? 
C14 C15 H15B 109.5 . . ? 
H15A C15 H15B 109.5 . . ? 
C14 C15 H15C 109.5 . . ? 
H15A C15 H15C 109.5 . . ? 
H15B C15 H15C 109.5 . . ? 
C14 C16 H16A 109.5 . . ? 
C14 C16 H16B 109.5 . . ? 
H16A C16 H16B 109.5 . . ? 
C14 C16 H16C 109.5 . . ? 
H16A C16 H16C 109.5 . . ? 
H16B C16 H16C 109.5 . . ? 
C14 C17 H17A 109.5 . . ? 
C14 C17 H17B 109.5 . . ? 
H17A C17 H17B 109.5 . . ? 
C14 C17 H17C 109.5 . . ? 
H17A C17 H17C 109.5 . . ? 
H17B C17 H17C 109.5 . . ? 
N2 C18 C20 109.06(18) . . ? 
N2 C18 C21 108.89(18) . . ? 
C20 C18 C21 112.05(19) . . ? 
N2 C18 C19 108.86(18) . . ? 
C20 C18 C19 109.23(19) . . ? 
C21 C18 C19 108.70(19) . . ? 
C18 C19 H19A 109.5 . . ? 
C18 C19 H19B 109.5 . . ? 
H19A C19 H19B 109.5 . . ? 
C18 C19 H19C 109.5 . . ? 
H19A C19 H19C 109.5 . . ? 
H19B C19 H19C 109.5 . . ? 
C18 C20 H20A 109.5 . . ? 
C18 C20 H20B 109.5 . . ? 
H20A C20 H20B 109.5 . . ? 
C18 C20 H20C 109.5 . . ? 
H20A C20 H20C 109.5 . . ? 
H20B C20 H20C 109.5 . . ? 
C18 C21 H21A 109.5 . . ? 
C18 C21 H21B 109.5 . . ? 
H21A C21 H21B 109.5 . . ? 
C18 C21 H21C 109.5 . . ? 
H21A C21 H21C 109.5 . . ? 
H21B C21 H21C 109.5 . . ? 
O2 C22 C23 121.84(19) . . ? 
O2 C22 C27 121.53(19) . . ? 
C23 C22 C27 116.62(19) . . ? 
C24 C23 C22 122.98(19) . . ? 
C24 C23 N3 119.56(19) . . ? 
C22 C23 N3 117.40(18) . . ? 
C25 C24 C23 120.7(2) . . ? 
C25 C24 H24 119.6 . . ? 
C23 C24 H24 119.6 . . ? 
C24 C25 C26 116.79(19) . . ? 
C24 C25 C31 123.7(2) . . ? 
C26 C25 C31 119.50(19) . . ? 
C27 C26 C25 124.2(2) . . ? 
C27 C26 H26 117.9 . . ? 
C25 C26 H26 117.9 . . ? 
C26 C27 C22 118.6(2) . . ? 
C26 C27 C35 120.87(19) . . ? 
C22 C27 C35 120.53(18) . . ? 
N3 C28 N4 104.99(17) . . ? 
N3 C28 Ni1 120.64(16) . . ? 
N4 C28 Ni1 134.25(16) . . ? 
C30 C29 N3 106.45(19) . . ? 
C30 C29 H29 126.8 . . ? 
N3 C29 H29 126.8 . . ? 
C29 C30 N4 107.92(19) . . ? 
C29 C30 H30 126.0 . . ? 
N4 C30 H30 126.0 . . ? 
C34 C31 C32 109.2(2) . . ? 
C34 C31 C25 112.47(19) . . ? 
C32 C31 C25 109.1(2) . . ? 
C34 C31 C33 106.8(2) . . ? 
C32 C31 C33 108.7(2) . . ? 
C25 C31 C33 110.4(2) . . ? 
C31 C32 H32A 109.5 . . ? 
C31 C32 H32B 109.5 . . ? 
H32A C32 H32B 109.5 . . ? 
C31 C32 H32C 109.5 . . ? 
H32A C32 H32C 109.5 . . ? 
H32B C32 H32C 109.5 . . ? 
C31 C33 H33A 109.5 . . ? 
C31 C33 H33B 109.5 . . ? 
H33A C33 H33B 109.5 . . ? 
C31 C33 H33C 109.5 . . ? 
H33A C33 H33C 109.5 . . ? 
H33B C33 H33C 109.5 . . ? 
C31 C34 H34A 109.5 . . ? 
C31 C34 H34B 109.5 . . ? 
H34A C34 H34B 109.5 . . ? 
C31 C34 H34C 109.5 . . ? 
H34A C34 H34C 109.5 . . ? 
H34B C34 H34C 109.5 . . ? 
C37 C35 C38 106.9(2) . . ? 
C37 C35 C27 109.68(19) . . ? 
C38 C35 C27 112.85(19) . . ? 
C37 C35 C36 110.9(2) . . ? 
C38 C35 C36 106.93(19) . . ? 
C27 C35 C36 109.60(19) . . ? 
C35 C36 H36A 109.5 . . ? 
C35 C36 H36B 109.5 . . ? 
H36A C36 H36B 109.5 . . ? 
C35 C36 H36C 109.5 . . ? 
H36A C36 H36C 109.5 . . ? 
H36B C36 H36C 109.5 . . ? 
C35 C37 H37A 109.5 . . ? 
C35 C37 H37B 109.5 . . ? 
H37A C37 H37B 109.5 . . ? 
C35 C37 H37C 109.5 . . ? 
H37A C37 H37C 109.5 . . ? 
H37B C37 H37C 109.5 . . ? 
C35 C38 H38A 109.5 . . ? 
C35 C38 H38B 109.5 . . ? 
H38A C38 H38B 109.5 . . ? 
C35 C38 H38C 109.5 . . ? 
H38A C38 H38C 109.5 . . ? 
H38B C38 H38C 109.5 . . ? 
N4 C39 C40 109.69(17) . . ? 
N4 C39 C41 109.41(18) . . ? 
C40 C39 C41 112.34(18) . . ? 
N4 C39 C42 108.14(17) . . ? 
C40 C39 C42 107.89(19) . . ? 
C41 C39 C42 109.27(19) . . ? 
C39 C40 H40A 109.5 . . ? 
C39 C40 H40B 109.5 . . ? 
H40A C40 H40B 109.5 . . ? 
C39 C40 H40C 109.5 . . ? 
H40A C40 H40C 109.5 . . ? 
H40B C40 H40C 109.5 . . ? 
C39 C41 H41A 109.5 . . ? 
C39 C41 H41B 109.5 . . ? 
H41A C41 H41B 109.5 . . ? 
C39 C41 H41C 109.5 . . ? 
H41A C41 H41C 109.5 . . ? 
H41B C41 H41C 109.5 . . ? 
C39 C42 H42A 109.5 . . ? 
C39 C42 H42B 109.5 . . ? 
H42A C42 H42B 109.5 . . ? 
C39 C42 H42C 109.5 . . ? 
H42A C42 H42C 109.5 . . ? 
H42B C42 H42C 109.5 . . ? 
Cl2 C43 Cl1 112.09(13) . . ? 
Cl2 C43 H43A 109.2 . . ? 
Cl1 C43 H43A 109.2 . . ? 
Cl2 C43 H43B 109.2 . . ? 
Cl1 C43 H43B 109.2 . . ? 
H43A C43 H43B 107.9 . . ? 
Cl4 C44 Cl3 110.2(3) . . ? 
Cl4 C44 H44A 109.6 . . ? 
Cl3 C44 H44A 109.6 . . ? 
Cl4 C44 H44B 109.6 . . ? 
Cl3 C44 H44B 109.6 . . ? 
H44A C44 H44B 108.1 . . ? 
Cl3' C44' Cl4' 111.3(5) . . ? 
Cl3' C44' H44C 109.4 . . ? 
Cl4' C44' H44C 109.4 . . ? 
Cl3' C44' H44D 109.4 . . ? 
Cl4' C44' H44D 109.4 . . ? 
H44C C44' H44D 108.0 . . ? 
  
loop_ 
 _geom_torsion_atom_site_label_1 
 _geom_torsion_atom_site_label_2 
 _geom_torsion_atom_site_label_3 
 _geom_torsion_atom_site_label_4 
 _geom_torsion 
 _geom_torsion_site_symmetry_1 
 _geom_torsion_site_symmetry_2 
 _geom_torsion_site_symmetry_3 
 _geom_torsion_site_symmetry_4 
 _geom_torsion_publ_flag 
C7 Ni1 O1 C1 -64.16(15) . . . . ? 
C28 Ni1 O1 C1 49.8(4) . . . . ? 
O2 Ni1 O1 C1 131.45(15) . . . . ? 
C7 Ni1 O2 C22 59.3(3) . . . . ? 
C28 Ni1 O2 C22 -59.17(15) . . . . ? 
O1 Ni1 O2 C22 136.44(15) . . . . ? 
Ni1 O1 C1 C2 50.2(2) . . . . ? 
Ni1 O1 C1 C6 -131.92(18) . . . . ? 
O1 C1 C2 C3 -176.65(19) . . . . ? 
C6 C1 C2 C3 5.4(3) . . . . ? 
O1 C1 C2 N1 3.6(3) . . . . ? 
C6 C1 C2 N1 -174.37(18) . . . . ? 
C7 N1 C2 C3 148.8(2) . . . . ? 
C8 N1 C2 C3 -39.0(3) . . . . ? 
C7 N1 C2 C1 -31.5(3) . . . . ? 
C8 N1 C2 C1 140.8(2) . . . . ? 
C1 C2 C3 C4 -1.7(3) . . . . ? 
N1 C2 C3 C4 178.0(2) . . . . ? 
C2 C3 C4 C5 -2.1(3) . . . . ? 
C2 C3 C4 C10 176.3(2) . . . . ? 
C3 C4 C5 C6 2.1(3) . . . . ? 
C10 C4 C5 C6 -176.1(2) . . . . ? 
C4 C5 C6 C1 1.6(3) . . . . ? 
C4 C5 C6 C14 -178.7(2) . . . . ? 
O1 C1 C6 C5 176.92(19) . . . . ? 
C2 C1 C6 C5 -5.2(3) . . . . ? 
O1 C1 C6 C14 -2.8(3) . . . . ? 
C2 C1 C6 C14 175.13(19) . . . . ? 
C8 N1 C7 N2 -1.6(2) . . . . ? 
C2 N1 C7 N2 171.60(18) . . . . ? 
C8 N1 C7 Ni1 -174.92(15) . . . . ? 
C2 N1 C7 Ni1 -1.7(3) . . . . ? 
C9 N2 C7 N1 1.6(2) . . . . ? 
C18 N2 C7 N1 -176.95(18) . . . . ? 
C9 N2 C7 Ni1 173.44(17) . . . . ? 
C18 N2 C7 Ni1 -5.1(4) . . . . ? 
C28 Ni1 C7 N1 -124.49(17) . . . . ? 
O2 Ni1 C7 N1 118.5(3) . . . . ? 
O1 Ni1 C7 N1 40.92(17) . . . . ? 
C28 Ni1 C7 N2 64.7(2) . . . . ? 
O2 Ni1 C7 N2 -52.4(4) . . . . ? 
O1 Ni1 C7 N2 -129.9(2) . . . . ? 
C7 N1 C8 C9 1.1(3) . . . . ? 
C2 N1 C8 C9 -171.9(2) . . . . ? 
N1 C8 C9 N2 -0.1(3) . . . . ? 
C7 N2 C9 C8 -1.0(3) . . . . ? 
C18 N2 C9 C8 177.6(2) . . . . ? 
C3 C4 C10 C13 61.3(3) . . . . ? 
C5 C4 C10 C13 -120.5(2) . . . . ? 
C3 C4 C10 C11 -177.9(2) . . . . ? 
C5 C4 C10 C11 0.3(3) . . . . ? 
C3 C4 C10 C12 -59.5(3) . . . . ? 
C5 C4 C10 C12 118.7(2) . . . . ? 
C5 C6 C14 C17 -119.5(2) . . . . ? 
C1 C6 C14 C17 60.2(3) . . . . ? 
C5 C6 C14 C15 119.8(2) . . . . ? 
C1 C6 C14 C15 -60.5(3) . . . . ? 
C5 C6 C14 C16 0.9(3) . . . . ? 
C1 C6 C14 C16 -179.42(19) . . . . ? 
C7 N2 C18 C20 -81.7(3) . . . . ? 
C9 N2 C18 C20 100.0(2) . . . . ? 
C7 N2 C18 C21 40.9(3) . . . . ? 
C9 N2 C18 C21 -137.5(2) . . . . ? 
C7 N2 C18 C19 159.2(2) . . . . ? 
C9 N2 C18 C19 -19.1(3) . . . . ? 
Ni1 O2 C22 C23 45.8(2) . . . . ? 
Ni1 O2 C22 C27 -135.14(18) . . . . ? 
O2 C22 C23 C24 -179.6(2) . . . . ? 
C27 C22 C23 C24 1.3(3) . . . . ? 
O2 C22 C23 N3 3.2(3) . . . . ? 
C27 C22 C23 N3 -175.96(19) . . . . ? 
C28 N3 C23 C24 157.0(2) . . . . ? 
C29 N3 C23 C24 -29.2(3) . . . . ? 
C28 N3 C23 C22 -25.7(3) . . . . ? 
C29 N3 C23 C22 148.1(2) . . . . ? 
C22 C23 C24 C25 -1.1(3) . . . . ? 
N3 C23 C24 C25 176.1(2) . . . . ? 
C23 C24 C25 C26 0.8(3) . . . . ? 
C23 C24 C25 C31 180.0(2) . . . . ? 
C24 C25 C26 C27 -0.8(3) . . . . ? 
C31 C25 C26 C27 -180.0(2) . . . . ? 
C25 C26 C27 C22 1.0(3) . . . . ? 
C25 C26 C27 C35 -179.2(2) . . . . ? 
O2 C22 C27 C26 179.7(2) . . . . ? 
C23 C22 C27 C26 -1.2(3) . . . . ? 
O2 C22 C27 C35 -0.1(3) . . . . ? 
C23 C22 C27 C35 178.98(19) . . . . ? 
C29 N3 C28 N4 -3.2(2) . . . . ? 
C23 N3 C28 N4 171.41(19) . . . . ? 
C29 N3 C28 Ni1 -179.75(15) . . . . ? 
C23 N3 C28 Ni1 -5.2(3) . . . . ? 
C30 N4 C28 N3 3.3(2) . . . . ? 
C39 N4 C28 N3 -173.15(19) . . . . ? 
C30 N4 C28 Ni1 179.20(18) . . . . ? 
C39 N4 C28 Ni1 2.8(3) . . . . ? 
C7 Ni1 C28 N3 -126.47(18) . . . . ? 
O2 Ni1 C28 N3 39.31(17) . . . . ? 
O1 Ni1 C28 N3 121.2(3) . . . . ? 
C7 Ni1 C28 N4 58.1(2) . . . . ? 
O2 Ni1 C28 N4 -136.1(2) . . . . ? 
O1 Ni1 C28 N4 -54.2(4) . . . . ? 
C28 N3 C29 C30 1.9(3) . . . . ? 
C23 N3 C29 C30 -172.7(2) . . . . ? 
N3 C29 C30 N4 0.2(2) . . . . ? 
C28 N4 C30 C29 -2.3(3) . . . . ? 
C39 N4 C30 C29 174.41(19) . . . . ? 
C24 C25 C31 C34 12.3(3) . . . . ? 
C26 C25 C31 C34 -168.5(2) . . . . ? 
C24 C25 C31 C32 -109.0(3) . . . . ? 
C26 C25 C31 C32 70.1(3) . . . . ? 
C24 C25 C31 C33 131.6(2) . . . . ? 
C26 C25 C31 C33 -49.3(3) . . . . ? 
C26 C27 C35 C37 117.5(2) . . . . ? 
C22 C27 C35 C37 -62.6(3) . . . . ? 
C26 C27 C35 C38 -1.5(3) . . . . ? 
C22 C27 C35 C38 178.3(2) . . . . ? 
C26 C27 C35 C36 -120.5(2) . . . . ? 
C22 C27 C35 C36 59.3(3) . . . . ? 
C28 N4 C39 C40 37.4(3) . . . . ? 
C30 N4 C39 C40 -138.7(2) . . . . ? 
C28 N4 C39 C41 -86.3(3) . . . . ? 
C30 N4 C39 C41 97.7(2) . . . . ? 
C28 N4 C39 C42 154.8(2) . . . . ? 
C30 N4 C39 C42 -21.3(3) . . . . ? 
  
_diffrn_measured_fraction_theta_max    0.995 
_diffrn_reflns_theta_full              27.49 
_diffrn_measured_fraction_theta_full   0.995 
_refine_diff_density_max    0.283 
_refine_diff_density_min   -0.363 
_refine_diff_density_rms    0.055 


#===END

  
data_r090811b 
  
_audit_creation_method            SHELXL-97 
_chemical_name_systematic 
; 
 ? 
; 
_chemical_name_common             ? 
_chemical_melting_point           ? 
_chemical_formula_moiety          ? 
_chemical_formula_sum 
 'C46 H54 N4 Ni O2' 
_chemical_formula_weight          753.64 
  
loop_ 
 _atom_type_symbol 
 _atom_type_description 
 _atom_type_scat_dispersion_real 
 _atom_type_scat_dispersion_imag 
 _atom_type_scat_source 
 'C'  'C'   0.0033   0.0016 
 'International Tables Vol C Tables 4.2.6.8 and 6.1.1.4' 
 'H'  'H'   0.0000   0.0000 
 'International Tables Vol C Tables 4.2.6.8 and 6.1.1.4' 
 'N'  'N'   0.0061   0.0033 
 'International Tables Vol C Tables 4.2.6.8 and 6.1.1.4' 
 'O'  'O'   0.0106   0.0060 
 'International Tables Vol C Tables 4.2.6.8 and 6.1.1.4' 
 'Ni'  'Ni'   0.3393   1.1124 
 'International Tables Vol C Tables 4.2.6.8 and 6.1.1.4' 
  
_symmetry_cell_setting            Monoclinic 
_symmetry_space_group_name_H-M    C2/c 
  
loop_ 
 _symmetry_equiv_pos_as_xyz 
 'x, y, z' 
 '-x, y, -z+1/2' 
 'x+1/2, y+1/2, z' 
 '-x+1/2, y+1/2, -z+1/2' 
 '-x, -y, -z' 
 'x, -y, z-1/2' 
 '-x+1/2, -y+1/2, -z' 
 'x+1/2, -y+1/2, z-1/2' 
  
_cell_length_a                    19.108(4) 
_cell_length_b                    17.873(4) 
_cell_length_c                    12.576(3) 
_cell_angle_alpha                 90.00 
_cell_angle_beta                  108.40(3) 
_cell_angle_gamma                 90.00 
_cell_volume                      4075.2(14) 
_cell_formula_units_Z             4 
_cell_measurement_temperature     123(2) 
_cell_measurement_reflns_used     5669 
_cell_measurement_theta_min       2.065 
_cell_measurement_theta_max       27.857 
  
_exptl_crystal_description        ? 
_exptl_crystal_colour             ? 
_exptl_crystal_size_max           0.24 
_exptl_crystal_size_mid           0.20 
_exptl_crystal_size_min           0.10 
_exptl_crystal_density_meas       ? 
_exptl_crystal_density_diffrn     1.228 
_exptl_crystal_density_method     'not measured' 
_exptl_crystal_F_000              1608 
_exptl_absorpt_coefficient_mu     0.518 
_exptl_absorpt_correction_type    MULTI-SCAN 
_exptl_absorpt_correction_T_min   0.8858 
_exptl_absorpt_correction_T_max   0.9500 
_exptl_absorpt_process_details    crystalclear 
  
_exptl_special_details 
; 
 ? 
; 
  
_diffrn_ambient_temperature       123(2) 
_diffrn_radiation_wavelength      0.71073 
_diffrn_radiation_type            MoK\a 
_diffrn_radiation_source          'rotating anode' 
_diffrn_radiation_monochromator   multilayer
_diffrn_measurement_device_type   'rigaku saturn CCD area detector' 
_diffrn_measurement_method        '\w and \f scans' 
_diffrn_detector_area_resol_mean  7.31 
_diffrn_standards_number          0 
_diffrn_standards_interval_count  0 
_diffrn_standards_interval_time   0 
_diffrn_standards_decay_%         0 
_diffrn_reflns_number             13593 
_diffrn_reflns_av_R_equivalents   0.0450 
_diffrn_reflns_av_sigmaI/netI     0.0436 
_diffrn_reflns_limit_h_min        -22 
_diffrn_reflns_limit_h_max        22 
_diffrn_reflns_limit_k_min        -21 
_diffrn_reflns_limit_k_max        21 
_diffrn_reflns_limit_l_min        -14 
_diffrn_reflns_limit_l_max        11 
_diffrn_reflns_theta_min          2.06 
_diffrn_reflns_theta_max          25.02 
_reflns_number_total              3595 
_reflns_number_gt                 3023 
_reflns_threshold_expression      >2sigma(I) 
  
_computing_data_collection        'crystalclear(Rigaku/MSC Inc., 2005)' 
_computing_cell_refinement        crystalclear 
_computing_data_reduction         crystalclear 
_computing_structure_solution     'SHELXS-97 (Sheldrick, 1990)' 
_computing_structure_refinement   'SHELXL-97 (Sheldrick, 1997)' 
_computing_molecular_graphics     'Bruker SHELXTL' 
_computing_publication_material   'Bruker SHELXTL' 
  
_refine_special_details 
; 
 Refinement of F^2^ against ALL reflections.  The weighted R-factor wR and 
 goodness of fit S are based on F^2^, conventional R-factors R are based 
 on F, with F set to zero for negative F^2^. The threshold expression of 
 F^2^ > 2sigma(F^2^) is used only for calculating R-factors(gt) etc. and is 
 not relevant to the choice of reflections for refinement.  R-factors based 
 on F^2^ are statistically about twice as large as those based on F, and R- 
 factors based on ALL data will be even larger. 
; 
  
_refine_ls_structure_factor_coef  Fsqd 
_refine_ls_matrix_type            full 
_refine_ls_weighting_scheme       calc 
_refine_ls_weighting_details 
 'calc w=1/[\s^2^(Fo^2^)+(0.0711P)^2^+1.4530P] where P=(Fo^2^+2Fc^2^)/3' 
_atom_sites_solution_primary      direct 
_atom_sites_solution_secondary    difmap 
_atom_sites_solution_hydrogens    geom 
_refine_ls_hydrogen_treatment     constr 
_refine_ls_extinction_method      none 
_refine_ls_extinction_coef        ? 
_refine_ls_number_reflns          3595 
_refine_ls_number_parameters      246 
_refine_ls_number_restraints      0 
_refine_ls_R_factor_all           0.0628 
_refine_ls_R_factor_gt            0.0512 
_refine_ls_wR_factor_ref          0.1308 
_refine_ls_wR_factor_gt           0.1236 
_refine_ls_goodness_of_fit_ref    1.072 
_refine_ls_restrained_S_all       1.072 
_refine_ls_shift/su_max           0.001 
_refine_ls_shift/su_mean          0.000 
  
loop_ 
 _atom_site_label 
 _atom_site_type_symbol 
 _atom_site_fract_x 
 _atom_site_fract_y 
 _atom_site_fract_z 
 _atom_site_U_iso_or_equiv 
 _atom_site_adp_type 
 _atom_site_occupancy 
 _atom_site_symmetry_multiplicity 
 _atom_site_calc_flag 
 _atom_site_refinement_flags 
 _atom_site_disorder_assembly 
 _atom_site_disorder_group 
Ni1 Ni 0.5000 0.54565(2) 0.7500 0.03466(18) Uani 1 2 d S . . 
O1 O 0.55475(9) 0.61975(9) 0.70486(16) 0.0405(5) Uani 1 1 d . . . 
N1 N 0.60820(12) 0.48033(12) 0.66832(19) 0.0387(5) Uani 1 1 d . . . 
N2 N 0.50923(12) 0.41292(11) 0.61906(18) 0.0392(5) Uani 1 1 d . . . 
C1 C 0.62734(14) 0.61023(14) 0.7279(2) 0.0362(6) Uani 1 1 d . . . 
C2 C 0.67773(14) 0.67011(14) 0.7667(2) 0.0389(6) Uani 1 1 d . . . 
C3 C 0.75304(15) 0.65550(15) 0.7925(2) 0.0458(7) Uani 1 1 d . . . 
H3 H 0.7862 0.6960 0.8187 0.055 Uiso 1 1 calc R . . 
C4 C 0.78295(15) 0.58616(16) 0.7826(3) 0.0467(7) Uani 1 1 d . . . 
C5 C 0.73316(15) 0.52836(16) 0.7422(3) 0.0453(7) Uani 1 1 d . . . 
H5 H 0.7509 0.4799 0.7333 0.054 Uiso 1 1 calc R . . 
C6 C 0.65802(15) 0.54044(14) 0.7147(2) 0.0388(6) Uani 1 1 d . . . 
C7 C 0.64942(15) 0.74836(14) 0.7809(2) 0.0433(7) Uani 1 1 d . . . 
C8 C 0.60507(17) 0.74589(17) 0.8644(3) 0.0547(8) Uani 1 1 d . . . 
H8A H 0.5649 0.7095 0.8385 0.082 Uiso 1 1 calc R . . 
H8B H 0.5845 0.7955 0.8692 0.082 Uiso 1 1 calc R . . 
H8C H 0.6377 0.7311 0.9385 0.082 Uiso 1 1 calc R . . 
C9 C 0.59911(18) 0.77742(17) 0.6668(3) 0.0567(8) Uani 1 1 d . . . 
H9A H 0.6278 0.7822 0.6149 0.085 Uiso 1 1 calc R . . 
H9B H 0.5791 0.8264 0.6771 0.085 Uiso 1 1 calc R . . 
H9C H 0.5585 0.7421 0.6361 0.085 Uiso 1 1 calc R . . 
C10 C 0.71137(18) 0.80533(16) 0.8258(3) 0.0601(9) Uani 1 1 d . . . 
H10A H 0.7430 0.7896 0.9001 0.090 Uiso 1 1 calc R . . 
H10B H 0.6901 0.8545 0.8315 0.090 Uiso 1 1 calc R . . 
H10C H 0.7408 0.8085 0.7747 0.090 Uiso 1 1 calc R . . 
C11 C 0.86608(16) 0.5708(2) 0.8161(3) 0.0627(9) Uani 1 1 d . . . 
C12 C 0.8841(2) 0.5415(3) 0.7139(5) 0.137(2) Uani 1 1 d . . . 
H12A H 0.8811 0.5826 0.6610 0.206 Uiso 1 1 calc R . . 
H12B H 0.8487 0.5024 0.6774 0.206 Uiso 1 1 calc R . . 
H12C H 0.9341 0.5207 0.7375 0.206 Uiso 1 1 calc R . . 
C13 C 0.8866(3) 0.5106(3) 0.9032(6) 0.162(3) Uani 1 1 d . . . 
H13A H 0.9351 0.4904 0.9079 0.243 Uiso 1 1 calc R . . 
H13B H 0.8497 0.4706 0.8828 0.243 Uiso 1 1 calc R . . 
H13C H 0.8883 0.5316 0.9760 0.243 Uiso 1 1 calc R . . 
C14 C 0.9128(2) 0.6392(2) 0.8574(4) 0.0985(15) Uani 1 1 d . . . 
H14A H 0.9039 0.6581 0.9252 0.148 Uiso 1 1 calc R . . 
H14B H 0.8998 0.6779 0.7993 0.148 Uiso 1 1 calc R . . 
H14C H 0.9650 0.6261 0.8745 0.148 Uiso 1 1 calc R . . 
C15 C 0.62082(16) 0.42069(15) 0.6057(2) 0.0480(7) Uani 1 1 d . . . 
H15 H 0.6647 0.4113 0.5878 0.058 Uiso 1 1 calc R . . 
C16 C 0.55992(17) 0.37939(15) 0.5756(2) 0.0492(7) Uani 1 1 d . . . 
H16 H 0.5524 0.3349 0.5321 0.059 Uiso 1 1 calc R . . 
C17 C 0.53974(14) 0.47573(13) 0.6786(2) 0.0343(6) Uani 1 1 d . . . 
C18 C 0.43585(16) 0.38679(15) 0.6020(2) 0.0437(7) Uani 1 1 d . . . 
C19 C 0.4244(2) 0.31139(19) 0.6157(3) 0.0711(10) Uani 1 1 d . . . 
H19 H 0.4643 0.2769 0.6353 0.085 Uiso 1 1 calc R . . 
C20 C 0.3522(3) 0.2880(3) 0.5997(4) 0.1003(16) Uani 1 1 d . . . 
H20 H 0.3429 0.2367 0.6095 0.120 Uiso 1 1 calc R . . 
C21 C 0.2947(3) 0.3370(4) 0.5703(4) 0.1047(18) Uani 1 1 d . . . 
H21 H 0.2459 0.3197 0.5590 0.126 Uiso 1 1 calc R . . 
C22 C 0.3073(2) 0.4109(3) 0.5571(3) 0.0830(12) Uani 1 1 d . . . 
H22 H 0.2673 0.4451 0.5372 0.100 Uiso 1 1 calc R . . 
C23 C 0.37826(17) 0.43627(19) 0.5724(3) 0.0555(8) Uani 1 1 d . . . 
H23 H 0.3869 0.4877 0.5625 0.067 Uiso 1 1 calc R . . 
  
loop_ 
 _atom_site_aniso_label 
 _atom_site_aniso_U_11 
 _atom_site_aniso_U_22 
 _atom_site_aniso_U_33 
 _atom_site_aniso_U_23 
 _atom_site_aniso_U_13 
 _atom_site_aniso_U_12 
Ni1 0.0276(3) 0.0316(3) 0.0457(3) 0.000 0.0129(2) 0.000 
O1 0.0285(10) 0.0341(9) 0.0596(12) 0.0048(8) 0.0148(9) 0.0016(8) 
N1 0.0327(12) 0.0371(12) 0.0473(13) -0.0042(10) 0.0140(11) -0.0002(10) 
N2 0.0374(13) 0.0376(12) 0.0427(13) -0.0039(10) 0.0126(11) -0.0037(10) 
C1 0.0291(14) 0.0385(14) 0.0425(15) 0.0025(11) 0.0132(13) 0.0000(11) 
C2 0.0333(15) 0.0392(14) 0.0461(16) -0.0009(12) 0.0155(13) -0.0056(11) 
C3 0.0323(15) 0.0487(16) 0.0559(18) -0.0047(13) 0.0134(14) -0.0079(13) 
C4 0.0298(15) 0.0538(17) 0.0580(18) -0.0030(14) 0.0161(15) -0.0009(13) 
C5 0.0323(15) 0.0463(15) 0.0589(18) -0.0038(13) 0.0167(15) 0.0049(12) 
C6 0.0298(14) 0.0411(14) 0.0474(16) -0.0029(11) 0.0147(13) -0.0039(11) 
C7 0.0362(15) 0.0401(14) 0.0549(17) -0.0010(12) 0.0165(14) -0.0046(12) 
C8 0.0504(19) 0.0563(18) 0.063(2) -0.0089(15) 0.0258(17) -0.0042(15) 
C9 0.055(2) 0.0493(17) 0.064(2) 0.0115(15) 0.0171(17) -0.0040(15) 
C10 0.053(2) 0.0439(17) 0.085(2) -0.0081(15) 0.0236(19) -0.0126(14) 
C11 0.0288(17) 0.069(2) 0.089(3) -0.0055(18) 0.0163(18) -0.0001(15) 
C12 0.048(3) 0.193(6) 0.185(6) -0.091(4) 0.056(4) -0.014(3) 
C13 0.044(3) 0.170(5) 0.237(8) 0.103(5) -0.005(4) 0.013(3) 
C14 0.035(2) 0.102(3) 0.150(4) -0.032(3) 0.017(2) -0.008(2) 
C15 0.0438(17) 0.0473(16) 0.0582(18) -0.0111(13) 0.0236(16) 0.0050(14) 
C16 0.0525(19) 0.0424(16) 0.0543(18) -0.0118(13) 0.0192(16) 0.0009(14) 
C17 0.0301(14) 0.0338(13) 0.0380(14) 0.0025(11) 0.0092(12) -0.0025(11) 
C18 0.0441(17) 0.0489(16) 0.0359(14) -0.0056(12) 0.0097(14) -0.0174(13) 
C19 0.086(3) 0.056(2) 0.061(2) -0.0042(16) 0.010(2) -0.0290(19) 
C20 0.116(4) 0.098(3) 0.079(3) -0.016(2) 0.019(3) -0.077(3) 
C21 0.075(3) 0.172(5) 0.071(3) -0.037(3) 0.028(3) -0.073(4) 
C22 0.041(2) 0.137(4) 0.068(2) -0.024(2) 0.0114(19) -0.017(2) 
C23 0.0428(19) 0.072(2) 0.0477(18) -0.0049(15) 0.0083(16) -0.0088(16) 
  
_geom_special_details 
; 
 All esds (except the esd in the dihedral angle between two l.s. planes) 
 are estimated using the full covariance matrix.  The cell esds are taken 
 into account individually in the estimation of esds in distances, angles 
 and torsion angles; correlations between esds in cell parameters are only 
 used when they are defined by crystal symmetry.  An approximate (isotropic) 
 treatment of cell esds is used for estimating esds involving l.s. planes. 
; 
  
loop_ 
 _geom_bond_atom_site_label_1 
 _geom_bond_atom_site_label_2 
 _geom_bond_distance 
 _geom_bond_site_symmetry_2 
 _geom_bond_publ_flag 
Ni1 C17 1.838(2) . ? 
Ni1 C17 1.838(2) 2_656 ? 
Ni1 O1 1.8830(16) 2_656 ? 
Ni1 O1 1.8831(16) . ? 
O1 C1 1.335(3) . ? 
N1 C17 1.357(3) . ? 
N1 C15 1.391(3) . ? 
N1 C6 1.432(3) . ? 
N2 C17 1.373(3) . ? 
N2 C16 1.390(3) . ? 
N2 C18 1.428(3) . ? 
C1 C6 1.410(3) . ? 
C1 C2 1.419(4) . ? 
C2 C3 1.396(4) . ? 
C2 C7 1.530(4) . ? 
C3 C4 1.387(4) . ? 
C3 H3 0.9500 . ? 
C4 C5 1.388(4) . ? 
C4 C11 1.534(4) . ? 
C5 C6 1.384(4) . ? 
C5 H5 0.9500 . ? 
C7 C10 1.528(4) . ? 
C7 C9 1.543(4) . ? 
C7 C8 1.545(4) . ? 
C8 H8A 0.9800 . ? 
C8 H8B 0.9800 . ? 
C8 H8C 0.9800 . ? 
C9 H9A 0.9800 . ? 
C9 H9B 0.9800 . ? 
C9 H9C 0.9800 . ? 
C10 H10A 0.9800 . ? 
C10 H10B 0.9800 . ? 
C10 H10C 0.9800 . ? 
C11 C13 1.497(6) . ? 
C11 C14 1.505(5) . ? 
C11 C12 1.525(6) . ? 
C12 H12A 0.9800 . ? 
C12 H12B 0.9800 . ? 
C12 H12C 0.9800 . ? 
C13 H13A 0.9800 . ? 
C13 H13B 0.9800 . ? 
C13 H13C 0.9800 . ? 
C14 H14A 0.9800 . ? 
C14 H14B 0.9800 . ? 
C14 H14C 0.9800 . ? 
C15 C16 1.328(4) . ? 
C15 H15 0.9500 . ? 
C16 H16 0.9500 . ? 
C18 C23 1.369(4) . ? 
C18 C19 1.385(4) . ? 
C19 C20 1.395(6) . ? 
C19 H19 0.9500 . ? 
C20 C21 1.362(7) . ? 
C20 H20 0.9500 . ? 
C21 C22 1.361(6) . ? 
C21 H21 0.9500 . ? 
C22 C23 1.384(5) . ? 
C22 H22 0.9500 . ? 
C23 H23 0.9500 . ? 
  
loop_ 
 _geom_angle_atom_site_label_1 
 _geom_angle_atom_site_label_2 
 _geom_angle_atom_site_label_3 
 _geom_angle 
 _geom_angle_site_symmetry_1 
 _geom_angle_site_symmetry_3 
 _geom_angle_publ_flag 
C17 Ni1 C17 94.30(15) . 2_656 ? 
C17 Ni1 O1 168.65(10) . 2_656 ? 
C17 Ni1 O1 88.64(9) 2_656 2_656 ? 
C17 Ni1 O1 88.64(9) . . ? 
C17 Ni1 O1 168.65(10) 2_656 . ? 
O1 Ni1 O1 90.61(10) 2_656 . ? 
C1 O1 Ni1 118.86(15) . . ? 
C17 N1 C15 110.6(2) . . ? 
C17 N1 C6 122.9(2) . . ? 
C15 N1 C6 126.4(2) . . ? 
C17 N2 C16 109.8(2) . . ? 
C17 N2 C18 125.3(2) . . ? 
C16 N2 C18 125.0(2) . . ? 
O1 C1 C6 121.9(2) . . ? 
O1 C1 C2 121.6(2) . . ? 
C6 C1 C2 116.4(2) . . ? 
C3 C2 C1 118.5(2) . . ? 
C3 C2 C7 121.4(2) . . ? 
C1 C2 C7 120.2(2) . . ? 
C4 C3 C2 124.8(3) . . ? 
C4 C3 H3 117.6 . . ? 
C2 C3 H3 117.6 . . ? 
C3 C4 C5 116.3(3) . . ? 
C3 C4 C11 123.7(3) . . ? 
C5 C4 C11 119.9(3) . . ? 
C6 C5 C4 120.8(3) . . ? 
C6 C5 H5 119.6 . . ? 
C4 C5 H5 119.6 . . ? 
C5 C6 C1 123.1(2) . . ? 
C5 C6 N1 119.3(2) . . ? 
C1 C6 N1 117.7(2) . . ? 
C10 C7 C2 113.0(2) . . ? 
C10 C7 C9 107.6(2) . . ? 
C2 C7 C9 109.8(2) . . ? 
C10 C7 C8 107.2(2) . . ? 
C2 C7 C8 110.1(2) . . ? 
C9 C7 C8 109.1(2) . . ? 
C7 C8 H8A 109.5 . . ? 
C7 C8 H8B 109.5 . . ? 
H8A C8 H8B 109.5 . . ? 
C7 C8 H8C 109.5 . . ? 
H8A C8 H8C 109.5 . . ? 
H8B C8 H8C 109.5 . . ? 
C7 C9 H9A 109.5 . . ? 
C7 C9 H9B 109.5 . . ? 
H9A C9 H9B 109.5 . . ? 
C7 C9 H9C 109.5 . . ? 
H9A C9 H9C 109.5 . . ? 
H9B C9 H9C 109.5 . . ? 
C7 C10 H10A 109.5 . . ? 
C7 C10 H10B 109.5 . . ? 
H10A C10 H10B 109.5 . . ? 
C7 C10 H10C 109.5 . . ? 
H10A C10 H10C 109.5 . . ? 
H10B C10 H10C 109.5 . . ? 
C13 C11 C14 110.0(4) . . ? 
C13 C11 C12 107.1(4) . . ? 
C14 C11 C12 107.6(3) . . ? 
C13 C11 C4 109.8(3) . . ? 
C14 C11 C4 113.5(3) . . ? 
C12 C11 C4 108.7(3) . . ? 
C11 C12 H12A 109.5 . . ? 
C11 C12 H12B 109.5 . . ? 
H12A C12 H12B 109.5 . . ? 
C11 C12 H12C 109.5 . . ? 
H12A C12 H12C 109.5 . . ? 
H12B C12 H12C 109.5 . . ? 
C11 C13 H13A 109.5 . . ? 
C11 C13 H13B 109.5 . . ? 
H13A C13 H13B 109.5 . . ? 
C11 C13 H13C 109.5 . . ? 
H13A C13 H13C 109.5 . . ? 
H13B C13 H13C 109.5 . . ? 
C11 C14 H14A 109.5 . . ? 
C11 C14 H14B 109.5 . . ? 
H14A C14 H14B 109.5 . . ? 
C11 C14 H14C 109.5 . . ? 
H14A C14 H14C 109.5 . . ? 
H14B C14 H14C 109.5 . . ? 
C16 C15 N1 107.1(2) . . ? 
C16 C15 H15 126.4 . . ? 
N1 C15 H15 126.4 . . ? 
C15 C16 N2 107.8(2) . . ? 
C15 C16 H16 126.1 . . ? 
N2 C16 H16 126.1 . . ? 
N1 C17 N2 104.7(2) . . ? 
N1 C17 Ni1 124.39(19) . . ? 
N2 C17 Ni1 130.74(18) . . ? 
C23 C18 C19 121.2(3) . . ? 
C23 C18 N2 119.8(2) . . ? 
C19 C18 N2 119.0(3) . . ? 
C18 C19 C20 117.5(4) . . ? 
C18 C19 H19 121.3 . . ? 
C20 C19 H19 121.3 . . ? 
C21 C20 C19 121.5(4) . . ? 
C21 C20 H20 119.3 . . ? 
C19 C20 H20 119.3 . . ? 
C22 C21 C20 119.9(4) . . ? 
C22 C21 H21 120.0 . . ? 
C20 C21 H21 120.0 . . ? 
C21 C22 C23 120.3(4) . . ? 
C21 C22 H22 119.9 . . ? 
C23 C22 H22 119.9 . . ? 
C18 C23 C22 119.6(4) . . ? 
C18 C23 H23 120.2 . . ? 
C22 C23 H23 120.2 . . ? 
  
loop_ 
 _geom_torsion_atom_site_label_1 
 _geom_torsion_atom_site_label_2 
 _geom_torsion_atom_site_label_3 
 _geom_torsion_atom_site_label_4 
 _geom_torsion 
 _geom_torsion_site_symmetry_1 
 _geom_torsion_site_symmetry_2 
 _geom_torsion_site_symmetry_3 
 _geom_torsion_site_symmetry_4 
 _geom_torsion_publ_flag 
C17 Ni1 O1 C1 -52.7(2) . . . . ? 
C17 Ni1 O1 C1 52.5(5) 2_656 . . . ? 
O1 Ni1 O1 C1 138.6(2) 2_656 . . . ? 
Ni1 O1 C1 C6 42.2(3) . . . . ? 
Ni1 O1 C1 C2 -138.1(2) . . . . ? 
O1 C1 C2 C3 178.0(2) . . . . ? 
C6 C1 C2 C3 -2.2(4) . . . . ? 
O1 C1 C2 C7 -1.2(4) . . . . ? 
C6 C1 C2 C7 178.5(2) . . . . ? 
C1 C2 C3 C4 0.3(4) . . . . ? 
C7 C2 C3 C4 179.6(3) . . . . ? 
C2 C3 C4 C5 1.1(4) . . . . ? 
C2 C3 C4 C11 -177.4(3) . . . . ? 
C3 C4 C5 C6 -0.5(4) . . . . ? 
C11 C4 C5 C6 178.0(3) . . . . ? 
C4 C5 C6 C1 -1.5(4) . . . . ? 
C4 C5 C6 N1 177.1(3) . . . . ? 
O1 C1 C6 C5 -177.4(3) . . . . ? 
C2 C1 C6 C5 2.9(4) . . . . ? 
O1 C1 C6 N1 4.0(4) . . . . ? 
C2 C1 C6 N1 -175.7(2) . . . . ? 
C17 N1 C6 C5 153.8(3) . . . . ? 
C15 N1 C6 C5 -27.9(4) . . . . ? 
C17 N1 C6 C1 -27.6(4) . . . . ? 
C15 N1 C6 C1 150.7(3) . . . . ? 
C3 C2 C7 C10 -0.5(4) . . . . ? 
C1 C2 C7 C10 178.7(3) . . . . ? 
C3 C2 C7 C9 119.6(3) . . . . ? 
C1 C2 C7 C9 -61.2(3) . . . . ? 
C3 C2 C7 C8 -120.3(3) . . . . ? 
C1 C2 C7 C8 58.9(3) . . . . ? 
C3 C4 C11 C13 121.5(4) . . . . ? 
C5 C4 C11 C13 -57.0(5) . . . . ? 
C3 C4 C11 C14 -2.0(5) . . . . ? 
C5 C4 C11 C14 179.5(3) . . . . ? 
C3 C4 C11 C12 -121.7(4) . . . . ? 
C5 C4 C11 C12 59.8(4) . . . . ? 
C17 N1 C15 C16 0.8(3) . . . . ? 
C6 N1 C15 C16 -177.7(3) . . . . ? 
N1 C15 C16 N2 0.0(3) . . . . ? 
C17 N2 C16 C15 -0.8(3) . . . . ? 
C18 N2 C16 C15 177.8(3) . . . . ? 
C15 N1 C17 N2 -1.2(3) . . . . ? 
C6 N1 C17 N2 177.3(2) . . . . ? 
C15 N1 C17 Ni1 -177.32(19) . . . . ? 
C6 N1 C17 Ni1 1.2(4) . . . . ? 
C16 N2 C17 N1 1.2(3) . . . . ? 
C18 N2 C17 N1 -177.4(2) . . . . ? 
C16 N2 C17 Ni1 177.0(2) . . . . ? 
C18 N2 C17 Ni1 -1.6(4) . . . . ? 
C17 Ni1 C17 N1 -137.3(3) 2_656 . . . ? 
O1 Ni1 C17 N1 118.0(4) 2_656 . . . ? 
O1 Ni1 C17 N1 31.7(2) . . . . ? 
C17 Ni1 C17 N2 47.7(2) 2_656 . . . ? 
O1 Ni1 C17 N2 -57.0(5) 2_656 . . . ? 
O1 Ni1 C17 N2 -143.3(2) . . . . ? 
C17 N2 C18 C23 45.1(4) . . . . ? 
C16 N2 C18 C23 -133.3(3) . . . . ? 
C17 N2 C18 C19 -134.9(3) . . . . ? 
C16 N2 C18 C19 46.6(4) . . . . ? 
C23 C18 C19 C20 -0.8(5) . . . . ? 
N2 C18 C19 C20 179.2(3) . . . . ? 
C18 C19 C20 C21 0.8(6) . . . . ? 
C19 C20 C21 C22 -0.7(7) . . . . ? 
C20 C21 C22 C23 0.6(6) . . . . ? 
C19 C18 C23 C22 0.7(5) . . . . ? 
N2 C18 C23 C22 -179.3(3) . . . . ? 
C21 C22 C23 C18 -0.6(5) . . . . ? 
  
_diffrn_measured_fraction_theta_max    0.999 
_diffrn_reflns_theta_full              25.02 
_diffrn_measured_fraction_theta_full   0.999 
_refine_diff_density_max    0.356 
_refine_diff_density_min   -0.324 
_refine_diff_density_rms    0.053 


#===END

  
data_r060510c 
  
_audit_creation_method            SHELXL-97 
_chemical_name_systematic 
; 
 ? 
; 
_chemical_name_common             ? 
_chemical_melting_point           ? 
_chemical_formula_moiety          ? 
_chemical_formula_sum 
 'C55 H72 Cl6 N4 Ni O2' 
_chemical_formula_weight          1092.58 
  
loop_ 
 _atom_type_symbol 
 _atom_type_description 
 _atom_type_scat_dispersion_real 
 _atom_type_scat_dispersion_imag 
 _atom_type_scat_source 
 'C'  'C'   0.0033   0.0016 
 'International Tables Vol C Tables 4.2.6.8 and 6.1.1.4' 
 'H'  'H'   0.0000   0.0000 
 'International Tables Vol C Tables 4.2.6.8 and 6.1.1.4' 
 'Cl'  'Cl'   0.1484   0.1585 
 'International Tables Vol C Tables 4.2.6.8 and 6.1.1.4' 
 'N'  'N'   0.0061   0.0033 
 'International Tables Vol C Tables 4.2.6.8 and 6.1.1.4' 
 'O'  'O'   0.0106   0.0060 
 'International Tables Vol C Tables 4.2.6.8 and 6.1.1.4' 
 'Ni'  'Ni'   0.3393   1.1124 
 'International Tables Vol C Tables 4.2.6.8 and 6.1.1.4' 
  
_symmetry_cell_setting            Monoclinic 
_symmetry_space_group_name_H-M    P2(1)/c 
  
loop_ 
 _symmetry_equiv_pos_as_xyz 
 'x, y, z' 
 '-x, y+1/2, -z+1/2' 
 '-x, -y, -z' 
 'x, -y-1/2, z-1/2' 
  
_cell_length_a                    16.445(5) 
_cell_length_b                    21.327(7) 
_cell_length_c                    16.116(5) 
_cell_angle_alpha                 90.00 
_cell_angle_beta                  95(4) 
_cell_angle_gamma                 90.00 
_cell_volume                      5627(3) 
_cell_formula_units_Z             4 
_cell_measurement_temperature     113(2) 
_cell_measurement_reflns_used     13621 
_cell_measurement_theta_min       1.6
_cell_measurement_theta_max       27.9
  
_exptl_crystal_description        Platelet 
_exptl_crystal_colour             Yellow 
_exptl_crystal_size_max           0.22 
_exptl_crystal_size_mid           0.20 
_exptl_crystal_size_min           0.12 
_exptl_crystal_density_meas       ? 
_exptl_crystal_density_diffrn     1.290 
_exptl_crystal_density_method     'not measured' 
_exptl_crystal_F_000              2304 
_exptl_absorpt_coefficient_mu     0.672 
_exptl_absorpt_correction_type    Multi-scan 
_exptl_absorpt_correction_T_min   0.8662 
_exptl_absorpt_correction_T_max   0.9237 
_exptl_absorpt_process_details    'Jacobson, R. (1998) Private communication' 
  
_exptl_special_details 
; 
???? 
; 
  
_diffrn_ambient_temperature       113(2) 
_diffrn_radiation_wavelength      0.71070 
_diffrn_radiation_type            MoK\a 
_diffrn_radiation_source          'rotating anode' 
_diffrn_radiation_monochromator   confocal 
_diffrn_measurement_device_type   'Rigaku Saturn' 
_diffrn_measurement_method        \w 
_diffrn_detector_area_resol_mean  7.31 
_diffrn_standards_number          ? 
_diffrn_standards_interval_count  ? 
_diffrn_standards_interval_time   ? 
_diffrn_standards_decay_%         ? 
_diffrn_reflns_number             26500 
_diffrn_reflns_av_R_equivalents   0.0458 
_diffrn_reflns_av_sigmaI/netI     0.0605 
_diffrn_reflns_limit_h_min        -16 
_diffrn_reflns_limit_h_max        19 
_diffrn_reflns_limit_k_min        -20 
_diffrn_reflns_limit_k_max        25 
_diffrn_reflns_limit_l_min        -19 
_diffrn_reflns_limit_l_max        17 
_diffrn_reflns_theta_min          1.59 
_diffrn_reflns_theta_max          25.00 
_reflns_number_total              9871 
_reflns_number_gt                 8158 
_reflns_threshold_expression      >2sigma(I) 
  
_computing_data_collection        'CrystalClear (Rigaku/MSC Inc., 2005)' 
_computing_cell_refinement        'CrystalClear (Rigaku/MSC Inc., 2005)' 
_computing_data_reduction         'CrystalClear (Rigaku/MSC Inc., 2005)' 
_computing_structure_solution     'SHELXS-97 (Sheldrick, 1990)' 
_computing_structure_refinement   'SHELXL-97 (Sheldrick, 1997)' 
_computing_molecular_graphics     ? 
_computing_publication_material   'CrystalStructure 3.7.0' 
  
_refine_special_details 
; 
 Refinement of F^2^ against ALL reflections.  The weighted R-factor wR and 
 goodness of fit S are based on F^2^, conventional R-factors R are based 
 on F, with F set to zero for negative F^2^. The threshold expression of 
 F^2^ > 2sigma(F^2^) is used only for calculating R-factors(gt) etc. and is 
 not relevant to the choice of reflections for refinement.  R-factors based 
 on F^2^ are statistically about twice as large as those based on F, and R- 
 factors based on ALL data will be even larger. 
; 
  
_refine_ls_structure_factor_coef  Fsqd 
_refine_ls_matrix_type            full 
_refine_ls_weighting_scheme       calc 
_refine_ls_weighting_details 
 'calc w=1/[\s^2^(Fo^2^)+(0.0956P)^2^+29.8366P] where P=(Fo^2^+2Fc^2^)/3' 
_atom_sites_solution_primary      direct 
_atom_sites_solution_secondary    difmap 
_atom_sites_solution_hydrogens    geom 
_refine_ls_hydrogen_treatment     constr 
_refine_ls_extinction_method      SHELXL 
_refine_ls_extinction_coef        0.0051(7) 
_refine_ls_extinction_expression 
 'Fc^*^=kFc[1+0.001xFc^2^\l^3^/sin(2\q)]^-1/4^' 
_refine_ls_number_reflns          9871 
_refine_ls_number_parameters      660 
_refine_ls_number_restraints      6 
_refine_ls_R_factor_all           0.1195 
_refine_ls_R_factor_gt            0.1051 
_refine_ls_wR_factor_ref          0.2637 
_refine_ls_wR_factor_gt           0.2535 
_refine_ls_goodness_of_fit_ref    1.099 
_refine_ls_restrained_S_all       1.101 
_refine_ls_shift/su_max           0.003 
_refine_ls_shift/su_mean          0.000 
  
loop_ 
 _atom_site_label 
 _atom_site_type_symbol 
 _atom_site_fract_x 
 _atom_site_fract_y 
 _atom_site_fract_z 
 _atom_site_U_iso_or_equiv 
 _atom_site_adp_type 
 _atom_site_occupancy 
 _atom_site_symmetry_multiplicity 
 _atom_site_calc_flag 
 _atom_site_refinement_flags 
 _atom_site_disorder_assembly 
 _atom_site_disorder_group 
Ni1 Ni 0.72363(4) 0.22216(3) 0.02352(5) 0.0287(3) Uani 1 1 d . . . 
Cl1 Cl 0.70033(12) 0.04319(11) 0.76905(17) 0.0734(7) Uani 1 1 d . . . 
Cl2 Cl 0.52730(13) 0.02447(12) 0.78004(16) 0.0733(7) Uani 1 1 d . . . 
Cl3 Cl 0.1297(3) 0.2953(2) 0.1923(4) 0.188(3) Uani 1 1 d . . . 
Cl4 Cl 0.0945(2) 0.42253(18) 0.1421(3) 0.1211(12) Uani 1 1 d . . . 
O1 O 0.7405(2) 0.15694(19) 0.1037(2) 0.0298(9) Uani 1 1 d . . . 
O2 O 0.6228(2) 0.1839(2) -0.0141(3) 0.0399(11) Uani 1 1 d . . . 
N1 N 0.8680(3) 0.2402(2) 0.1333(3) 0.0301(11) Uani 1 1 d . . . 
N2 N 0.8081(3) 0.3288(2) 0.1091(3) 0.0307(11) Uani 1 1 d . . . 
N3 N 0.6446(3) 0.2842(2) -0.1180(3) 0.0372(12) Uani 1 1 d . . . 
N4 N 0.7747(3) 0.2807(2) -0.1274(3) 0.0324(11) Uani 1 1 d . . . 
C1 C 0.8061(3) 0.2676(3) 0.0828(4) 0.0296(13) Uani 1 1 d . . . 
C2 C 0.9065(4) 0.2831(3) 0.1878(4) 0.0330(13) Uani 1 1 d . . . 
H2 H 0.9513 0.2750 0.2278 0.040 Uiso 1 1 calc R . . 
C3 C 0.8691(4) 0.3381(3) 0.1737(4) 0.0345(14) Uani 1 1 d . . . 
H3 H 0.8816 0.3763 0.2024 0.041 Uiso 1 1 calc R . . 
C4 C 0.8838(3) 0.1740(3) 0.1327(3) 0.0267(12) Uani 1 1 d . . . 
C5 C 0.8155(3) 0.1340(3) 0.1189(3) 0.0268(12) Uani 1 1 d . . . 
C6 C 0.8315(3) 0.0687(3) 0.1258(4) 0.0301(13) Uani 1 1 d . . . 
C7 C 0.9119(4) 0.0493(3) 0.1414(4) 0.0321(13) Uani 1 1 d . . . 
H7 H 0.9218 0.0055 0.1458 0.039 Uiso 1 1 calc R . . 
C8 C 0.9796(3) 0.0893(3) 0.1512(4) 0.0328(13) Uani 1 1 d . . . 
C9 C 0.9637(3) 0.1530(3) 0.1469(4) 0.0326(13) Uani 1 1 d . . . 
H9 H 1.0074 0.1822 0.1536 0.039 Uiso 1 1 calc R . . 
C10 C 0.7605(4) 0.0216(3) 0.1165(4) 0.0332(13) Uani 1 1 d . . . 
C11 C 0.7121(4) 0.0292(3) 0.0301(4) 0.0398(15) Uani 1 1 d . . . 
H11A H 0.6687 -0.0024 0.0235 0.060 Uiso 1 1 calc R . . 
H11B H 0.7490 0.0237 -0.0137 0.060 Uiso 1 1 calc R . . 
H11C H 0.6879 0.0712 0.0257 0.060 Uiso 1 1 calc R . . 
C12 C 0.7906(4) -0.0471(3) 0.1235(5) 0.0451(16) Uani 1 1 d . . . 
H12A H 0.8196 -0.0541 0.1787 0.068 Uiso 1 1 calc R . . 
H12B H 0.8276 -0.0553 0.0805 0.068 Uiso 1 1 calc R . . 
H12C H 0.7437 -0.0755 0.1157 0.068 Uiso 1 1 calc R . . 
C13 C 0.7036(4) 0.0330(3) 0.1862(4) 0.0389(15) Uani 1 1 d . . . 
H13A H 0.6821 0.0759 0.1818 0.058 Uiso 1 1 calc R . . 
H13B H 0.7344 0.0273 0.2408 0.058 Uiso 1 1 calc R . . 
H13C H 0.6581 0.0031 0.1802 0.058 Uiso 1 1 calc R . . 
C14 C 1.0667(4) 0.0627(3) 0.1649(4) 0.0382(15) Uani 1 1 d . . . 
C15 C 1.1302(5) 0.1135(5) 0.1705(10) 0.111(5) Uani 1 1 d . . . 
H15A H 1.1238 0.1397 0.2194 0.167 Uiso 1 1 calc R . . 
H15B H 1.1235 0.1394 0.1200 0.167 Uiso 1 1 calc R . . 
H15C H 1.1847 0.0946 0.1756 0.167 Uiso 1 1 calc R . . 
C16 C 1.0849(6) 0.0240(6) 0.0914(7) 0.093(4) Uani 1 1 d . . . 
H16A H 1.1416 0.0095 0.0990 0.139 Uiso 1 1 calc R . . 
H16B H 1.0767 0.0495 0.0407 0.139 Uiso 1 1 calc R . . 
H16C H 1.0482 -0.0123 0.0864 0.139 Uiso 1 1 calc R . . 
C17 C 1.0776(6) 0.0283(9) 0.2418(8) 0.174(9) Uani 1 1 d . . . 
H17A H 1.0340 -0.0029 0.2431 0.260 Uiso 1 1 calc R . . 
H17B H 1.0756 0.0572 0.2887 0.260 Uiso 1 1 calc R . . 
H17C H 1.1306 0.0070 0.2459 0.260 Uiso 1 1 calc R . . 
C18 C 0.7540(4) 0.3762(3) 0.0706(4) 0.0346(14) Uani 1 1 d . . . 
C19 C 0.7875(4) 0.4269(3) 0.0306(4) 0.0357(14) Uani 1 1 d . . . 
C20 C 0.7335(5) 0.4659(3) -0.0163(5) 0.0493(17) Uani 1 1 d . . . 
H20 H 0.7551 0.4995 -0.0460 0.059 Uiso 1 1 calc R . . 
C21 C 0.6498(5) 0.4581(4) -0.0219(5) 0.0546(19) Uani 1 1 d . . . 
C22 C 0.6194(4) 0.4115(4) 0.0259(5) 0.0519(18) Uani 1 1 d . . . 
H22 H 0.5619 0.4077 0.0263 0.062 Uiso 1 1 calc R . . 
C23 C 0.6694(4) 0.3700(3) 0.0733(4) 0.0409(15) Uani 1 1 d . . . 
C24 C 0.8778(4) 0.4391(3) 0.0375(4) 0.0459(16) Uani 1 1 d . . . 
H24A H 0.8954 0.4549 0.0935 0.069 Uiso 1 1 calc R . . 
H24B H 0.8901 0.4705 -0.0040 0.069 Uiso 1 1 calc R . . 
H24C H 0.9068 0.4001 0.0277 0.069 Uiso 1 1 calc R . . 
C25 C 0.5930(6) 0.4981(5) -0.0783(6) 0.081(3) Uani 1 1 d . . . 
H25A H 0.5396 0.4774 -0.0875 0.122 Uiso 1 1 calc R . . 
H25B H 0.6158 0.5037 -0.1319 0.122 Uiso 1 1 calc R . . 
H25C H 0.5865 0.5391 -0.0523 0.122 Uiso 1 1 calc R . . 
C26 C 0.6324(4) 0.3227(3) 0.1292(5) 0.0486(18) Uani 1 1 d . . . 
H26A H 0.6077 0.2884 0.0952 0.073 Uiso 1 1 calc R . . 
H26B H 0.5904 0.3433 0.1589 0.073 Uiso 1 1 calc R . . 
H26C H 0.6752 0.3060 0.1696 0.073 Uiso 1 1 calc R . . 
C27 C 0.7164(3) 0.2685(3) -0.0737(4) 0.0306(13) Uani 1 1 d . . . 
C28 C 0.6581(4) 0.3056(3) -0.1969(4) 0.0416(16) Uani 1 1 d . . . 
H28 H 0.6174 0.3192 -0.2387 0.050 Uiso 1 1 calc R . . 
C29 C 0.7380(4) 0.3036(3) -0.2035(4) 0.0405(15) Uani 1 1 d . . . 
H29 H 0.7651 0.3154 -0.2507 0.049 Uiso 1 1 calc R . . 
C30 C 0.5668(4) 0.2726(3) -0.0892(4) 0.0401(15) Uani 1 1 d . . . 
C31 C 0.5581(4) 0.2196(3) -0.0382(4) 0.0400(15) Uani 1 1 d . . . 
C32 C 0.4786(4) 0.2068(3) -0.0146(4) 0.0381(15) Uani 1 1 d . . . 
C33 C 0.4151(4) 0.2467(3) -0.0437(4) 0.0438(16) Uani 1 1 d . . . 
H33 H 0.3619 0.2367 -0.0295 0.053 Uiso 1 1 calc R . . 
C34 C 0.4234(4) 0.2999(3) -0.0917(5) 0.0454(17) Uani 1 1 d . . . 
C35 C 0.5016(4) 0.3121(3) -0.1153(5) 0.0455(17) Uani 1 1 d . . . 
H35 H 0.5104 0.3474 -0.1493 0.055 Uiso 1 1 calc R . . 
C36 C 0.4638(4) 0.1502(3) 0.0415(4) 0.0371(14) Uani 1 1 d . . . 
C37 C 0.4865(4) 0.0889(3) -0.0026(4) 0.0411(15) Uani 1 1 d . . . 
H37A H 0.4545 0.0858 -0.0568 0.062 Uiso 1 1 calc R . . 
H37B H 0.4747 0.0528 0.0319 0.062 Uiso 1 1 calc R . . 
H37C H 0.5449 0.0894 -0.0107 0.062 Uiso 1 1 calc R . . 
C38 C 0.3745(4) 0.1442(3) 0.0597(5) 0.0467(17) Uani 1 1 d . . . 
H38A H 0.3402 0.1373 0.0074 0.070 Uiso 1 1 calc R . . 
H38B H 0.3574 0.1828 0.0860 0.070 Uiso 1 1 calc R . . 
H38C H 0.3687 0.1087 0.0972 0.070 Uiso 1 1 calc R . . 
C39 C 0.5172(4) 0.1557(3) 0.1249(4) 0.0405(15) Uani 1 1 d . . . 
H39A H 0.5082 0.1190 0.1596 0.061 Uiso 1 1 calc R . . 
H39B H 0.5024 0.1938 0.1540 0.061 Uiso 1 1 calc R . . 
H39C H 0.5748 0.1577 0.1144 0.061 Uiso 1 1 calc R . . 
C40 C 0.3492(4) 0.3400(4) -0.1229(5) 0.056(2) Uani 1 1 d . . . 
C41 C 0.2938(6) 0.2963(6) -0.1860(7) 0.092(3) Uani 1 1 d . . . 
H41A H 0.2408 0.3164 -0.2002 0.138 Uiso 1 1 calc R . . 
H41B H 0.2857 0.2556 -0.1597 0.138 Uiso 1 1 calc R . . 
H41C H 0.3211 0.2900 -0.2369 0.138 Uiso 1 1 calc R . . 
C42 C 0.2937(6) 0.3504(5) -0.0553(9) 0.105(4) Uani 1 1 d . . . 
H42A H 0.3236 0.3722 -0.0084 0.158 Uiso 1 1 calc R . . 
H42B H 0.2742 0.3099 -0.0364 0.158 Uiso 1 1 calc R . . 
H42C H 0.2469 0.3760 -0.0771 0.158 Uiso 1 1 calc R . . 
C43 C 0.3687(6) 0.3949(7) -0.1641(15) 0.232(13) Uani 1 1 d . . . 
H43A H 0.4016 0.4223 -0.1254 0.348 Uiso 1 1 calc R . . 
H43B H 0.3183 0.4166 -0.1848 0.348 Uiso 1 1 calc R . . 
H43C H 0.3999 0.3843 -0.2111 0.348 Uiso 1 1 calc R . . 
C44 C 0.8601(3) 0.2662(3) -0.1119(3) 0.0305(13) Uani 1 1 d . . . 
C45 C 0.9179(4) 0.3141(3) -0.1189(4) 0.0329(13) Uani 1 1 d . . . 
C46 C 1.0009(4) 0.2977(4) -0.1034(4) 0.0434(16) Uani 1 1 d . . . 
H46 H 1.0410 0.3295 -0.1063 0.052 Uiso 1 1 calc R . . 
C47 C 1.0264(4) 0.2375(4) -0.0842(4) 0.0451(16) Uani 1 1 d . . . 
C48 C 0.9668(4) 0.1915(3) -0.0816(4) 0.0411(15) Uani 1 1 d . . . 
H48 H 0.9834 0.1498 -0.0680 0.049 Uiso 1 1 calc R . . 
C49 C 0.8836(4) 0.2041(3) -0.0983(4) 0.0333(13) Uani 1 1 d . . . 
C50 C 0.8934(4) 0.3795(3) -0.1463(4) 0.0381(14) Uani 1 1 d . . . 
H50A H 0.8856 0.3812 -0.2073 0.057 Uiso 1 1 calc R . . 
H50B H 0.9363 0.4091 -0.1260 0.057 Uiso 1 1 calc R . . 
H50C H 0.8422 0.3908 -0.1234 0.057 Uiso 1 1 calc R . . 
C51 C 1.1160(4) 0.2217(4) -0.0655(6) 0.063(2) Uani 1 1 d . . . 
H51A H 1.1493 0.2574 -0.0801 0.095 Uiso 1 1 calc R . . 
H51B H 1.1293 0.1850 -0.0984 0.095 Uiso 1 1 calc R . . 
H51C H 1.1274 0.2123 -0.0061 0.095 Uiso 1 1 calc R . . 
C52 C 0.8237(4) 0.1497(3) -0.1041(4) 0.0404(15) Uani 1 1 d . . . 
H52A H 0.8511 0.1119 -0.1220 0.061 Uiso 1 1 calc R . . 
H52B H 0.7774 0.1597 -0.1446 0.061 Uiso 1 1 calc R . . 
H52C H 0.8041 0.1424 -0.0493 0.061 Uiso 1 1 calc R . . 
C53 C 0.6170(5) 0.0562(5) 0.8276(5) 0.072(3) Uani 1 1 d . . . 
H53A H 0.6287 0.0372 0.8836 0.086 Uiso 1 1 calc R . . 
H53B H 0.6097 0.1018 0.8350 0.086 Uiso 1 1 calc R . . 
C54 C 0.1080(11) 0.3486(9) 0.1044(10) 0.167(8) Uani 1 1 d . . . 
H54A H 0.1539 0.3484 0.0689 0.201 Uiso 1 1 calc R . . 
H54B H 0.0580 0.3350 0.0701 0.201 Uiso 1 1 calc R . . 
Cl5 Cl 0.4627(3) 0.1882(2) 0.7668(3) 0.0663(15) Uani 0.485(6) 1 d PD A 1 
Cl6 Cl 0.3173(3) 0.1326(4) 0.6876(4) 0.109(3) Uani 0.485(6) 1 d PD A 1 
C55 C 0.4167(7) 0.1538(8) 0.6780(8) 0.079(7) Uani 0.485(6) 1 d PD A 1 
H55A H 0.4180 0.1834 0.6308 0.095 Uiso 0.485(6) 1 calc PR A 1 
H55B H 0.4482 0.1160 0.6649 0.095 Uiso 0.485(6) 1 calc PR A 1 
Cl5' Cl 0.3397(4) 0.1308(4) 0.7799(4) 0.124(3) Uani 0.515(6) 1 d PD A 2 
Cl6' Cl 0.4080(3) 0.1885(3) 0.6427(3) 0.0788(17) Uani 0.515(6) 1 d PD A 2 
C55' C 0.4167(11) 0.1732(12) 0.7469(7) 0.099(9) Uani 0.515(6) 1 d PD A 2 
H55C H 0.4686 0.1505 0.7615 0.118 Uiso 0.515(6) 1 calc PR A 2 
H55D H 0.4200 0.2136 0.7774 0.118 Uiso 0.515(6) 1 calc PR A 2 
  
loop_ 
 _atom_site_aniso_label 
 _atom_site_aniso_U_11 
 _atom_site_aniso_U_22 
 _atom_site_aniso_U_33 
 _atom_site_aniso_U_23 
 _atom_site_aniso_U_13 
 _atom_site_aniso_U_12 
Ni1 0.0196(4) 0.0319(4) 0.0336(4) 0.0036(3) -0.0030(3) -0.0014(3) 
Cl1 0.0454(11) 0.0663(14) 0.1087(18) -0.0311(13) 0.0082(11) -0.0081(9) 
Cl2 0.0462(11) 0.0826(16) 0.0908(16) -0.0236(13) 0.0043(10) -0.0116(10) 
Cl3 0.108(3) 0.156(4) 0.283(6) 0.104(4) -0.080(4) -0.048(3) 
Cl4 0.098(2) 0.114(3) 0.148(3) 0.016(2) -0.005(2) -0.006(2) 
O1 0.0186(19) 0.034(2) 0.036(2) 0.0009(17) -0.0005(16) 0.0007(16) 
O2 0.024(2) 0.032(2) 0.061(3) 0.008(2) -0.010(2) -0.0010(17) 
N1 0.025(2) 0.030(3) 0.034(3) 0.001(2) -0.003(2) 0.000(2) 
N2 0.029(3) 0.037(3) 0.026(2) 0.000(2) 0.001(2) -0.002(2) 
N3 0.025(3) 0.042(3) 0.043(3) 0.009(2) -0.007(2) -0.003(2) 
N4 0.025(2) 0.038(3) 0.033(3) 0.004(2) -0.003(2) -0.001(2) 
C1 0.022(3) 0.031(3) 0.036(3) 0.004(2) 0.003(2) 0.004(2) 
C2 0.030(3) 0.040(3) 0.028(3) 0.000(3) -0.006(2) -0.003(3) 
C3 0.036(3) 0.036(3) 0.030(3) -0.002(3) -0.003(3) -0.011(3) 
C4 0.024(3) 0.031(3) 0.024(3) 0.002(2) -0.003(2) -0.001(2) 
C5 0.024(3) 0.036(3) 0.021(3) 0.000(2) 0.006(2) 0.004(2) 
C6 0.027(3) 0.033(3) 0.030(3) -0.007(2) -0.002(2) 0.005(2) 
C7 0.035(3) 0.033(3) 0.028(3) -0.006(2) 0.001(2) 0.010(3) 
C8 0.028(3) 0.046(4) 0.024(3) -0.007(3) 0.000(2) 0.005(3) 
C9 0.025(3) 0.041(3) 0.031(3) -0.005(3) -0.002(2) 0.002(3) 
C10 0.031(3) 0.026(3) 0.041(3) -0.003(3) -0.002(3) 0.003(2) 
C11 0.029(3) 0.039(4) 0.050(4) -0.010(3) -0.005(3) -0.006(3) 
C12 0.042(4) 0.036(4) 0.054(4) -0.008(3) -0.007(3) 0.001(3) 
C13 0.035(3) 0.035(3) 0.047(4) 0.002(3) 0.002(3) -0.001(3) 
C14 0.023(3) 0.051(4) 0.040(4) -0.003(3) -0.004(3) 0.008(3) 
C15 0.032(5) 0.090(8) 0.207(14) -0.001(9) -0.020(6) 0.009(5) 
C16 0.055(5) 0.120(9) 0.103(8) -0.037(7) 0.005(5) 0.030(6) 
C17 0.056(6) 0.35(2) 0.118(10) 0.142(13) 0.035(6) 0.114(11) 
C18 0.035(3) 0.028(3) 0.040(3) -0.002(3) 0.001(3) 0.004(3) 
C19 0.043(4) 0.034(3) 0.029(3) 0.000(3) 0.002(3) 0.001(3) 
C20 0.061(5) 0.036(4) 0.050(4) 0.006(3) -0.001(3) 0.000(3) 
C21 0.057(5) 0.050(4) 0.055(5) 0.008(4) -0.006(4) 0.019(4) 
C22 0.037(4) 0.048(4) 0.069(5) -0.001(4) 0.000(3) 0.012(3) 
C23 0.036(3) 0.036(3) 0.051(4) -0.005(3) 0.003(3) 0.004(3) 
C24 0.047(4) 0.045(4) 0.045(4) -0.001(3) 0.001(3) -0.008(3) 
C25 0.072(6) 0.083(7) 0.083(7) 0.021(5) -0.018(5) 0.030(5) 
C26 0.038(4) 0.045(4) 0.066(5) 0.000(3) 0.017(3) 0.005(3) 
C27 0.017(3) 0.031(3) 0.043(3) -0.001(3) -0.003(2) -0.003(2) 
C28 0.034(3) 0.050(4) 0.037(4) 0.014(3) -0.013(3) -0.002(3) 
C29 0.042(4) 0.046(4) 0.032(3) 0.011(3) -0.006(3) -0.005(3) 
C30 0.020(3) 0.043(4) 0.055(4) 0.009(3) -0.007(3) -0.003(3) 
C31 0.028(3) 0.033(3) 0.055(4) 0.005(3) -0.015(3) -0.003(3) 
C32 0.022(3) 0.033(3) 0.056(4) 0.000(3) -0.008(3) -0.004(2) 
C33 0.026(3) 0.050(4) 0.053(4) -0.001(3) -0.009(3) -0.004(3) 
C34 0.028(3) 0.042(4) 0.063(5) 0.007(3) -0.010(3) 0.005(3) 
C35 0.030(3) 0.042(4) 0.061(5) 0.009(3) -0.011(3) -0.002(3) 
C36 0.025(3) 0.038(3) 0.047(4) -0.002(3) -0.004(3) -0.003(3) 
C37 0.031(3) 0.041(4) 0.050(4) -0.005(3) -0.005(3) -0.008(3) 
C38 0.028(3) 0.049(4) 0.062(5) -0.005(3) -0.003(3) -0.006(3) 
C39 0.033(3) 0.042(4) 0.046(4) 0.005(3) 0.001(3) -0.003(3) 
C40 0.037(4) 0.070(5) 0.059(5) 0.005(4) -0.007(3) 0.026(4) 
C41 0.052(5) 0.111(9) 0.107(8) 0.015(7) -0.021(5) 0.019(5) 
C42 0.066(6) 0.075(7) 0.176(13) 0.047(8) 0.017(7) 0.030(5) 
C43 0.050(6) 0.157(13) 0.50(3) 0.250(19) 0.067(12) 0.054(7) 
C44 0.025(3) 0.046(4) 0.021(3) 0.001(2) 0.001(2) -0.002(2) 
C45 0.031(3) 0.042(4) 0.026(3) -0.003(3) 0.002(2) -0.005(3) 
C46 0.036(3) 0.058(4) 0.036(4) 0.002(3) -0.002(3) -0.012(3) 
C47 0.031(3) 0.060(5) 0.043(4) 0.004(3) -0.004(3) -0.001(3) 
C48 0.036(3) 0.049(4) 0.039(4) 0.003(3) 0.003(3) 0.004(3) 
C49 0.033(3) 0.037(3) 0.030(3) -0.003(3) 0.005(2) -0.004(3) 
C50 0.043(4) 0.039(4) 0.032(3) -0.002(3) 0.003(3) -0.010(3) 
C51 0.033(4) 0.077(6) 0.081(6) 0.009(5) 0.006(4) 0.003(4) 
C52 0.037(3) 0.041(4) 0.043(4) 0.000(3) 0.004(3) -0.004(3) 
C53 0.052(5) 0.114(8) 0.048(5) -0.007(5) -0.008(4) -0.018(5) 
C54 0.149(15) 0.24(2) 0.112(12) -0.083(14) 0.020(10) 0.005(14) 
Cl5 0.066(3) 0.070(3) 0.064(3) -0.003(2) 0.012(2) 0.010(2) 
Cl6 0.054(3) 0.150(6) 0.122(6) -0.012(5) 0.010(3) -0.010(3) 
C55 0.099(16) 0.054(11) 0.080(15) 0.047(12) -0.018(12) 0.007(10) 
Cl5' 0.119(5) 0.143(6) 0.112(5) 0.032(4) 0.015(4) -0.046(4) 
Cl6' 0.080(3) 0.083(4) 0.075(3) 0.002(3) 0.015(2) -0.003(3) 
C55' 0.057(12) 0.14(2) 0.087(16) -0.012(14) -0.029(11) -0.054(14) 
  
_geom_special_details 
; 
 All esds (except the esd in the dihedral angle between two l.s. planes) 
 are estimated using the full covariance matrix.  The cell esds are taken 
 into account individually in the estimation of esds in distances, angles 
 and torsion angles; correlations between esds in cell parameters are only 
 used when they are defined by crystal symmetry.  An approximate (isotropic) 
 treatment of cell esds is used for estimating esds involving l.s. planes. 
; 
  
loop_ 
 _geom_bond_atom_site_label_1 
 _geom_bond_atom_site_label_2 
 _geom_bond_distance 
 _geom_bond_site_symmetry_2 
 _geom_bond_publ_flag 
Ni1 C27 1.847(9) . ? 
Ni1 C1 1.86(5) . ? 
Ni1 O2 1.90(4) . ? 
Ni1 O1 1.901(14) . ? 
Cl1 C53 1.76(5) . ? 
Cl2 C53 1.73(5) . ? 
Cl3 C54 1.82(3) . ? 
Cl4 C54 1.711(18) . ? 
O1 C5 1.328(17) . ? 
O2 C31 1.34(2) . ? 
N1 C1 1.37(4) . ? 
N1 C2 1.38(3) . ? 
N1 C4 1.436(7) . ? 
N2 C1 1.372(8) . ? 
N2 C3 1.39(5) . ? 
N2 C18 1.45(3) . ? 
N3 C27 1.36(4) . ? 
N3 C28 1.388(16) . ? 
N3 C30 1.42(3) . ? 
N4 C27 1.38(4) . ? 
N4 C29 1.40(4) . ? 
N4 C44 1.436(18) . ? 
C2 C3 1.334(11) . ? 
C2 H2 0.9500 . ? 
C3 H3 0.9500 . ? 
C4 C9 1.387(17) . ? 
C4 C5 1.410(14) . ? 
C5 C6 1.421(8) . ? 
C6 C7 1.385(18) . ? 
C6 C10 1.537(11) . ? 
C7 C8 1.400(12) . ? 
C7 H7 0.9500 . ? 
C8 C9 1.383(9) . ? 
C8 C14 1.537(16) . ? 
C9 H9 0.9500 . ? 
C10 C12 1.547(9) . ? 
C10 C11 1.55(5) . ? 
C10 C13 1.55(5) . ? 
C11 H11A 0.9800 . ? 
C11 H11B 0.9800 . ? 
C11 H11C 0.9800 . ? 
C12 H12A 0.9800 . ? 
C12 H12B 0.9800 . ? 
C12 H12C 0.9800 . ? 
C13 H13A 0.9800 . ? 
C13 H13B 0.9800 . ? 
C13 H13C 0.9800 . ? 
C14 C17 1.437(16) . ? 
C14 C16 1.50(2) . ? 
C14 C15 1.502(13) . ? 
C15 H15A 0.9800 . ? 
C15 H15B 0.9800 . ? 
C15 H15C 0.9800 . ? 
C16 H16A 0.9800 . ? 
C16 H16B 0.9800 . ? 
C16 H16C 0.9800 . ? 
C17 H17A 0.9800 . ? 
C17 H17B 0.9800 . ? 
C17 H17C 0.9800 . ? 
C18 C19 1.398(19) . ? 
C18 C23 1.403(9) . ? 
C19 C20 1.39(3) . ? 
C19 C24 1.500(12) . ? 
C20 C21 1.381(12) . ? 
C20 H20 0.9500 . ? 
C21 C22 1.38(2) . ? 
C21 C25 1.51(4) . ? 
C22 C23 1.39(3) . ? 
C22 H22 0.9500 . ? 
C23 C26 1.52(3) . ? 
C24 H24A 0.9800 . ? 
C24 H24B 0.9800 . ? 
C24 H24C 0.9800 . ? 
C25 H25A 0.9800 . ? 
C25 H25B 0.9800 . ? 
C25 H25C 0.9800 . ? 
C26 H26A 0.9800 . ? 
C26 H26B 0.9800 . ? 
C26 H26C 0.9800 . ? 
C28 C29 1.329(12) . ? 
C28 H28 0.9500 . ? 
C29 H29 0.9500 . ? 
C30 C35 1.40(2) . ? 
C30 C31 1.412(11) . ? 
C31 C32 1.42(3) . ? 
C32 C33 1.39(3) . ? 
C32 C36 1.542(13) . ? 
C33 C34 1.388(11) . ? 
C33 H33 0.9500 . ? 
C34 C35 1.40(3) . ? 
C34 C40 1.54(3) . ? 
C35 H35 0.9500 . ? 
C36 C38 1.53(2) . ? 
C36 C39 1.54(5) . ? 
C36 C37 1.550(15) . ? 
C37 H37A 0.9800 . ? 
C37 H37B 0.9800 . ? 
C37 H37C 0.9800 . ? 
C38 H38A 0.9800 . ? 
C38 H38B 0.9800 . ? 
C38 H38C 0.9800 . ? 
C39 H39A 0.9800 . ? 
C39 H39B 0.9800 . ? 
C39 H39C 0.9800 . ? 
C40 C43 1.398(17) . ? 
C40 C42 1.50(5) . ? 
C40 C41 1.60(4) . ? 
C41 H41A 0.9800 . ? 
C41 H41B 0.9800 . ? 
C41 H41C 0.9800 . ? 
C42 H42A 0.9800 . ? 
C42 H42B 0.9800 . ? 
C42 H42C 0.9800 . ? 
C43 H43A 0.9800 . ? 
C43 H43B 0.9800 . ? 
C43 H43C 0.9800 . ? 
C44 C49 1.391(10) . ? 
C44 C45 1.407(10) . ? 
C45 C46 1.409(19) . ? 
C45 C50 1.507(12) . ? 
C46 C47 1.376(12) . ? 
C46 H46 0.9500 . ? 
C47 C48 1.390(10) . ? 
C47 C51 1.51(2) . ? 
C48 C49 1.40(2) . ? 
C48 H48 0.9500 . ? 
C49 C52 1.518(9) . ? 
C50 H50A 0.9800 . ? 
C50 H50B 0.9800 . ? 
C50 H50C 0.9800 . ? 
C51 H51A 0.9800 . ? 
C51 H51B 0.9800 . ? 
C51 H51C 0.9800 . ? 
C52 H52A 0.9800 . ? 
C52 H52B 0.9800 . ? 
C52 H52C 0.9800 . ? 
C53 H53A 0.9900 . ? 
C53 H53B 0.9900 . ? 
C54 H54A 0.9900 . ? 
C54 H54B 0.9900 . ? 
Cl5 C55 1.72(4) . ? 
Cl6 C55 1.717(14) . ? 
C55 H55A 0.9900 . ? 
C55 H55B 0.9900 . ? 
Cl5' C55' 1.68(3) . ? 
Cl6' C55' 1.703(13) . ? 
C55' H55C 0.9900 . ? 
C55' H55D 0.9900 . ? 
  
loop_ 
 _geom_angle_atom_site_label_1 
 _geom_angle_atom_site_label_2 
 _geom_angle_atom_site_label_3 
 _geom_angle 
 _geom_angle_site_symmetry_1 
 _geom_angle_site_symmetry_3 
 _geom_angle_publ_flag 
C27 Ni1 C1 98(2) . . ? 
C27 Ni1 O2 89(3) . . ? 
C1 Ni1 O2 164.5(8) . . ? 
C27 Ni1 O1 164.1(4) . . ? 
C1 Ni1 O1 89(2) . . ? 
O2 Ni1 O1 88(3) . . ? 
C5 O1 Ni1 118(2) . . ? 
C31 O2 Ni1 119.8(12) . . ? 
C1 N1 C2 111(2) . . ? 
C1 N1 C4 122.7(8) . . ? 
C2 N1 C4 125.7(14) . . ? 
C1 N2 C3 111.2(5) . . ? 
C1 N2 C18 122.5(17) . . ? 
C3 N2 C18 126.3(15) . . ? 
C27 N3 C28 111(3) . . ? 
C27 N3 C30 123.2(7) . . ? 
C28 N3 C30 126(3) . . ? 
C27 N4 C29 110.4(14) . . ? 
C27 N4 C44 125.3(17) . . ? 
C29 N4 C44 124(3) . . ? 
N2 C1 N1 103.2(15) . . ? 
N2 C1 Ni1 130.6(4) . . ? 
N1 C1 Ni1 123.3(18) . . ? 
C3 C2 N1 107(2) . . ? 
C3 C2 H2 126.3 . . ? 
N1 C2 H2 126.3 . . ? 
C2 C3 N2 106.8(13) . . ? 
C2 C3 H3 126.6 . . ? 
N2 C3 H3 126.6 . . ? 
C9 C4 C5 124.0(8) . . ? 
C9 C4 N1 119.1(5) . . ? 
C5 C4 N1 116.9(6) . . ? 
O1 C5 C4 121.3(8) . . ? 
O1 C5 C6 122.5(5) . . ? 
C4 C5 C6 116.2(8) . . ? 
C7 C6 C5 118.2(5) . . ? 
C7 C6 C10 121.7(7) . . ? 
C5 C6 C10 120.0(7) . . ? 
C6 C7 C8 125.1(7) . . ? 
C6 C7 H7 117.5 . . ? 
C8 C7 H7 117.5 . . ? 
C9 C8 C7 116.6(7) . . ? 
C9 C8 C14 122.6(6) . . ? 
C7 C8 C14 120.8(7) . . ? 
C8 C9 C4 119.8(6) . . ? 
C8 C9 H9 120.1 . . ? 
C4 C9 H9 120.1 . . ? 
C6 C10 C12 112.2(7) . . ? 
C6 C10 C11 110(2) . . ? 
C12 C10 C11 107.4(9) . . ? 
C6 C10 C13 109.4(16) . . ? 
C12 C10 C13 107.9(6) . . ? 
C11 C10 C13 109.9(9) . . ? 
C10 C11 H11A 109.5 . . ? 
C10 C11 H11B 109.5 . . ? 
H11A C11 H11B 109.5 . . ? 
C10 C11 H11C 109.5 . . ? 
H11A C11 H11C 109.5 . . ? 
H11B C11 H11C 109.5 . . ? 
C10 C12 H12A 109.5 . . ? 
C10 C12 H12B 109.5 . . ? 
H12A C12 H12B 109.5 . . ? 
C10 C12 H12C 109.5 . . ? 
H12A C12 H12C 109.5 . . ? 
H12B C12 H12C 109.5 . . ? 
C10 C13 H13A 109.5 . . ? 
C10 C13 H13B 109.5 . . ? 
H13A C13 H13B 109.5 . . ? 
C10 C13 H13C 109.5 . . ? 
H13A C13 H13C 109.5 . . ? 
H13B C13 H13C 109.5 . . ? 
C17 C14 C16 112.5(10) . . ? 
C17 C14 C15 107(3) . . ? 
C16 C14 C15 105(2) . . ? 
C17 C14 C8 111(3) . . ? 
C16 C14 C8 110(3) . . ? 
C15 C14 C8 112.0(7) . . ? 
C14 C15 H15A 109.5 . . ? 
C14 C15 H15B 109.5 . . ? 
H15A C15 H15B 109.5 . . ? 
C14 C15 H15C 109.5 . . ? 
H15A C15 H15C 109.5 . . ? 
H15B C15 H15C 109.5 . . ? 
C14 C16 H16A 109.5 . . ? 
C14 C16 H16B 109.5 . . ? 
H16A C16 H16B 109.5 . . ? 
C14 C16 H16C 109.5 . . ? 
H16A C16 H16C 109.5 . . ? 
H16B C16 H16C 109.5 . . ? 
C14 C17 H17A 109.5 . . ? 
C14 C17 H17B 109.5 . . ? 
H17A C17 H17B 109.5 . . ? 
C14 C17 H17C 109.5 . . ? 
H17A C17 H17C 109.5 . . ? 
H17B C17 H17C 109.5 . . ? 
C19 C18 C23 121.5(17) . . ? 
C19 C18 N2 119.0(6) . . ? 
C23 C18 N2 119.4(14) . . ? 
C20 C19 C18 117.0(6) . . ? 
C20 C19 C24 121.0(18) . . ? 
C18 C19 C24 122.0(18) . . ? 
C21 C20 C19 123.1(18) . . ? 
C21 C20 H20 118.4 . . ? 
C19 C20 H20 118.4 . . ? 
C22 C21 C20 118(2) . . ? 
C22 C21 C25 120.5(8) . . ? 
C20 C21 C25 122(2) . . ? 
C21 C22 C23 122.7(7) . . ? 
C21 C22 H22 118.6 . . ? 
C23 C22 H22 118.6 . . ? 
C22 C23 C18 117.4(18) . . ? 
C22 C23 C26 120.1(7) . . ? 
C18 C23 C26 122(2) . . ? 
C19 C24 H24A 109.5 . . ? 
C19 C24 H24B 109.5 . . ? 
H24A C24 H24B 109.5 . . ? 
C19 C24 H24C 109.5 . . ? 
H24A C24 H24C 109.5 . . ? 
H24B C24 H24C 109.5 . . ? 
C21 C25 H25A 109.5 . . ? 
C21 C25 H25B 109.5 . . ? 
H25A C25 H25B 109.5 . . ? 
C21 C25 H25C 109.5 . . ? 
H25A C25 H25C 109.5 . . ? 
H25B C25 H25C 109.5 . . ? 
C23 C26 H26A 109.5 . . ? 
C23 C26 H26B 109.5 . . ? 
H26A C26 H26B 109.5 . . ? 
C23 C26 H26C 109.5 . . ? 
H26A C26 H26C 109.5 . . ? 
H26B C26 H26C 109.5 . . ? 
N3 C27 N4 104.2(9) . . ? 
N3 C27 Ni1 124(2) . . ? 
N4 C27 Ni1 129.9(16) . . ? 
C29 C28 N3 108(4) . . ? 
C29 C28 H28 126.0 . . ? 
N3 C28 H28 126.0 . . ? 
C28 C29 N4 107(3) . . ? 
C28 C29 H29 126.6 . . ? 
N4 C29 H29 126.6 . . ? 
C35 C30 C31 122.7(16) . . ? 
C35 C30 N3 119.1(6) . . ? 
C31 C30 N3 118.2(18) . . ? 
O2 C31 C30 120.3(17) . . ? 
O2 C31 C32 122.6(6) . . ? 
C30 C31 C32 117.1(19) . . ? 
C33 C32 C31 118.1(8) . . ? 
C33 C32 C36 121.4(15) . . ? 
C31 C32 C36 120.5(19) . . ? 
C34 C33 C32 125.2(14) . . ? 
C34 C33 H33 117.4 . . ? 
C32 C33 H33 117.4 . . ? 
C33 C34 C35 116.4(19) . . ? 
C33 C34 C40 121.4(15) . . ? 
C35 C34 C40 122.1(8) . . ? 
C30 C35 C34 120.4(7) . . ? 
C30 C35 H35 119.8 . . ? 
C34 C35 H35 119.8 . . ? 
C38 C36 C39 109(3) . . ? 
C38 C36 C32 113(2) . . ? 
C39 C36 C32 110.1(6) . . ? 
C38 C36 C37 107.2(17) . . ? 
C39 C36 C37 108.8(6) . . ? 
C32 C36 C37 109.5(13) . . ? 
C36 C37 H37A 109.5 . . ? 
C36 C37 H37B 109.5 . . ? 
H37A C37 H37B 109.5 . . ? 
C36 C37 H37C 109.5 . . ? 
H37A C37 H37C 109.5 . . ? 
H37B C37 H37C 109.5 . . ? 
C36 C38 H38A 109.5 . . ? 
C36 C38 H38B 109.5 . . ? 
H38A C38 H38B 109.5 . . ? 
C36 C38 H38C 109.5 . . ? 
H38A C38 H38C 109.5 . . ? 
H38B C38 H38C 109.5 . . ? 
C36 C39 H39A 109.5 . . ? 
C36 C39 H39B 109.5 . . ? 
H39A C39 H39B 109.5 . . ? 
C36 C39 H39C 109.5 . . ? 
H39A C39 H39C 109.5 . . ? 
H39B C39 H39C 109.5 . . ? 
C43 C40 C42 113.7(15) . . ? 
C43 C40 C34 114.3(13) . . ? 
C42 C40 C34 111.3(15) . . ? 
C43 C40 C41 109.1(15) . . ? 
C42 C40 C41 101.5(8) . . ? 
C34 C40 C41 106(2) . . ? 
C40 C41 H41A 109.5 . . ? 
C40 C41 H41B 109.5 . . ? 
H41A C41 H41B 109.5 . . ? 
C40 C41 H41C 109.5 . . ? 
H41A C41 H41C 109.5 . . ? 
H41B C41 H41C 109.5 . . ? 
C40 C42 H42A 109.5 . . ? 
C40 C42 H42B 109.5 . . ? 
H42A C42 H42B 109.5 . . ? 
C40 C42 H42C 109.5 . . ? 
H42A C42 H42C 109.5 . . ? 
H42B C42 H42C 109.5 . . ? 
C40 C43 H43A 109.5 . . ? 
C40 C43 H43B 109.5 . . ? 
H43A C43 H43B 109.5 . . ? 
C40 C43 H43C 109.5 . . ? 
H43A C43 H43C 109.5 . . ? 
H43B C43 H43C 109.5 . . ? 
C49 C44 C45 121.6(7) . . ? 
C49 C44 N4 119.1(7) . . ? 
C45 C44 N4 119.1(6) . . ? 
C44 C45 C46 117.2(6) . . ? 
C44 C45 C50 122.1(10) . . ? 
C46 C45 C50 120.6(11) . . ? 
C47 C46 C45 122.7(9) . . ? 
C47 C46 H46 118.7 . . ? 
C45 C46 H46 118.7 . . ? 
C46 C47 C48 117.8(10) . . ? 
C46 C47 C51 121.5(9) . . ? 
C48 C47 C51 120.7(7) . . ? 
C47 C48 C49 122.6(7) . . ? 
C47 C48 H48 118.7 . . ? 
C49 C48 H48 118.7 . . ? 
C44 C49 C48 117.8(7) . . ? 
C44 C49 C52 123.3(9) . . ? 
C48 C49 C52 118.8(7) . . ? 
C45 C50 H50A 109.5 . . ? 
C45 C50 H50B 109.5 . . ? 
H50A C50 H50B 109.5 . . ? 
C45 C50 H50C 109.5 . . ? 
H50A C50 H50C 109.5 . . ? 
H50B C50 H50C 109.5 . . ? 
C47 C51 H51A 109.5 . . ? 
C47 C51 H51B 109.5 . . ? 
H51A C51 H51B 109.5 . . ? 
C47 C51 H51C 109.5 . . ? 
H51A C51 H51C 109.5 . . ? 
H51B C51 H51C 109.5 . . ? 
C49 C52 H52A 109.5 . . ? 
C49 C52 H52B 109.5 . . ? 
H52A C52 H52B 109.5 . . ? 
C49 C52 H52C 109.5 . . ? 
H52A C52 H52C 109.5 . . ? 
H52B C52 H52C 109.5 . . ? 
Cl2 C53 Cl1 112.0(6) . . ? 
Cl2 C53 H53A 109.2 . . ? 
Cl1 C53 H53A 109.2 . . ? 
Cl2 C53 H53B 109.2 . . ? 
Cl1 C53 H53B 109.2 . . ? 
H53A C53 H53B 107.9 . . ? 
Cl4 C54 Cl3 108.7(8) . . ? 
Cl4 C54 H54A 109.9 . . ? 
Cl3 C54 H54A 109.9 . . ? 
Cl4 C54 H54B 109.9 . . ? 
Cl3 C54 H54B 109.9 . . ? 
H54A C54 H54B 108.3 . . ? 
Cl6 C55 Cl5 113(3) . . ? 
Cl6 C55 H55A 109.1 . . ? 
Cl5 C55 H55A 109.1 . . ? 
Cl6 C55 H55B 109.1 . . ? 
Cl5 C55 H55B 109.1 . . ? 
H55A C55 H55B 107.8 . . ? 
Cl5' C55' Cl6' 115(3) . . ? 
Cl5' C55' H55C 108.6 . . ? 
Cl6' C55' H55C 108.6 . . ? 
Cl5' C55' H55D 108.6 . . ? 
Cl6' C55' H55D 108.6 . . ? 
H55C C55' H55D 107.6 . . ? 
  
loop_ 
 _geom_torsion_atom_site_label_1 
 _geom_torsion_atom_site_label_2 
 _geom_torsion_atom_site_label_3 
 _geom_torsion_atom_site_label_4 
 _geom_torsion 
 _geom_torsion_site_symmetry_1 
 _geom_torsion_site_symmetry_2 
 _geom_torsion_site_symmetry_3 
 _geom_torsion_site_symmetry_4 
 _geom_torsion_publ_flag 
C27 Ni1 O1 C5 62(3) . . . . ? 
C1 Ni1 O1 C5 -54.4(13) . . . . ? 
O2 Ni1 O1 C5 140.8(6) . . . . ? 
C27 Ni1 O2 C31 -52.8(15) . . . . ? 
C1 Ni1 O2 C31 63.7(12) . . . . ? 
O1 Ni1 O2 C31 142.8(12) . . . . ? 
C3 N2 C1 N1 -0.3(6) . . . . ? 
C18 N2 C1 N1 177.9(5) . . . . ? 
C3 N2 C1 Ni1 160.0(13) . . . . ? 
C18 N2 C1 Ni1 -21.8(15) . . . . ? 
C2 N1 C1 N2 -0.3(6) . . . . ? 
C4 N1 C1 N2 174.4(5) . . . . ? 
C2 N1 C1 Ni1 -162.5(8) . . . . ? 
C4 N1 C1 Ni1 12.2(9) . . . . ? 
C27 Ni1 C1 N2 63(2) . . . . ? 
O2 Ni1 C1 N2 -52.4(13) . . . . ? 
O1 Ni1 C1 N2 -131.5(18) . . . . ? 
C27 Ni1 C1 N1 -140.3(14) . . . . ? 
O2 Ni1 C1 N1 104.5(9) . . . . ? 
O1 Ni1 C1 N1 25.4(11) . . . . ? 
C1 N1 C2 C3 0.9(7) . . . . ? 
C4 N1 C2 C3 -173.6(6) . . . . ? 
N1 C2 C3 N2 -1.0(7) . . . . ? 
C1 N2 C3 C2 0.9(7) . . . . ? 
C18 N2 C3 C2 -177.3(6) . . . . ? 
C1 N1 C4 C9 146.2(17) . . . . ? 
C2 N1 C4 C9 -40(2) . . . . ? 
C1 N1 C4 C5 -34.8(18) . . . . ? 
C2 N1 C4 C5 139(2) . . . . ? 
Ni1 O1 C5 C4 47.0(8) . . . . ? 
Ni1 O1 C5 C6 -135.7(7) . . . . ? 
C9 C4 C5 O1 -178.3(5) . . . . ? 
N1 C4 C5 O1 2.7(8) . . . . ? 
C9 C4 C5 C6 4.3(8) . . . . ? 
N1 C4 C5 C6 -174.7(5) . . . . ? 
O1 C5 C6 C7 179.7(5) . . . . ? 
C4 C5 C6 C7 -2.9(8) . . . . ? 
O1 C5 C6 C10 -0.7(8) . . . . ? 
C4 C5 C6 C10 176.7(5) . . . . ? 
C5 C6 C7 C8 0.1(9) . . . . ? 
C10 C6 C7 C8 -179.5(6) . . . . ? 
C6 C7 C8 C9 1.8(9) . . . . ? 
C6 C7 C8 C14 -177.5(6) . . . . ? 
C7 C8 C9 C4 -0.6(8) . . . . ? 
C14 C8 C9 C4 178.7(5) . . . . ? 
C5 C4 C9 C8 -2.5(9) . . . . ? 
N1 C4 C9 C8 176.4(5) . . . . ? 
C7 C6 C10 C12 -2.0(8) . . . . ? 
C5 C6 C10 C12 178.3(5) . . . . ? 
C7 C6 C10 C11 -122(2) . . . . ? 
C5 C6 C10 C11 59(2) . . . . ? 
C7 C6 C10 C13 117.7(18) . . . . ? 
C5 C6 C10 C13 -61.9(18) . . . . ? 
C9 C8 C14 C17 117.4(15) . . . . ? 
C7 C8 C14 C17 -63.4(15) . . . . ? 
C9 C8 C14 C16 -117.7(15) . . . . ? 
C7 C8 C14 C16 61.6(15) . . . . ? 
C9 C8 C14 C15 -1.5(10) . . . . ? 
C7 C8 C14 C15 177.8(8) . . . . ? 
C1 N2 C18 C19 -116.8(17) . . . . ? 
C3 N2 C18 C19 61.2(17) . . . . ? 
C1 N2 C18 C23 62.5(18) . . . . ? 
C3 N2 C18 C23 -119.6(17) . . . . ? 
C23 C18 C19 C20 -8.9(10) . . . . ? 
N2 C18 C19 C20 170.3(6) . . . . ? 
C23 C18 C19 C24 171.1(6) . . . . ? 
N2 C18 C19 C24 -9.7(9) . . . . ? 
C18 C19 C20 C21 2.7(11) . . . . ? 
C24 C19 C20 C21 -177.3(7) . . . . ? 
C19 C20 C21 C22 4.1(12) . . . . ? 
C19 C20 C21 C25 -175.3(8) . . . . ? 
C20 C21 C22 C23 -5.0(12) . . . . ? 
C25 C21 C22 C23 174.4(8) . . . . ? 
C21 C22 C23 C18 -0.8(11) . . . . ? 
C21 C22 C23 C26 175.7(7) . . . . ? 
C19 C18 C23 C22 8.1(10) . . . . ? 
N2 C18 C23 C22 -171.1(6) . . . . ? 
C19 C18 C23 C26 -168.4(6) . . . . ? 
N2 C18 C23 C26 12.4(9) . . . . ? 
C28 N3 C27 N4 -0.1(7) . . . . ? 
C30 N3 C27 N4 173.2(6) . . . . ? 
C28 N3 C27 Ni1 -165.8(6) . . . . ? 
C30 N3 C27 Ni1 7.4(9) . . . . ? 
C29 N4 C27 N3 -0.1(7) . . . . ? 
C44 N4 C27 N3 -173.9(6) . . . . ? 
C29 N4 C27 Ni1 164.5(6) . . . . ? 
C44 N4 C27 Ni1 -9.3(9) . . . . ? 
C1 Ni1 C27 N3 -138.7(12) . . . . ? 
O2 Ni1 C27 N3 27.3(8) . . . . ? 
O1 Ni1 C27 N3 106(2) . . . . ? 
C1 Ni1 C27 N4 59.4(11) . . . . ? 
O2 Ni1 C27 N4 -134.6(7) . . . . ? 
O1 Ni1 C27 N4 -56(2) . . . . ? 
C27 N3 C28 C29 0.2(8) . . . . ? 
C30 N3 C28 C29 -172.9(6) . . . . ? 
N3 C28 C29 N4 -0.2(8) . . . . ? 
C27 N4 C29 C28 0.1(8) . . . . ? 
C44 N4 C29 C28 174.1(6) . . . . ? 
C27 N3 C30 C35 151.5(8) . . . . ? 
C28 N3 C30 C35 -36.3(12) . . . . ? 
C27 N3 C30 C31 -31.5(10) . . . . ? 
C28 N3 C30 C31 140.7(9) . . . . ? 
Ni1 O2 C31 C30 43.7(8) . . . . ? 
Ni1 O2 C31 C32 -136.2(6) . . . . ? 
C35 C30 C31 O2 -179.1(6) . . . . ? 
N3 C30 C31 O2 4.0(10) . . . . ? 
C35 C30 C31 C32 0.9(11) . . . . ? 
N3 C30 C31 C32 -176.1(6) . . . . ? 
O2 C31 C32 C33 -179.5(6) . . . . ? 
C30 C31 C32 C33 0.5(10) . . . . ? 
O2 C31 C32 C36 0.4(10) . . . . ? 
C30 C31 C32 C36 -179.5(6) . . . . ? 
C31 C32 C33 C34 -2.6(11) . . . . ? 
C36 C32 C33 C34 177.5(7) . . . . ? 
C32 C33 C34 C35 3.0(11) . . . . ? 
C32 C33 C34 C40 178.2(7) . . . . ? 
C31 C30 C35 C34 -0.4(11) . . . . ? 
N3 C30 C35 C34 176.5(7) . . . . ? 
C33 C34 C35 C30 -1.4(11) . . . . ? 
C40 C34 C35 C30 -176.6(7) . . . . ? 
C33 C32 C36 C38 0.1(9) . . . . ? 
C31 C32 C36 C38 -179.8(6) . . . . ? 
C33 C32 C36 C39 -121(2) . . . . ? 
C31 C32 C36 C39 59(2) . . . . ? 
C33 C32 C36 C37 119(3) . . . . ? 
C31 C32 C36 C37 -61(3) . . . . ? 
C33 C34 C40 C43 174.6(14) . . . . ? 
C35 C34 C40 C43 -10.4(17) . . . . ? 
C33 C34 C40 C42 44.1(19) . . . . ? 
C35 C34 C40 C42 -141.0(17) . . . . ? 
C33 C34 C40 C41 -65.3(13) . . . . ? 
C35 C34 C40 C41 109.6(11) . . . . ? 
C27 N4 C44 C49 59.7(10) . . . . ? 
C29 N4 C44 C49 -113.3(10) . . . . ? 
C27 N4 C44 C45 -126.5(9) . . . . ? 
C29 N4 C44 C45 60.5(11) . . . . ? 
C49 C44 C45 C46 -6.2(9) . . . . ? 
N4 C44 C45 C46 -179.8(5) . . . . ? 
C49 C44 C45 C50 170.6(6) . . . . ? 
N4 C44 C45 C50 -3.1(8) . . . . ? 
C44 C45 C46 C47 1.6(9) . . . . ? 
C50 C45 C46 C47 -175.2(6) . . . . ? 
C45 C46 C47 C48 1.1(10) . . . . ? 
C45 C46 C47 C51 -178.4(7) . . . . ? 
C46 C47 C48 C49 0.5(10) . . . . ? 
C51 C47 C48 C49 180.0(7) . . . . ? 
C45 C44 C49 C48 7.7(9) . . . . ? 
N4 C44 C49 C48 -178.6(5) . . . . ? 
C45 C44 C49 C52 -169.9(6) . . . . ? 
N4 C44 C49 C52 3.7(9) . . . . ? 
C47 C48 C49 C44 -4.9(10) . . . . ? 
C47 C48 C49 C52 172.9(6) . . . . ? 
  
_diffrn_measured_fraction_theta_max    0.995 
_diffrn_reflns_theta_full              25.00 
_diffrn_measured_fraction_theta_full   0.995 
_refine_diff_density_max    0.793 
_refine_diff_density_min   -0.936 
_refine_diff_density_rms    0.103 


#===END
